# Supplementary material
Source: Royal Society of Chemistry journal article supplement (doi:10.1039/d6ob00759g)

## Supporting Information

# **Synthesis of Enaminones Enabled by Potassium Persulfate Oxidative *N*-Dealkylation and Addition to Ynones**

Yong Xiao, Li-Gang Kou, Bin-Xuan Zou, Qiong, Jia, Yong-Qiang Wang\*

Key Laboratory of Synthetic and Natural Functional Molecule Chemistry of Ministry  
of Education, College of Chemistry & Materials Science, School of Foreign Languages,  
Northwest University; Xi'an 710069, China.

\*Corresponding author. Email: wangyq@nwu.edu.cn

## Table of Contents

|                                                                                        |     |
|----------------------------------------------------------------------------------------|-----|
| 1. General Information.....                                                            | S1  |
| 2. Experimental Section .....                                                          | S2  |
| 2.1 Condition optimization for synthesis of enaminones.....                            | S2  |
| 2.2 Procedure for the Synthesis of Starting Materials .....                            | S7  |
| 2.3 Procedure for the Synthesis of enaminones .....                                    | S8  |
| 2.4 Gram-scale experiment .....                                                        | S8  |
| 2.5 Product diversification .....                                                      | S9  |
| 2.5.1 Preparation of ( <i>Z</i> )-3-hydroxy-1-phenylhept-2-en-1-one ( <b>4a</b> )..... | S9  |
| 2.5.2 Preparation of 5-butyl-3-phenylisoxazole ( <b>4b</b> ).....                      | S9  |
| 2.5.3 Preparation of 5-butyl-1,3-diphenyl-1 <i>H</i> -pyrazole ( <b>4c</b> ).....      | S9  |
| 3. Mechanistic Studies .....                                                           | S10 |
| 3.1 Radical Experiment.....                                                            | S10 |
| 3.2 Control experiment .....                                                           | S10 |
| 3.3 CG-MS and <sup>1</sup> H NMR study of the reaction system.....                     | S11 |
| 4. Characterization datas for compounds.....                                           | S14 |
| 5. References.....                                                                     | S31 |
| 6. NMR spectra .....                                                                   | S32 |

## 1. General Information

Unless noted otherwise, commercially available chemicals were used without further purification. Flash chromatography was performed with silica gel (200-300 mesh). Oil bath served as the heat source. NMR spectra were acquired on Bruker 400 MHz ( $^1\text{H}$  at 400 MHz,  $^{13}\text{C}$  at 101 MHz) or Jeol 400 MHz ( $^1\text{H}$  at 400 MHz,  $^{13}\text{C}$  at 101 MHz). Chemical shifts are reported in parts per million (ppm,  $\delta$ ), downfield from tetramethylsilane (TMS,  $\delta = 0.00$  ppm). The residual solvent signals were used as references for  $^1\text{H}$  and  $^{13}\text{C}$  NMR spectra ( $\text{CDCl}_3$ :  $\delta_{\text{H}} = 7.26$  ppm,  $\delta_{\text{C}} = 77.16$  ppm;  $\text{DMSO}-d_6$ :  $\delta_{\text{H}} = 2.50$  ppm,  $\delta_{\text{C}} = 39.52$  ppm;  $\text{Acetone}-d_6$ :  $\delta_{\text{H}} = 2.05$  ppm,  $\delta_{\text{C}} = 29.8, 206.3$  ppm). Coupling constants,  $J$  were reported in Hertz unit(Hz). Data for  $^1\text{H}$  NMR spectra were reported as follows: chemical shift (ppm, referenced to protium, s = singlet, d = doublet, t = triplet, q = quartet, dd = doublet of doublets, m = multiplet, coupling constant (Hz), and integration). Infrared (IR) data were acquired on a Bruker Invenio-R FT-IR spectrometer. Absorbance frequencies are reported in reciprocal centimeters ( $\text{cm}^{-1}$ ). Mass spectra were acquired on a BrukerDaltonics S2 MicroTof-Q II mass spectrometer. Reaction mixture monitoring was performed by GC-MS 2010plus.

## 2. Experimental Section

### 2.1 Condition optimization for synthesis of enaminones

**Table S1.** Screening of catalysts<sup>a</sup>

Reaction scheme for Table S1: 1a (phenyl prop-1-yn-1-one) reacts with 2a (triethylamine) in the presence of a catalyst (20 mol%), AgOAc (1.5 equiv.), and DMF at 80 °C for 12h to form 3a (enaminone).

| Entry | Cat.                                                  | Yield <sup>b</sup> |
|-------|-------------------------------------------------------|--------------------|
| 1     | CuO                                                   | 32                 |
| 2     | CuI                                                   | Trace              |
| 3     | CuCl <sub>2</sub>                                     | Trace              |
| 4     | Cu(OAc) <sub>2</sub>                                  | Trace              |
| 5     | CuOAc                                                 | Trace              |
| 6     | Cu(TFA) <sub>2</sub>                                  | 5                  |
| 7     | CuSO <sub>4</sub>                                     | 12                 |
| 8     | Cu(OTf) <sub>2</sub>                                  | 3                  |
| 9     | Cu(NO <sub>3</sub> ) <sub>2</sub> · 3H <sub>2</sub> O | 9                  |
| 10    | [Cu(CH <sub>3</sub> CN) <sub>4</sub> ]PF <sub>6</sub> | Trace              |
| 11    | [Cu(CH <sub>3</sub> CN) <sub>4</sub> ]BF <sub>4</sub> | Trace              |

<sup>a</sup>Reaction conditions: **1a** (0.4 mmol) and **2a** (3 equiv.) in DMF (2 mL) were stirred at 80 °C for 12 h. <sup>b</sup>Isolated yield.

**Table S2.** Screening of oxidants<sup>a</sup>

Reaction scheme for Table S2: **1a** (phenyl prop-1-yn-1-one) reacts with **2a** (triethylamine) in the presence of CuO (20 mol%), an oxidant (1.5 equiv.), and DMF at 80 °C for 12h to form **3a** (enaminone).

| Entry | Oxidant | Yield <sup>b</sup> |
|-------|---------|--------------------|
| 1     | AgOAc   | 32                 |
| 2     | BQ      | 9                  |
| 3     | DDQ     | 5                  |

|    |                                                               |    |
|----|---------------------------------------------------------------|----|
| 4  | Oxone                                                         | 49 |
| 5  | K <sub>2</sub> S <sub>2</sub> O <sub>8</sub>                  | 66 |
| 6  | (NH <sub>4</sub> ) <sub>2</sub> S <sub>2</sub> O <sub>8</sub> | 62 |
| 7  | Na <sub>2</sub> S <sub>2</sub> O <sub>8</sub>                 | 59 |
| 8  | PhI(OAc) <sub>2</sub>                                         | 3  |
| 9  | <i>m</i> -CPBA                                                | 25 |
| 10 | IBX                                                           | 21 |

<sup>a</sup>Reaction conditions: **1a** (0.4 mmol) and **2a** (3 equiv.) in DMF (2 mL) were stirred at 80 °C for 12 h. <sup>b</sup>Isolated yield.

**Table S3.** Screening of solvents<sup>a</sup>

Reaction scheme: **1a** + **2a**  $\xrightarrow[\text{Solvent, 80 °C, 12h}]{\text{CuO (20 mol\%), K}_2\text{S}_2\text{O}_8 \text{ (1.5 equiv.)}}$  **3a**

| Entry | Solvent                            | Yield <sup>b</sup> |
|-------|------------------------------------|--------------------|
| 1     | DMF                                | 66                 |
| 2     | DMSO                               | 26                 |
| 3     | DCE                                | 43                 |
| 4     | THF                                | 8                  |
| 5     | MeCN                               | 56                 |
| 6     | 1,4-Dioxane                        | 9                  |
| 7     | Acetone                            | 40                 |
| 8     | CHCl <sub>3</sub>                  | Trace              |
| 9     | PhMe                               | Trace              |
| 10    | CF <sub>3</sub> CH <sub>2</sub> OH | Trace              |
| 11    | <u>Isopropyl alcohol</u>           | 49                 |
| 12    | <i>t</i> -BuOH                     | 46                 |

<sup>a</sup>Reaction conditions: **1a** (0.4 mmol) and **2a** (3 equiv.) in solvent (2 mL) were stirred at 80 °C for 12 h. <sup>b</sup>Isolated yield.

**Table S4.** Screening of temperature<sup>a</sup>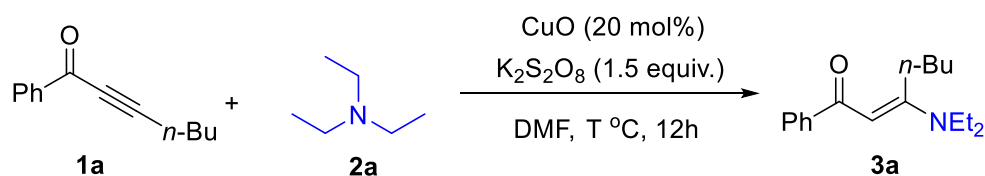

| Entry | Temperature ( °C) | Yield <sup>b</sup> |
|-------|-------------------|--------------------|
| 1     | r.t.              | 5                  |
| 2     | 40                | 21                 |
| 3     | 50                | 33                 |
| 4     | 60                | 46                 |
| 5     | 70                | 56                 |
| 6     | 80                | 66                 |
| 7     | 90                | 64                 |
| 8     | 100               | 60                 |

<sup>a</sup>Reaction conditions: **1a** (0.4 mmol) and **2a** (3 equiv.) in DMF (2 mL) were stirred at T °C for 12 h. <sup>b</sup>Isolated yield.

**Table S5.** Control experiments<sup>a</sup>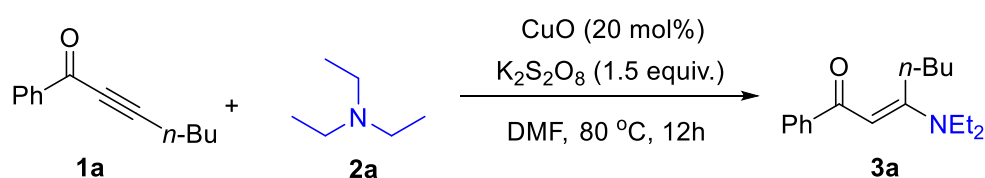

| Entry | Yield <sup>b</sup> |
|-------|--------------------|
| 1     | 66                 |
| 2     | 63                 |
| 3     | 26                 |
| 4     | 31                 |

<sup>a</sup>Reaction conditions: **1a** (0.4 mmol) and **2a** (3 equiv.) in DMF (2 mL) were stirred at 80 °C for 12 h. <sup>b</sup>Isolated yield.

**Table S6.** Screening of oxidants<sup>a</sup>

| Entry | Oxidant                                                       | Yield <sup>b</sup> |
|-------|---------------------------------------------------------------|--------------------|
| 1     | BQ                                                            | 9                  |
| 2     | DDQ                                                           | 6                  |
| 3     | Oxone                                                         | 16                 |
| 4     | K <sub>2</sub> S <sub>2</sub> O <sub>8</sub>                  | 63                 |
| 5     | Na <sub>2</sub> S <sub>2</sub> O <sub>8</sub>                 | 60                 |
| 6     | (NH <sub>4</sub> ) <sub>2</sub> S <sub>2</sub> O <sub>8</sub> | 57                 |
| 7     | DTBP                                                          | 37                 |
| 8     | TBHP                                                          | 60                 |
| 9     | CHP                                                           | 21                 |
| 10    | BPO                                                           | 51                 |
| 12    | H <sub>2</sub> O <sub>2</sub>                                 | 23                 |

<sup>a</sup>Reaction conditions: **1a** (0.4 mmol) and **2a** (3 equiv.) in DMF (2 mL) were stirred at 80 °C for 12 h. <sup>b</sup>Isolated yield.

**Table S7.** Screening of K<sub>2</sub>S<sub>2</sub>O<sub>8</sub> loading<sup>a</sup>

| Entry | K <sub>2</sub> S <sub>2</sub> O <sub>8</sub> loading | Yield <sup>b</sup> |
|-------|------------------------------------------------------|--------------------|
| 1     | 1.0 equiv                                            | 54                 |
| 2     | 1.5 equiv                                            | 63                 |
| 3     | 2.0 equiv                                            | 65                 |
| 4     | 2.5 equiv                                            | 64                 |
| 5     | 3.0 equiv                                            | 60                 |

|   |           |       |
|---|-----------|-------|
| 6 | 5.0 equiv | Trace |
|---|-----------|-------|

<sup>a</sup>Reaction conditions: **1a** (0.4 mmol) and **2a** (3 equiv.) in DMF (2 mL) were stirred at 80 °C for 12 h. <sup>b</sup>Isolated yield.

**Table S8.** Screening of NEt<sub>3</sub> loading<sup>a</sup>

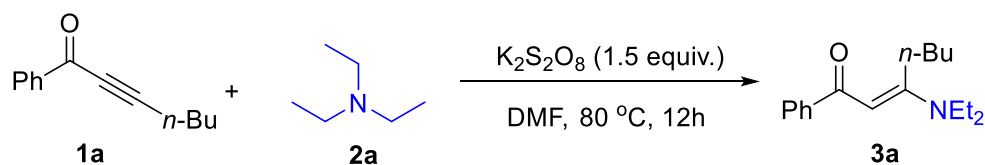

| Entry | NEt <sub>3</sub> loading | Yield <sup>b</sup> |
|-------|--------------------------|--------------------|
| 1     | 1.5 equiv                | N.R.               |
| 2     | 2.0 equiv                | 39                 |
| 3     | 2.5 equiv                | 43                 |
| 4     | 3.0 equiv                | 63                 |
| 5     | 3.5 equiv                | 65                 |
| 6     | 4.0 equiv                | 68                 |
| 7     | 4.5 equiv                | 68                 |

<sup>a</sup>Reaction conditions: **1a** (0.4 mmol) and **2a** (x equiv.) in DMF (2 mL) were stirred at 80 °C for 12 h. <sup>b</sup>Isolated yield.

**Table S9.** Screening of water loading<sup>a</sup>

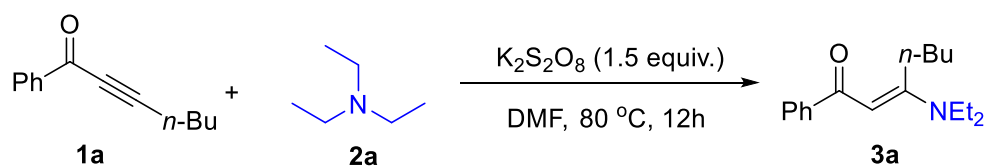

| Entry | H <sub>2</sub> O loading | Yield <sup>b</sup> |
|-------|--------------------------|--------------------|
| 1     | -                        | 68                 |
| 2     | 1.0 equiv                | 66                 |
| 3     | 2.0 equiv                | 67                 |
| 4     | 5.0 equiv                | 66                 |
| 5     | 10.0 equiv               | 65                 |

<sup>a</sup>Reaction conditions: **1a** (0.4 mmol) and **2a** (4 equiv.) in DMF (2 mL) were stirred at

80 °C for 12 h. <sup>b</sup>Isolated yield.

## 2.2 Procedure for the Synthesis of Starting Materials

**1a**<sup>[1]</sup>, **1b**<sup>[3]</sup>, **1c**<sup>[4]</sup>, **1d**<sup>[5]</sup>, **1e**<sup>[1]</sup>, **1f-1g**<sup>[6]</sup>, **1i**<sup>[7]</sup>, **1k**<sup>[4]</sup>, **1l**<sup>[2]</sup>, **1m**<sup>[4]</sup>, **1n**<sup>[8]</sup>, **1o**<sup>[1]</sup>, **1p**<sup>[9]</sup>, **1q**<sup>[10]</sup>, **1r**<sup>[2]</sup>, **1s**<sup>[1]</sup>, **1t**<sup>[11]</sup>, **1u**<sup>[1]</sup>, **1v**<sup>[2]</sup>, **1w**<sup>[12]</sup>, **1y**<sup>[13]</sup>, are known compounds and their characterization data were consistent with these reported in the literature. **1a-1m**, **1n-1s**, **1u-1w** were prepared by general procedure A. **1t**, **1x-1y** were prepared by general procedure B.

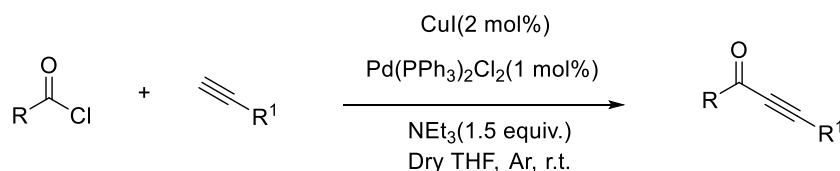

**General procedure A:** An oven-dried 100 mL round bottomed flask equipped with a stirring bar was charged with Pd(PPh<sub>3</sub>)<sub>2</sub>Cl<sub>2</sub> (0.05 mmol, 0.01 equiv.), CuI (0.1 mmol, 0.02 equiv.). After three cycles of evacuation/backfilling sequence with argon, anhydrous THF (40 mL), acetylene (5.0 mmol, 1.0 equiv.), NEt<sub>3</sub> (7.5 mmol, 1.5 equiv.) and acyl chloride (6.0 mmol, 1.2 equiv.) were added to the above mixture. The resulting reaction mixture was stirred at room temperature for 12 h. After completion of the reaction, the solution was concentrated by evaporation to give the residue. EtOAc (80 mL) was added, and the mixture was washed three times with H<sub>2</sub>O (3 × 3 mL) and brine (3 × 3 mL). Then the combined organic layers were dried with Na<sub>2</sub>SO<sub>4</sub> and concentrated to give the residue, which was further purified by silica gel column chromatography to afford the corresponding product.

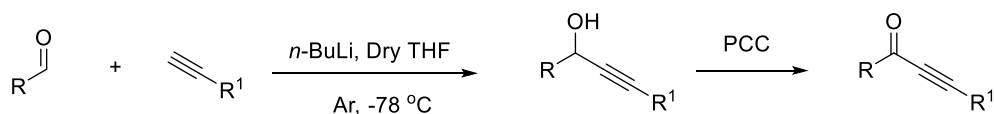

**General procedure B:** An oven-dried 100 mL round bottomed flask equipped with a stirring bar was charged with acetylene (5.0 mmol, 1.0 equiv.) in anhydrous THF (40 mL) at -78 °C, n-BuLi (6.0 mmol, 2.5 M in THF, 1.2 equiv.) was slowly added under Ar. The resulting reaction mixture was stirred at -78 °C for 8 h. Upon completion, the mixture was quenched with saturated NH<sub>4</sub>Cl (10 mL), extracted with EtOAc (3 × 30 mL). The combined extracts were washed with brine, dried over anhydrous Na<sub>2</sub>SO<sub>4</sub>, and concentrated to give the residue, which was further purified by silica gel column chromatography to afford the desired corresponding alcohols.

To a solution of the preceding alcohols in DCM (0.25 M) were added Pyridinium chlorochromate (PCC, 2.0 equiv.), then the mixture was stirred for 8 h. After completion of the reaction, the mixture was cooled to room temperature, EtOAc (80 mL) was added, and the mixture was washed three times with H<sub>2</sub>O (3 × 3 mL) and brine (3 × 3 mL). Then the combined organic layers were dried with Na<sub>2</sub>SO<sub>4</sub> and concentrated to give the residue, which was further purified by silica gel column chromatography to afford the desired product.

### 2.3 Procedure for the Synthesis of enaminones

A 15 mL sealed tube containing a magnetic stir bar was charged with K<sub>2</sub>S<sub>2</sub>O<sub>8</sub> (0.6 mmol, 1.5 equiv.), ynones (0.4 mmol, 1.0 equiv.), DMF (2 mL) and NEt<sub>3</sub> (1.6 mmol, 4.0 equiv.) sequentially. The tube was sealed and the mixture was stirred at 80 °C for 12 h. After cooling to room temperature, the reaction mixture was diluted with EtOAc (40 mL) and washed with H<sub>2</sub>O (3 × 1 mL) and brine (3 × 1 mL). The combined organic layer was dried over anhydrous Na<sub>2</sub>SO<sub>4</sub>, and concentrated to give the residue, which was further purified by silica gel column chromatography to afford the desired product.

### 2.4 Gram-scale experiment

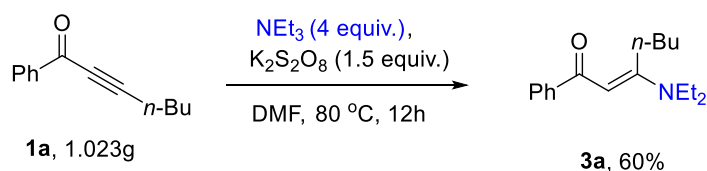

A 50 mL round bottom flask containing a magnetic stir bar was charged with K<sub>2</sub>S<sub>2</sub>O<sub>8</sub> (2.227 g, 8.25 mmol, 1.5 equiv.), ynone (**1a**, 1.023 g, 5.5 mmol, 1.0 equiv.), DMF (11 mL) and NEt<sub>3</sub> (**2a**, 2.222 g, 22 mmol, 4.0 equiv.) sequentially. The reaction mixture was stirred at 80 °C for 12 h. After completion of the reaction, the mixture was cooled to room temperature, EtOAc (80 mL) was added, and the mixture was washed three times with H<sub>2</sub>O (3 × 2 mL) and brine (3 × 2 mL). Then the combined organic layers were dried with anhydrous Na<sub>2</sub>SO<sub>4</sub> and concentrated by rotary evaporation. The crude reaction mixture was further purified by silica gel column chromatography to provide desired product **3a** in 60 % yield.

## 2.5 Product diversification

### 2.5.1 Preparation of (Z)-3-hydroxy-1-phenylhept-2-en-1-one (4a)

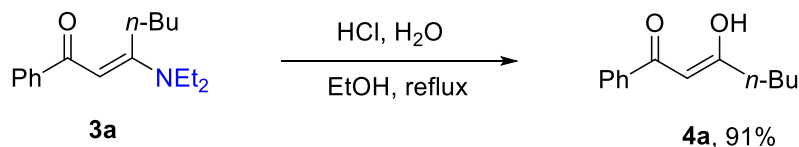

A 10 mL round bottomed flask equipped with a stirring bar was charged with **3a** (0.4 mmol), EtOH (2 mL), 3 drop of concentrated hydrochloric acid and 50 microlitres of water. Then the mixture was refluxed and stirred at 80 °C for 12 h. After completion of the reaction, the mixture was cooled to room temperature, EtOAc (40 mL) was added, and the mixture was washed three times with H<sub>2</sub>O (3 × 1 mL) and brine (3 × 1 mL). Then the combined organic layers were dried with Na<sub>2</sub>SO<sub>4</sub> and concentrated to give the residue, which was further purified by silica gel column chromatography to afford the desired product.

### 2.5.2 Preparation of 5-butyl-3-phenylisoxazole (4b)

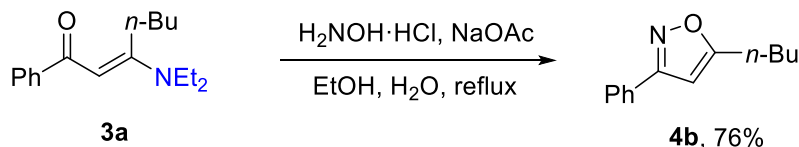

An oven-dried 10 mL round bottomed flask equipped with a stirring bar was charged with **3a** (0.4 mmol), NaOAc (2.5 equiv.), H<sub>2</sub>NOH HCl (1.5 equiv.), EtOH (5 mL), and water (1.5 mL). Then the mixture was refluxed and stirred at 85 °C for 12 h. After completion of the reaction, the mixture was cooled to room temperature, EtOAc (40 mL) was added, and the mixture was washed three times with H<sub>2</sub>O (3 × 1 mL) and brine (3 × 1 mL). Then the combined organic layers were dried with Na<sub>2</sub>SO<sub>4</sub> and concentrated to give the residue, which was further purified by silica gel column chromatography to afford the desired product.

### 2.5.3 Preparation of 5-butyl-1,3-diphenyl-1H-pyrazole (4c)

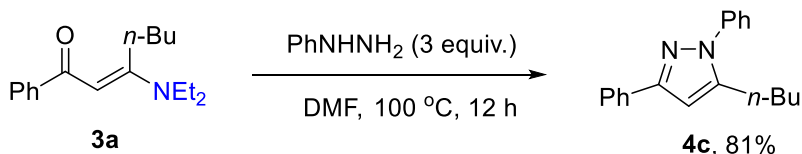

An oven-dried 10 mL round bottomed flask equipped with a stirring bar was charged with **3a** (0.4 mmol), PhNHNH<sub>2</sub> (3.0 equiv.) and DMF (2 ml). Then the

reaction mixture was stirred in a preheated oil bath at 100 °C for 12 h. After completion of the reaction, the mixture was cooled to room temperature, EtOAc (40 mL) was added, and the mixture was washed three times with H<sub>2</sub>O (3 × 1 mL) and brine (3 × 1 mL). Then the combined organic layers were dried with Na<sub>2</sub>SO<sub>4</sub> and concentrated to give the residue, which was further purified by silica gel column chromatography to afford the desired product.

### 3. Mechanistic Studies

#### 3.1 Radical Experiment

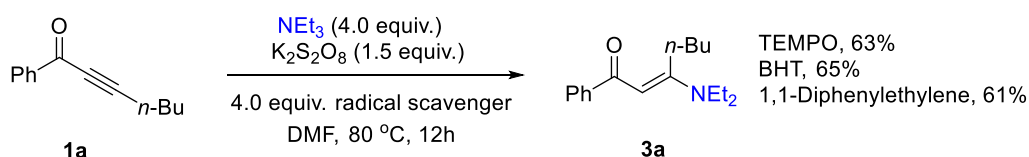

A 15 mL sealed tube containing a magnetic stir bar was charged with K<sub>2</sub>S<sub>2</sub>O<sub>8</sub> (162 mg, 0.6 mmol, 1.5 equiv.), ynone (**1a**, 0.4 mmol, 1.0 equiv.), NEt<sub>3</sub> (161.6 mg, 1.6 mmol, 4.0 equiv.), DMF (2 mL), followed by radical scavenger (TEMPO, 1.6 mmol, 4.0 equiv.; or BHT, 1.6 mmol, 4.0 equiv.; or 1,1-Diphenylethylene, 1.6 mmol, 4.0 equiv.). The resulting reaction mixture was stirred at 80 °C for 12 h. After completion of the reaction, the mixture was cooled to room temperature, EtOAc (40 mL) was added, and the mixture was washed three times with H<sub>2</sub>O (3 × 1 mL) and brine (3 × 1 mL). Then the combined organic layers were dried with Na<sub>2</sub>SO<sub>4</sub> and concentrated to give the residue, which was further purified by silica gel column chromatography to afford the desired product.

#### 3.2 Control experiment

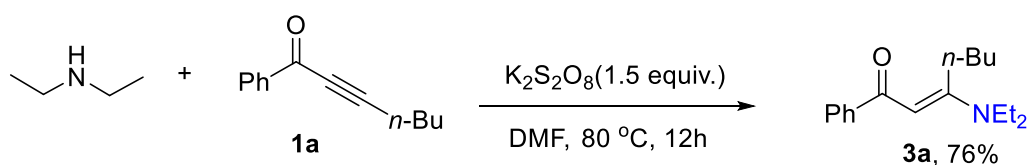

A 15 mL sealed tube containing a magnetic stir bar was charged with K<sub>2</sub>S<sub>2</sub>O<sub>8</sub> (162 mg, 0.6 mmol, 1.5 equiv.), ynone (**1a**, 0.4 mmol, 1.0 equiv.), diethylamine (116.8 mg, 1.6 mmol, 4.0 equiv.), DMF (2 mL). The resulting reaction mixture was stirred at 80 °C for 12 h. After completion of the reaction, the mixture was cooled to room temperature, EtOAc (40 mL) was added, and the mixture was washed three

times with H<sub>2</sub>O (3 × 1 mL) and brine (3 × 1 mL). Then the combined organic layers were dried with Na<sub>2</sub>SO<sub>4</sub> and concentrated to give the residue, which was further purified by silica gel column chromatography to afford the desired product.

### 3.3 GC-MS and <sup>1</sup>H NMR study of the reaction system

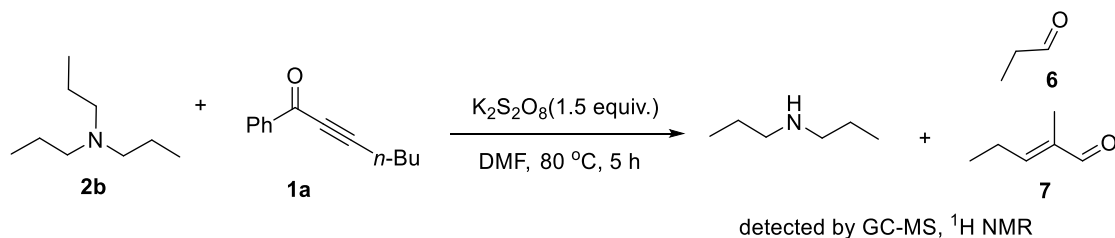

A 15 mL sealed tube containing a magnetic stir bar was charged with K<sub>2</sub>S<sub>2</sub>O<sub>8</sub> (162 mg, 0.6 mmol, 1.5 equiv.), ynone (**1a**, 74.4 mg, 0.4 mmol, 1.0 equiv.), DMF (2 mL) and NPr<sub>3</sub> (**2b**, 228.8 mg, 1.6 mmol, 4.0 equiv.) sequentially. The tube was sealed and the mixture was stirred at 80 °C for 5 h. After cooling to room temperature, the reaction mixture was diluted with EtOAc (40 mL) and washed with H<sub>2</sub>O (3 × 1 mL) and brine (3 × 1 mL). The combined organic layers were concentrated to give the residue. Then the mixture was tested by GC-MS and <sup>1</sup>H NMR.

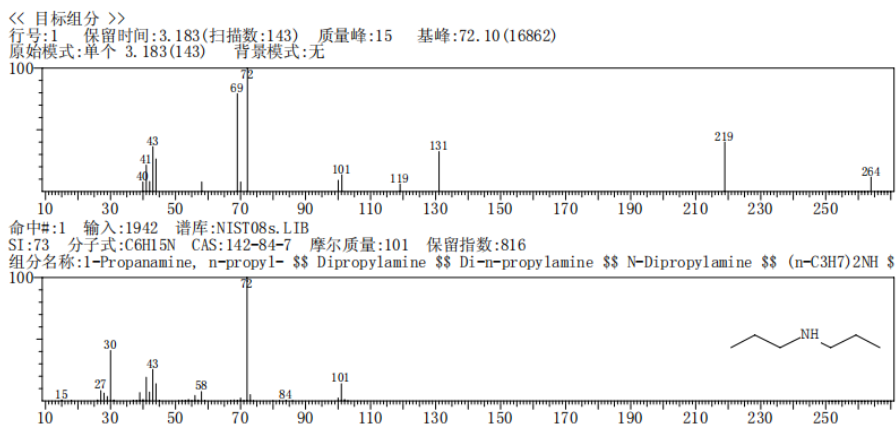

Figure S1. GC-MS spectrum of the reaction mixture of NPr<sub>3</sub>

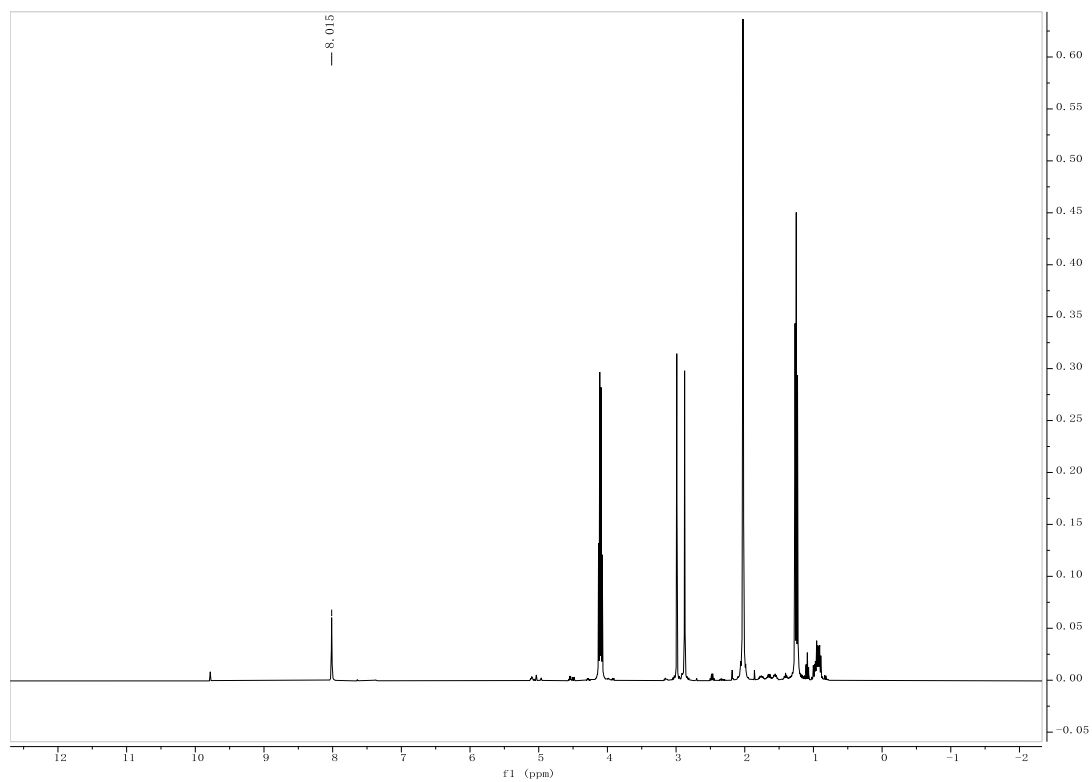

**Figure S2. <sup>1</sup>H NMR spectrum of the reaction mixture of NPr<sub>3</sub>**

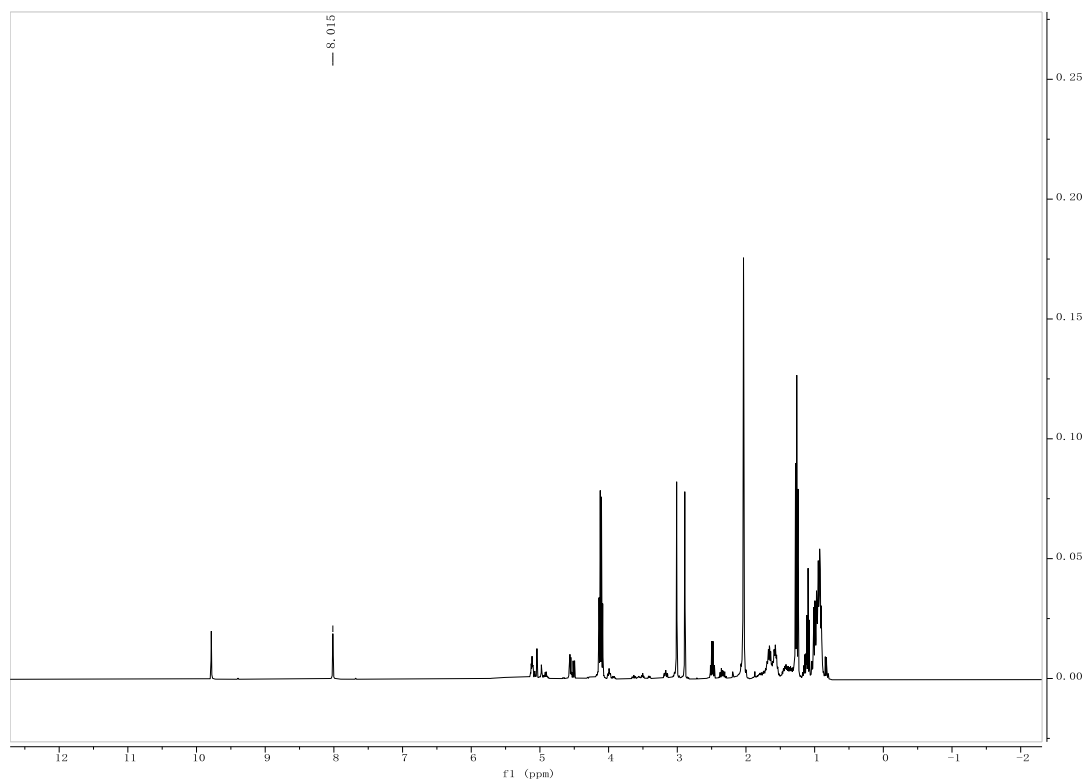

**Figure S3. <sup>1</sup>H NMR spectrum of the NPr<sub>3</sub> reaction mixture after the addition of propionaldehyde.**

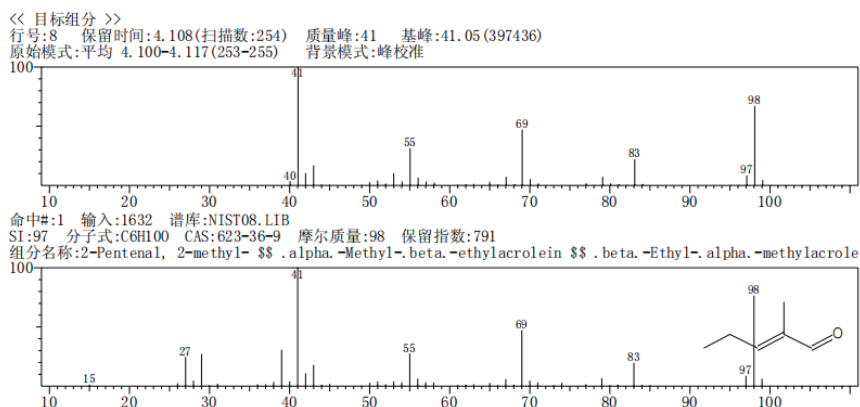

Figure S4. GC-MS spectrum of the reaction mixture of  $\text{NPr}_3$

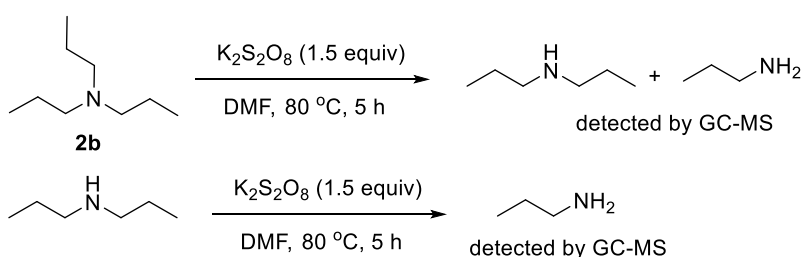

A 15 mL sealed tube containing a magnetic stir bar was charged with  $\text{K}_2\text{S}_2\text{O}_8$  (0.6 mmol, 1.5 equiv.), DMF (2 mL) and  $\text{NPr}_3$  or  $\text{HNPr}_2$  (1.6 mmol, 4.0 equiv.) sequentially. The tube was sealed and the mixture was stirred at 80 °C for 5 h. After cooling to room temperature, the reaction mixture was diluted with EtOAc (40 mL) and washed with  $\text{H}_2\text{O}$  ( $3 \times 1$  mL) and brine ( $3 \times 1$  mL). The combined organic layers were concentrated to give the residue. Then the mixture was tested by GC-MS.

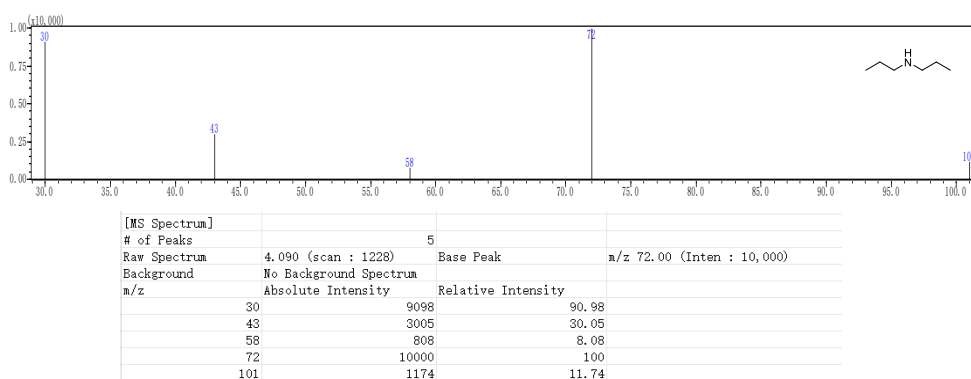

Figure S5. GC-MS spectrum of the oxidative cleavage of  $\text{NPr}_3$

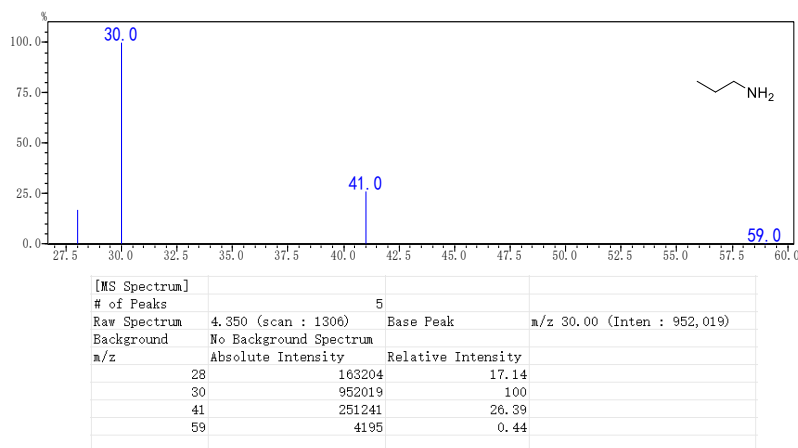

Figure S6. GC-MS spectrum of the oxidative cleavage of NPr<sub>3</sub>

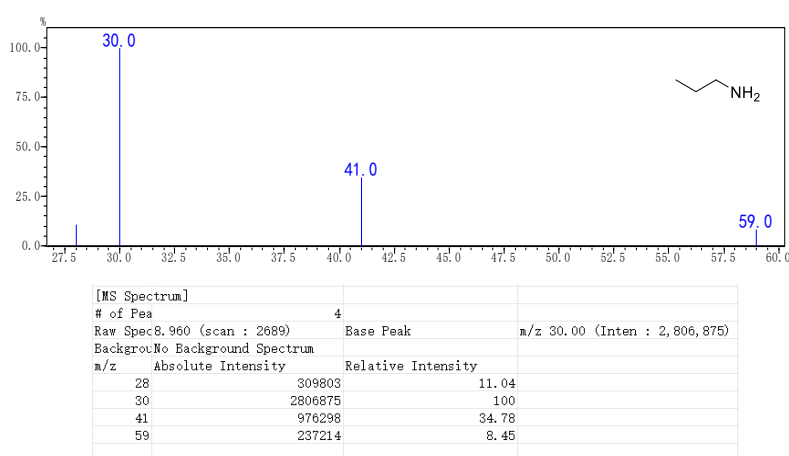

Figure S7. GC-MS spectrum of the oxidative cleavage of HNPr<sub>2</sub>

#### 4. Characterization data for compounds

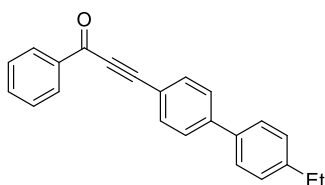

**3-(4'-ethyl-[1,1'-biphenyl]-4-yl)-1-phenylprop-2-yn-1-one (1h).** <sup>1</sup>H NMR (400 MHz, CDCl<sub>3</sub>) δ 8.25 (d, *J* = 6.8 Hz, 2H), 7.76 (d, *J* = 8.3 Hz, 2H), 7.66 – 7.63 (m, 3H), 7.58 – 7.51 (m, 4H), 7.31 (d, *J* = 8.0 Hz, 2H), 2.72 (q, *J* = 7.6 Hz, 2H), 1.29 (t, *J* = 7.6 Hz, 3H). <sup>13</sup>C NMR (101 MHz, CDCl<sub>3</sub>) δ 178.1, 144.7, 143.7, 137.2, 137.1, 134.2, 133.7, 129.7, 128.8, 128.7, 127.3, 127.2, 118.6, 93.6, 87.7, 28.7, 15.6. HRMS (ESI) *m/z*: [M + H]<sup>+</sup> Calcd for C<sub>23</sub>H<sub>19</sub>O 311.1430; Found 311.1438. IR: 3026, 2198, 1788, 1634, 1492, 1288, 1209, 999, 820, 689 cm<sup>-1</sup>.

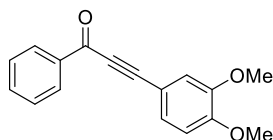

**3-(3,4-dimethoxyphenyl)-1-phenylprop-2-yn-1-one (1j).**  $^1\text{H}$  NMR (400 MHz,  $\text{CDCl}_3$ )  $\delta$  8.21 (d,  $J = 8.1$  Hz, 2H), 7.64 – 7.58 (m, 1H), 7.54 – 7.47 (m, 2H), 7.33 (d,  $J = 8.3$  Hz, 1H), 7.15 (s, 1H), 6.88 (d,  $J = 8.3$  Hz, 1H), 3.92 (s, 3H), 3.91 (s, 3H).  $^{13}\text{C}$  NMR (101 MHz,  $\text{CDCl}_3$ )  $\delta$  178.1, 151.8, 149.0, 137.1, 134.1, 129.6, 128.7, 127.6, 115.5, 112.0, 111.2, 94.4, 86.7, 56.2, 56.1. HRMS (ESI)  $m/z$ :  $[\text{M} + \text{H}]^+$  Calcd for  $\text{C}_{17}\text{H}_{15}\text{O}_3$  267.1016; Found 267.1021. IR: 2934, 2179, 1630, 1509, 1199, 1135, 1014, 696, 617, 544  $\text{cm}^{-1}$ .

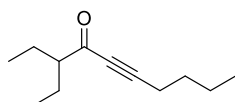

**3-ethyldec-5-yn-4-one (1x).**  $^1\text{H}$  NMR (400 MHz,  $\text{CDCl}_3$ )  $\delta$  2.35 (t,  $J = 7.0$  Hz, 2H), 2.31 – 2.23 (m, 1H), 1.75 – 1.62 (m, 2H), 1.59 – 1.47 (m, 4H), 1.44 – 1.37 (m, 2H), 0.95 – 0.82 (m, 9H).  $^{13}\text{C}$  NMR (101 MHz,  $\text{CDCl}_3$ )  $\delta$  192.6, 94.7, 80.0, 57.8, 29.9, 24.2, 22.0, 18.7, 13.6, 11.7. HRMS (ESI)  $m/z$ :  $[\text{M} + \text{H}]^+$  Calcd for  $\text{C}_{12}\text{H}_{21}\text{O}$  181.1587; Found 181.1591. IR: 2962, 2933, 2210, 1668, 1459, 1262, 1219, 1181, 1000, 806  $\text{cm}^{-1}$ .

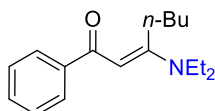

**(E)-3-diethylamino-1-phenylhept-2-en-1-one (3a).** Prepared according to general procedure and purified by flash column chromatography to afford the product as a yellow oil. (70.44 mg, 68% yield). Eluant: ethyl acetate/petroleum ether (1:10,  $R_f = 0.30$ ).  $^1\text{H}$  NMR (400 MHz,  $\text{CDCl}_3$ )  $\delta$  7.84 – 7.82 (m, 2H), 7.39 – 7.34 (m, 3H), 5.68 (s, 1H), 3.36 (q,  $J = 7.1$  Hz, 4H), 3.12 – 3.01 (m, 2H), 1.60 – 1.46 (m, 4H), 1.22 (t,  $J = 7.1$  Hz, 6H), 0.97 (t,  $J = 7.0$  Hz, 3H).  $^{13}\text{C}$  NMR (101 MHz,  $\text{CDCl}_3$ )  $\delta$  187.2, 166.6, 143.6, 130.0, 128.0, 127.3, 90.9, 44.0, 31.0, 28.9, 23.3, 14.0, 13.0. HRMS (ESI)  $m/z$ :  $[\text{M} + \text{H}]^+$  Calcd for  $\text{C}_{17}\text{H}_{26}\text{NO}$  260.2009; Found 260.1999. IR: 3324, 2972, 2877, 1597, 1571, 1086, 1045, 879, 733, 652  $\text{cm}^{-1}$ .

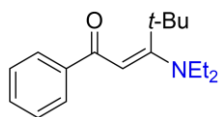

**(E)-3-diethylamino-4,4-dimethyl-1-phenylpent-2-en-1-one (3b).** Prepared according to general procedure and purified by flash column chromatography to afford the product as a yellow oil. (22.79 mg, 22% yield). Eluant: ethyl acetate/petroleum ether (1:10,  $R_f = 0.30$ ).  $^1\text{H}$  NMR (400 MHz,  $\text{CDCl}_3$ )  $\delta$  7.89 – 7.86 (m, 2H), 7.41 – 7.38 (m, 3H), 6.08 (s, 1H), 3.39 (q,  $J = 7.0$  Hz, 4H), 1.33 (s, 9H), 1.13 (t,  $J = 7.1$  Hz, 6H).  $^{13}\text{C}$  NMR (101 MHz,  $\text{CDCl}_3$ )  $\delta$  185.4, 174.0, 142.0, 130.6, 128.2, 127.9, 97.4, 47.0, 38.6, 30.9, 13.9. HRMS (ESI)  $m/z$ :  $[\text{M} + \text{H}]^+$  Calcd for  $\text{C}_{17}\text{H}_{26}\text{NO}$  260.2009; Found 260.1996. IR: 2967, 2870, 1653, 1599, 1576, 1518, 848, 768, 696, 649  $\text{cm}^{-1}$ .

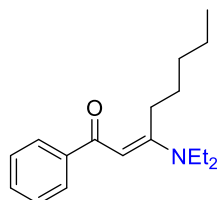

**(E)-3-diethylamino-1-phenyloct-2-en-1-one (3c).** Prepared according to general procedure and purified by flash column chromatography to afford the product as a yellow oil. (70.98 mg, 65% yield). Eluant: ethyl acetate/petroleum ether (1:10,  $R_f = 0.30$ ).  $^1\text{H}$  NMR (400 MHz,  $\text{CDCl}_3$ )  $\delta$  7.85 – 7.79 (m, 2H), 7.37 – 7.26 (m, 3H), 5.66 (s, 1H), 3.34 (q,  $J = 7.1$  Hz, 4H), 3.11 – 3.01 (m, 2H), 1.62 – 1.52 (m, 2H), 1.50 – 1.41 (m, 2H), 1.39 – 1.31 (m, 2H), 1.20 (t,  $J = 7.1$  Hz, 6H), 0.90 (t,  $J = 7.2$  Hz, 3H).  $^{13}\text{C}$  NMR (101 MHz,  $\text{CDCl}_3$ )  $\delta$  187.1, 166.6, 143.5, 130.0, 128.0, 127.2, 90.8, 44.1, 32.3, 29.0, 28.8, 22.6, 14.1, 13.2. HRMS (ESI)  $m/z$ :  $[\text{M} + \text{Na}]^+$  Calcd for  $\text{C}_{18}\text{H}_{27}\text{NNaO}$  296.1985; Found 296.1987. IR: 2956, 2929, 1621, 1525, 1472, 1355, 1215, 1093, 770, 705  $\text{cm}^{-1}$ .

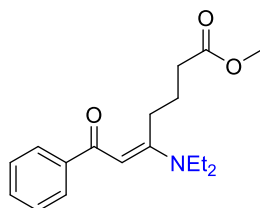

**methyl (*E*)-5-diethylamino-7-oxo-7-phenylhept-5-enoate (3d).** Prepared according to general procedure and purified by flash column chromatography to afford the product as a yellow oil. (88.47 mg, 73% yield). Eluant: ethyl acetate/petroleum ether (1:10,  $R_f = 0.25$ ).  $^1\text{H NMR}$  (400 MHz,  $\text{CDCl}_3$ )  $\delta$  7.80 (d,  $J = 7.0$  Hz, 2H), 7.38 – 7.33 (m, 3H), 5.69 (s, 1H), 3.65 (s, 3H), 3.40 (q,  $J = 7.2$  Hz, 4H), 3.16 – 3.04 (m, 2H), 2.55 (t,  $J = 7.0$  Hz, 2H), 1.92 – 1.85 (m, 2H), 1.22 (t,  $J = 7.1$  Hz, 6H).  $^{13}\text{C NMR}$  (101 MHz,  $\text{CDCl}_3$ )  $\delta$  187.3, 174.3, 165.4, 143.4, 130.1, 128.0, 127.2, 91.0, 51.5, 44.2, 33.6, 28.3, 23.9, 13.7. HRMS (ESI)  $m/z$ :  $[\text{M} + \text{H}]^+$  Calcd for  $\text{C}_{18}\text{H}_{26}\text{NO}_3$  304.1907; Found 304.1896. IR: 3344, 2941, 2360, 1733, 1524, 1473, 1223, 1022, 772, 652  $\text{cm}^{-1}$ .

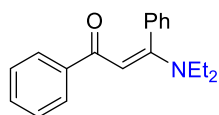

**(*E*)-3-diethylamino-1,3-diphenylprop-2-en-1-one (3e).**<sup>[14]</sup> Prepared according to general procedure and purified by flash column chromatography to afford the product as a yellow solid. (81.46 mg, 73% yield). m. p. = 53 – 55 °C. Eluant: ethyl acetate/petroleum ether (1:10,  $R_f = 0.3$ ).  $^1\text{H NMR}$  (400 MHz,  $\text{CDCl}_3$ )  $\delta$  7.75 (d,  $J = 6.7$  Hz, 2H), 7.37 – 7.23 (m, 6H), 7.17 (dd,  $J = 6.0, 2.6$  Hz, 2H), 5.87 (s, 1H), 3.34 – 3.03 (m, 4H), 1.25 – 0.96 (m, 6H).  $^{13}\text{C NMR}$  (101 MHz,  $\text{CDCl}_3$ )  $\delta$  187.2, 163.3, 142.2, 137.3, 130.5, 128.5, 128.3, 128.0, 127.9, 127.6, 93.2, 44.3, 12.8. HRMS (ESI)  $m/z$ :  $[\text{M} + \text{H}]^+$  Calcd for  $\text{C}_{19}\text{H}_{22}\text{NO}$  280.1696; Found 280.1689. IR: 2974, 2361, 1631, 1517, 1474, 1357, 1212, 895, 768, 698  $\text{cm}^{-1}$ .

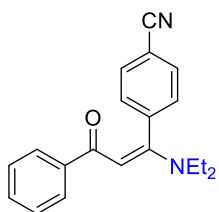

**(*E*)-4-(1-diethylamino-3-oxo-3-phenylprop-1-en-1-yl)benzonitrile (3f).** Prepared according to general procedure and purified by flash column chromatography to afford the product as a yellow solid. (79.04 mg, 65% yield). m. p. = 103 – 105 °C. Eluant: ethyl acetate/petroleum ether (1:8,  $R_f = 0.25$ ).  $^1\text{H NMR}$  (400 MHz,  $\text{CDCl}_3$ )  $\delta$  7.83 – 7.78 (m, 2H), 7.74 – 7.69 (m, 2H), 7.44 – 7.33 (m, 5H), 5.98 (s, 1H), 3.39 – 3.10 (m, 4H), 1.29 – 1.08 (m, 6H).  $^{13}\text{C NMR}$  (101 MHz,  $\text{CDCl}_3$ )  $\delta$  187.2, 161.0, 142.5,

141.4, 132.4, 131.0, 128.8, 128.1, 127.5, 118.8, 112.1, 93.3, 44.5, 13.3. HRMS (ESI)  $m/z$ :  $[M + H]^+$  Calcd for  $C_{20}H_{21}N_2O$  305.1648; Found 305.1644. IR: 3326, 2973, 2883, 2360, 1653, 1380, 1087, 1046, 880, 649  $cm^{-1}$ .

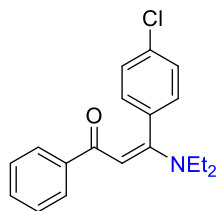

**(E)-3-(4-chlorophenyl)-3-(diethylamino)-1-phenylprop-2-en-1-one (3g).** Prepared according to general procedure and purified by flash column chromatography to afford the product as a yellow solid. (95.15 mg, 76% yield). m. p. = 99 - 102 °C. Eluant: ethyl acetate/petroleum ether (1:8,  $R_f$  = 0.25).  $^1H$  NMR (400 MHz,  $CDCl_3$ )  $\delta$  7.85 - 7.80 (m, 2H), 7.43 - 7.33 (m, 5H), 7.24 - 7.15 (m, 2H), 5.96 (s, 1H), 3.43 - 3.11 (m, 4H), 1.31 - 1.06 (m, 6H).  $^{13}C$  NMR (101 MHz,  $CDCl_3$ )  $\delta$  187.2, 162.0, 141.8, 135.7, 134.2, 130.7, 129.3, 128.9, 128.0, 127.6, 93.3, 44.4, 13.2. HRMS (ESI)  $m/z$ :  $[M + H]^+$  Calcd for  $C_{19}H_{21}ClNO$  314.1306; Found 314.1296. IR: 3324, 2973, 2881, 2361, 1653, 1379, 1087, 1045, 879, 642  $cm^{-1}$ .

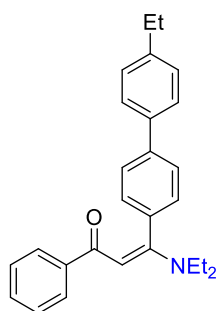

**(E)-3-diethylamino-3-(4'-ethyl-[1,1'-biphenyl]-4-yl)-1-phenylprop-2-en-1-one (3h).** Prepared according to general procedure and purified by flash column chromatography to afford the product as a yellow solid. (88.85 mg, 58% yield). m. p. = 121 - 123 °C. Eluant: ethyl acetate/petroleum ether (1:10,  $R_f$  = 0.30).  $^1H$  NMR (400 MHz,  $CDCl_3$ )  $\delta$  7.88 - 7.83 (m, 2H), 7.67 - 7.61 (m, 2H), 7.55 - 7.60 (m, 2H), 7.41 - 7.23 (m, 7H), 5.98 (s, 1H), 3.48 - 3.12 (m, 4H), 2.69 (q,  $J$  = 7.6 Hz, 2H), 1.28 (t,  $J$  = 7.6 Hz, 6H), 1.30 - 1.12 (m, 3H).  $^{13}C$  NMR (101 MHz,  $CDCl_3$ )  $\delta$  187.4, 163.3, 143.4, 142.2, 140.9, 138.2, 135.9, 130.5, 128.4, 128.3, 128.0, 127.7, 127.1, 127.0,

93.5, 44.4, 28.6, 15.6, 13.1. HRMS (ESI)  $m/z$ :  $[M + H]^+$  Calcd for  $C_{27}H_{30}NO$  384.2322; Found 384.2315. IR: 3323, 2973, 2882, 2361, 1653, 1379, 1087, 1045, 879, 649  $cm^{-1}$ .

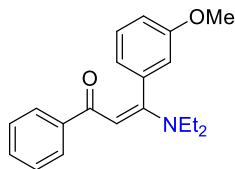

**(E)-3-diethylamino-3-(3-methoxyphenyl)-1-phenylprop-2-en-1-one (3i).** Prepared according to general procedure and purified by flash column chromatography to afford the product as a yellow oil. (86.52 mg, 70% yield). Eluant: ethyl acetate/petroleum ether (1:10,  $R_f = 0.30$ ).  $^1H$  NMR (400 MHz,  $CDCl_3$ )  $\delta$  7.84 (d,  $J = 7.4$  Hz, 2H), 7.41 – 7.31 (m, 4H), 6.97 – 6.74 (m, 3H), 5.93 (s, 1H), 3.80 (s, 3H), 3.47 – 3.06 (m, 4H), 1.37 – 1.03 (m, 6H).  $^{13}C$  NMR (101 MHz,  $CDCl_3$ )  $\delta$  187.2, 163.0, 159.7, 142.1, 138.6, 130.5, 129.6, 128.0, 127.6, 120.4, 113.7, 113.5, 93.1, 55.2, 44.3, 14.7. HRMS (ESI)  $m/z$ :  $[M + Na]^+$  Calcd for  $C_{20}H_{23}NNaO_2$  332.1621; Found 332.1608. IR: 3325, 2973, 2882, 2361, 1653, 1379, 1087, 1045, 879, 657  $cm^{-1}$ .

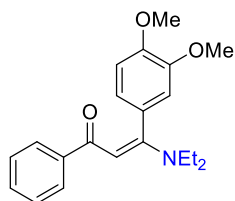

**(E)-3-diethylamino-3-(3,4-dimethoxyphenyl)-1-phenylprop-2-en-1-one (3j).** Prepared according to general procedure and purified by flash column chromatography to afford the product as a yellow oil. (84.07 mg, 62% yield). Eluant: ethyl acetate/petroleum ether (1:10,  $R_f = 0.30$ ).  $^1H$  NMR (400 MHz, Acetone- $d_6$ )  $\delta$  7.81 (d,  $J = 7.8$  Hz, 2H), 7.40 – 7.33 (m, , 3H), 6.93 (d,  $J = 8.1$  Hz, 1H), 6.79 (d,  $J = 1.9$  Hz, 1H), 6.73 (dd,  $J = 8.2, 1.9$  Hz, 1H), 5.99 (s, 1H), 3.83 (s, 3H), 3.78 (s, 3H), 3.43 – 3.21 (m, 4H), 1.26 – 1.14(m, 6H).  $^{13}C$  NMR (101 MHz, Acetone- $d_6$ )  $\delta$  186.1, 163.3, 150.2, 150.1, 143.5, 130.9, 130.8, 128.7, 128.1, 121.7, 113.3, 112.2, 93.7, 56.1, 55.9, 44.6, 13.1. HRMS (ESI)  $m/z$ :  $[M + Na]^+$  Calcd for  $C_{21}H_{25}NNaO_3$  362.1727; Found 362.1735. IR: 3338, 2939, 2831, 2360, 1607, 1509, 1437, 1256, 1024, 701  $cm^{-1}$ .

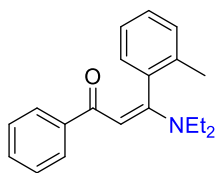

**(E)-3-diethylamino-1-phenyl-3-(*o*-tolyl)prop-2-en-1-one (3k).** Prepared according to general procedure and purified by flash column chromatography to afford the product as a yellow oil. (23.44 mg, 20% yield). Eluant: ethyl acetate/petroleum ether (1:10,  $R_f = 0.30$ ).  $^1\text{H}$  NMR (400 MHz,  $\text{CDCl}_3$ )  $\delta$  7.84 (d,  $J = 8.0$  Hz, 2H), 7.39 – 7.21 (m, 6H), 7.08 (d,  $J = 7.2$  Hz, 1H), 6.00 (s, 1H), 3.66 – 3.36 (m, 2H), 3.04 – 2.91 (m, 2H), 2.21 (s, 3H), 1.42 – 1.30 (m, 3H), 1.02 – 0.88 (m, 3H).  $^{13}\text{C}$  NMR (101 MHz,  $\text{CDCl}_3$ )  $\delta$  186.2, 161.9, 142.1, 136.7, 135.0, 130.3, 129.9, 128.1, 127.9, 127.5, 127.2, 125.9, 91.8, 44.4, 43.4, 19.0, 14.3, 11.2. HRMS (ESI)  $m/z$ :  $[\text{M} + \text{H}]^+$  Calcd for  $\text{C}_{20}\text{H}_{24}\text{NO}$  294.1852; Found 294.1841. IR: 2974, 2361, 2341, 1629, 1517, 1357, 1213, 900, 761, 657  $\text{cm}^{-1}$ .

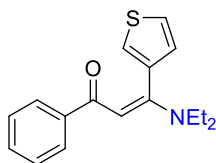

**(E)-3-diethylamino-1-phenyl-3-(thiophen-3-yl)prop-2-en-1-one (3l).** Prepared according to general procedure and purified by flash column chromatography to afford the product as a yellow oil. (76.36 mg, 74% yield). Eluant: ethyl acetate/petroleum ether (1:10,  $R_f = 0.30$ ).  $^1\text{H}$  NMR (400 MHz,  $\text{DMSO}-d_6$ )  $\delta$  7.74 (d,  $J = 6.5$  Hz, 2H), 7.54 (dd,  $J = 4.9, 2.9$  Hz, 1H), 7.45 – 7.36 (m, 3H), 7.34 (d,  $J = 2.8$  Hz, 1H), 6.94 (d,  $J = 4.9$  Hz, 1H), 5.93 (s, 1H), 3.32 – 3.17 (m, 4H), 1.12 (t,  $J = 7.0$  Hz, 6H).  $^{13}\text{C}$  NMR (101 MHz,  $\text{DMSO}-d_6$ )  $\delta$  184.8, 157.5, 142.0, 136.5, 130.3, 128.1, 128.0, 127.0, 125.6, 123.6, 92.7, 43.8, 12.8. HRMS (ESI)  $m/z$ :  $[\text{M} + \text{H}]^+$  Calcd for  $\text{C}_{17}\text{H}_{20}\text{NOS}$  286.1260; Found 286.1261. IR: 3391, 2973, 2360, 1625, 1505, 1435, 1355, 1211, 893, 766, 701, 649  $\text{cm}^{-1}$ .

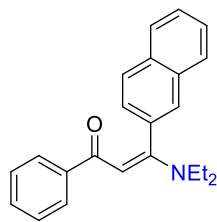

**(E)-3-diethylamino-3-(naphthalen-2-yl)-1-phenylprop-2-en-1-one (3m).** Prepared according to general procedure and purified by flash column chromatography to afford the product as a yellow solid. (81.59 mg, 62% yield). m. p. = 112 - 115 °C. Eluant: ethyl acetate/petroleum ether (1:10,  $R_f = 0.30$ ).  $^1\text{H}$  NMR (400 MHz,  $\text{DMSO-}d_6$ )  $\delta$  7.99 – 7.92 (m, 3H), 7.79 – 7.71 (m, 3H), 7.57 – 7.51 (m, 2H), 7.44 – 7.36 (m, 3H), 7.32 (d,  $J = 8.4$  Hz, 1H), 6.04 (s, 1H), 3.45 – 2.91 (m, 4H), 1.39 – 0.84 (m, 6H).  $^{13}\text{C}$  NMR (101 MHz,  $\text{DMSO-}d_6$ )  $\delta$  184.6, 162.3, 141.8, 134.9, 132.9, 132.6, 130.4, 128.1, 128.0, 127.6, 127.5, 127.0, 126.4, 126.2, 126.2, 126.1, 92.1, 43.9, 13.8. HRMS (ESI)  $m/z$ :  $[\text{M} + \text{H}]^+$  Calcd for  $\text{C}_{23}\text{H}_{24}\text{NO}$  330.1852; Found 330.1841. IR: 3367, 2974, 2360, 1627, 1514, 1471, 1356, 1213, 1052, 908, 700, 653  $\text{cm}^{-1}$ .

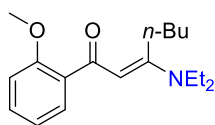

**(E)-3-diethylamino-1-(2-methoxyphenyl)hept-2-en-1-one (3n).** Prepared according to general procedure and purified by flash column chromatography to afford the product as a yellow oil. (73.98 mg, 64% yield). Eluant: ethyl acetate/petroleum ether (1:10,  $R_f = 0.30$ ).  $^1\text{H}$  NMR (400 MHz,  $\text{DMSO-}d_6$ )  $\delta$  7.35 (dd,  $J = 7.5, 1.8$  Hz, 1H), 7.33 – 7.28 (m, 1H), 7.01 (d,  $J = 8.3$  Hz, 1H), 6.94 – 6.90 (m, 1H), 5.46 (s, 1H), 3.77 (s, 3H), 3.29 (q,  $J = 7.0$  Hz, 4H), 3.01 – 2.89 (m, 2H), 1.47 – 1.39 (m, 4H), 1.13 (t,  $J = 7.0$  Hz, 6H), 0.93 (t,  $J = 6.8$  Hz, 3H).  $^{13}\text{C}$  NMR (101 MHz,  $\text{DMSO-}d_6$ )  $\delta$  185.7, 164.0, 156.1, 134.5, 130.0, 129.0, 120.1, 111.8, 95.0, 55.5, 43.6, 30.6, 28.0, 22.5, 13.8, 12.9. HRMS (ESI)  $m/z$ :  $[\text{M} + \text{Na}]^+$  Calcd for  $\text{C}_{18}\text{H}_{27}\text{NNaO}_2$  312.1934; Found 312.1919. IR: 3336, 2935, 2360, 1588, 1519, 1458, 1087, 1024, 754, 646  $\text{cm}^{-1}$ .

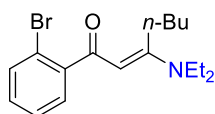

**(E)-1-(2-bromophenyl)-3-(diethylamino)hept-2-en-1-one (3o).** Prepared according to general procedure and purified by flash column chromatography to afford the product as a yellow oil. (93.28 mg, 69% yield). Eluant: ethyl acetate/petroleum ether (1:8,  $R_f = 0.25$ ).  $^1\text{H}$  NMR (400 MHz,  $\text{DMSO-}d_6$ )  $\delta$  7.55 (d,  $J = 8.0$  Hz, 1H), 7.37 – 7.29 (m, 2H), 7.22 (m, 1H), 5.02 (s, 1H), 3.38 – 3.23 (m, 4H), 3.07 – 2.94 (m, 2H), 1.55 – 1.39 (m, 4H), 1.11 (t,  $J = 7.1$  Hz, 6H), 0.93 (t,  $J = 7.0$  Hz, 3H).  $^{13}\text{C}$  NMR (101 MHz,  $\text{DMSO-}d_6$ )  $\delta$  186.8, 165.4, 146.8, 132.5, 129.4, 128.1, 127.4, 118.2, 92.8, 43.6, 30.5, 27.9, 22.5, 14.3, 13.8. HRMS (ESI)  $m/z$ :  $[\text{M} + \text{H}]^+$  Calcd for  $\text{C}_{17}\text{H}_{25}\text{BrNO}$  338.1114; Found 338.1100. IR: 3325, 2937, 2360, 1558, 1523, 1458, 1090, 1024, 741, 669  $\text{cm}^{-1}$ .

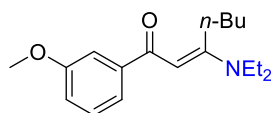

**(E)-3-diethylamino-1-(3-methoxyphenyl)hept-2-en-1-one (3p).** Prepared according to general procedure and purified by flash column chromatography to afford the product as a yellow oil. (78.61 mg, 68% yield). Eluant: ethyl acetate/petroleum ether (1:10,  $R_f = 0.30$ ).  $^1\text{H}$  NMR (400 MHz,  $\text{DMSO-}d_6$ )  $\delta$  7.38 – 7.27 (m, 3H), 6.98 (d,  $J = 8.0$  Hz, 1H), 5.64 (s, 1H), 3.78 (s, 3H), 3.36 (q,  $J = 6.8$  Hz, 4H), 3.04 – 2.95 (m, 2H), 1.38 – 1.49 (m, 4H), 1.14 (t,  $J = 7.0$  Hz, 6H), 0.92 (t,  $J = 6.9$  Hz, 3H).  $^{13}\text{C}$  NMR (101 MHz,  $\text{DMSO-}d_6$ )  $\delta$  184.4, 165.6, 159.2, 144.7, 129.0, 119.1, 115.7, 112.0, 89.6, 55.0, 43.6, 30.6, 28.0, 22.6, 13.8, 11.8. HRMS (ESI)  $m/z$ :  $[\text{M} + \text{Na}]^+$  Calcd for  $\text{C}_{18}\text{H}_{27}\text{NNaO}_2$  312.1934; Found 312.1921. IR: 2958, 2932, 2360, 1576, 1525, 1472, 1251, 1088, 779, 685  $\text{cm}^{-1}$ .

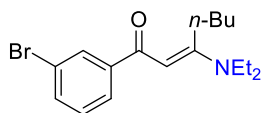

**(E)-1-(3-bromophenyl)-3-(diethylamino)hept-2-en-1-one (3q).** Prepared according to general procedure and purified by flash column chromatography to afford the product as a yellow oil. (94.64 mg, 70% yield). Eluant: ethyl acetate/petroleum ether (1:8,  $R_f = 0.25$ ).  $^1\text{H}$  NMR (400 MHz,  $\text{DMSO-}d_6$ )  $\delta$  7.89 (s, 1H), 7.78 (d,  $J = 8.0$  Hz, 1H), 7.60 (d,  $J = 8.0$  Hz, 1H), 7.37 – 7.33 (m, 1H), 5.59 (s, 1H), 3.38 (q,  $J = 7.2$  Hz, 4H), 3.04 – 2.94 (m, 2H), 1.49 – 1.37 (m, 4H), 1.14 (t,  $J = 7.0$  Hz, 6H), 0.91 (t,  $J = 6.8$

Hz, 3H).  $^{13}\text{C}$  NMR (101 MHz,  $\text{DMSO-}d_6$ )  $\delta$  182.6, 166.5, 145.3, 132.5, 130.3, 129.6, 125.8, 121.7, 89.0, 43.7, 30.5, 28.0, 22.5, 13.8, 11.2. HRMS (ESI)  $m/z$ :  $[\text{M} + \text{H}]^+$  Calcd for  $\text{C}_{17}\text{H}_{25}\text{BrNO}$  338.1114; Found 338.1098. IR: 3366, 2958, 2360, 1558, 1522, 1458, 1212, 1087, 1029, 750, 669  $\text{cm}^{-1}$ .

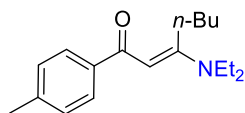

**(E)-3-diethylamino-1-(p-tolyl)hept-2-en-1-one (3r).** Prepared according to general procedure and purified by flash column chromatography to afford the product as a yellow oil. (65.52 mg, 60% yield). Eluant: ethyl acetate/petroleum ether (1:10,  $R_f$  = 0.3).  $^1\text{H}$  NMR (400 MHz,  $\text{DMSO-}d_6$ )  $\delta$  7.73 – 7.66 (m, 2H), 7.21 – 7.15 (m, 2H), 5.65 (s, 1H), 3.34 (q,  $J$  = 7.0 Hz, 4H), 3.06 – 2.93 (m, 2H), 2.31 (s, 3H), 1.49 – 1.37 (m, 4H), 1.13 (t,  $J$  = 7.0 Hz, 6H), 0.92 (t,  $J$  = 6.8 Hz, 3H).  $^{13}\text{C}$  NMR (101 MHz,  $\text{DMSO-}d_6$ )  $\delta$  184.6, 165.2, 140.4, 139.6, 128.6, 126.9, 89.4, 43.5, 30.7, 27.9, 22.6, 20.9, 13.8, 12.9. HRMS (ESI)  $m/z$ :  $[\text{M} + \text{H}]^+$  Calcd for  $\text{C}_{18}\text{H}_{28}\text{NO}$  274.2165; Found 274.2172. IR: 3343, 2933, 2360, 1604, 1524, 1472, 1225, 1089, 1025, 784  $\text{cm}^{-1}$ .

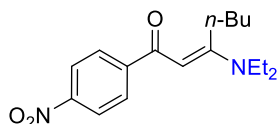

**(E)-3-diethylamino-1-(4-nitrophenyl)hept-2-en-1-one (3s).** Prepared according to general procedure and purified by flash column chromatography to afford the product as a yellow oil. (51.07 mg, 42% yield). Eluant: ethyl acetate/petroleum ether (1:5,  $R_f$  = 0.3).  $^1\text{H}$  NMR (400 MHz,  $\text{CDCl}_3$ )  $\delta$  8.24 – 8.17 (m, 2H), 7.96 – 7.88 (m, 2H), 5.59 (s, 1H), 3.40 (q,  $J$  = 7.1 Hz, 4H), 3.12 – 3.03 (m, 2H), 1.60 – 1.48 (m, 4H), 1.25 (t,  $J$  = 7.1 Hz, 6H), 0.97 (t,  $J$  = 6.8 Hz, 3H).  $^{13}\text{C}$  NMR (101 MHz,  $\text{CDCl}_3$ )  $\delta$  184.4, 168.3, 149.4, 148.6, 128.1, 123.4, 90.8, 44.5, 31.0, 29.1, 23.3, 14.0. HRMS (ESI)  $m/z$ :  $[\text{M} + \text{H}]^+$  Calcd for  $\text{C}_{17}\text{H}_{25}\text{N}_2\text{O}_3$  305.1860; Found 305.1850. IR: 2922, 2361, 1525, 1458, 1343, 1215, 1091, 848, 750, 657  $\text{cm}^{-1}$ .

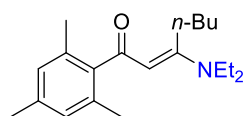

**(E)-3-diethylamino-1-mesitylhept-2-en-1-one (3t).** Prepared according to general procedure and purified by flash column chromatography to afford the product as a yellow solid. (91.50 mg, 76% yield). m. p. = 69 - 72 °C. Eluant: ethyl acetate/petroleum ether (1:10,  $R_f = 0.30$ ).  $^1\text{H}$  NMR (400 MHz,  $\text{CDCl}_3$ )  $\delta$  6.80 (s, 2H), 5.09 (s, 1H), 3.28 (q,  $J = 7.2$  Hz, 4H), 3.17 - 3.05 (m, 2H), 2.27 (s, 6H), 2.26 (s, 3H), 1.61 - 1.46 (m, 4H), 1.16 (t,  $J = 7.2$  Hz, 6H), 0.98 (t,  $J = 7.0$  Hz, 3H).  $^{13}\text{C}$  NMR (101 MHz,  $\text{CDCl}_3$ )  $\delta$  193.3, 165.6, 144.0, 136.2, 133.1, 128.0, 95.4, 43.9, 31.2, 28.6, 23.2, 21.1, 19.4, 14.0. HRMS (ESI)  $m/z$ :  $[\text{M} + \text{H}]^+$  Calcd for  $\text{C}_{20}\text{H}_{32}\text{NO}$  302.2478; Found 302.2472. IR: 3338, 2933, 2360, 1635, 1519, 1458, 1089, 1027, 796, 733  $\text{cm}^{-1}$ .

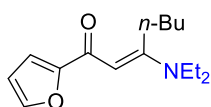

**(E)-3-diethylamino-1-(furan-2-yl)hept-2-en-1-one (3u).** Prepared according to general procedure and purified by flash column chromatography to afford the product as a yellow oil. (74.69 mg, 75% yield). Eluant: ethyl acetate/petroleum ether (1:8,  $R_f = 0.25$ ).  $^1\text{H}$  NMR (400 MHz,  $\text{CDCl}_3$ )  $\delta$  7.35 (d,  $J = 2.5$  Hz, 1H), 6.91 (d,  $J = 3.3$  Hz, 1H), 6.36 (dd,  $J = 3.4, 1.7$  Hz, 1H), 5.67 (s, 1H), 3.30 (q,  $J = 7.1$  Hz, 4H), 3.05 - 2.91 (m, 2H), 1.56 - 1.40 (m, 4H), 1.15 (t,  $J = 7.1$  Hz, 6H), 0.90 (t,  $J = 6.9$  Hz, 3H).  $^{13}\text{C}$  NMR (101 MHz,  $\text{CDCl}_3$ )  $\delta$  175.8, 166.7, 156.6, 143.0, 111.7, 111.6, 89.3, 44.0, 31.0, 29.0, 23.1, 13.8, 12.7. HRMS (ESI)  $m/z$ :  $[\text{M} + \text{H}]^+$  Calcd for  $\text{C}_{15}\text{H}_{24}\text{NO}_2$  250.1802; Found 250.1808. IR: 3359, 2958, 2933, 2360, 1611, 1524, 1460, 1090, 1010, 793  $\text{cm}^{-1}$ .

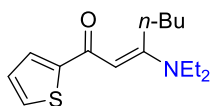

**(E)-3-diethylamino-1-(thiophen-2-yl)hept-2-en-1-one (3v).** Prepared according to general procedure and purified by flash column chromatography to afford the product as a yellow oil. (80.56 mg, 76% yield). Eluant: ethyl acetate/petroleum ether (1:8,  $R_f = 0.25$ ).  $^1\text{H}$  NMR (400 MHz,  $\text{CDCl}_3$ )  $\delta$  7.49 (d,  $J = 3.7$  Hz, 1H), 7.35 (d,  $J = 4.9$  Hz, 1H), 7.00 (dd,  $J = 5.0, 3.7$  Hz, 1H), 5.62 (s, 1H), 3.33 (q,  $J = 7.1$  Hz, 4H), 3.10 - 2.92 (m, 2H), 1.58 - 1.43 (m, 4H), 1.20 (t,  $J = 7.1$  Hz, 6H), 0.93 (t,  $J = 7.0$  Hz, 3H).  $^{13}\text{C}$  NMR (101 MHz,  $\text{CDCl}_3$ )  $\delta$  179.2, 166.3, 150.4, 129.1, 127.4, 126.9, 90.1, 44.2, 31.1,

28.9, 23.2, 14.0, 13.1. HRMS (ESI)  $m/z$ :  $[M + H]^+$  Calcd for  $C_{15}H_{24}NOS$  266.1573; Found 266.1577. IR: 3421, 2959, 2932, 2360, 1595, 1529, 1472, 1215, 1090, 783  $cm^{-1}$ .

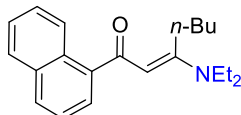

**(E)-3-diethylamino-1-(naphthalen-1-yl)hept-2-en-1-one (3w).** Prepared according to general procedure and purified by flash column chromatography to afford the product as a yellow solid. (90.23 mg, 73% yield). m. p. = 59 – 62 °C. Eluant: ethyl acetate/petroleum ether (1:10,  $R_f$  = 0.25).  $^1H$  NMR (400 MHz,  $CDCl_3$ )  $\delta$  8.34 (d,  $J$  = 7.1 Hz, 1H), 7.84 – 7.80 (m, 2H), 7.58 (d,  $J$  = 7.0 Hz, 1H), 7.51 – 7.41 (m, 3H), 5.42 (s, 1H), 3.42 – 3.27 (m, 4H), 3.23 – 3.10 (m, 2H), 1.70 – 1.51 (m, 4H), 1.19 (t,  $J$  = 7.2 Hz, 6H), 1.01 (t,  $J$  = 7.2 Hz, 3H).  $^{13}C$  NMR (101 MHz,  $CDCl_3$ )  $\delta$  190.8, 166.1, 144.1, 133.7, 130.3, 128.6, 128.0, 126.3, 126.0, 125.7, 125.0, 124.2, 95.2, 44.0, 31.2, 28.7, 23.2, 14.0, 12.6. HRMS (ESI)  $m/z$ :  $[M + H]^+$  Calcd for  $C_{21}H_{28}NO$  310.2165; Found 310.2169. IR: 2959, 2931, 2360, 1558, 1523, 1473, 1089, 785, 749, 658  $cm^{-1}$ .

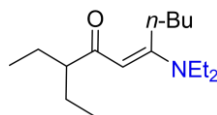

**(E)-6-diethylamino-3-ethyldec-5-en-4-one (3x).** Prepared according to general procedure and purified by flash column chromatography to afford the product as a yellow oil. (64.76 mg, 64% yield). Eluant: petroleum ether ( $R_f$  = 0.5).  $^1H$  NMR (400 MHz,  $CDCl_3$ )  $\delta$  4.96 (s, 1H), 3.24 (q,  $J$  = 7.1 Hz, 4H), 2.98 – 2.86 (m, 2H), 2.06 – 1.99 (m, 1H), 1.60 – 1.50 (m, 2H), 1.44 – 1.30 (m, 6H), 1.13 (t,  $J$  = 7.1 Hz, 6H), 0.90 (t,  $J$  = 6.4 Hz, 3H), 0.82 (t,  $J$  = 7.4 Hz, 6H).  $^{13}C$  NMR (101 MHz,  $CDCl_3$ )  $\delta$  199.6, 164.5, 94.3, 57.3, 43.8, 31.3, 28.5, 26.2, 23.2, 14.0, 13.0, 12.4. HRMS (ESI)  $m/z$ :  $[M + Na]^+$  Calcd for  $C_{16}H_{31}NNaO$  276.2298; Found 276.2289. IR: 3321, 2941, 2831, 2360, 1525, 1457, 1356, 1022, 736, 669  $cm^{-1}$ .

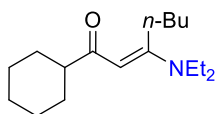

**(E)-1-cyclohexyl-3-(diethylamino)hept-2-en-1-one (3y).** Prepared according to general procedure and purified by flash column chromatography to afford the product as a yellow oil. (50.88 mg, 48% yield). Eluant: petroleum ether ( $R_f = 0.5$ ).  $^1\text{H}$  NMR (400 MHz,  $\text{CDCl}_3$ )  $\delta$  4.96 (s, 1H), 3.24 (q,  $J = 7.2$  Hz, 4H), 2.98 – 2.81 (m, 2H), 2.17 – 2.10 (m, 1H), 1.70 – 1.77 (m, 4H), 1.44 – 1.11 (m, 16H), 0.89 (t,  $J = 5.0$  Hz, 3H).  $^{13}\text{C}$  NMR (101 MHz,  $\text{CDCl}_3$ )  $\delta$  199.7, 164.9, 92.3, 52.5, 43.7, 31.2, 30.2, 28.6, 26.4, 26.2, 23.2, 14.0, 13.2. HRMS (ESI)  $m/z$ :  $[\text{M} + \text{Na}]^+$  Calcd for  $\text{C}_{17}\text{H}_{31}\text{NNaO}$  299.2298; Found 288.2292. IR: 3357, 2929, 2855, 2360, 1615, 1525, 1449, 1089, 1030, 735  $\text{cm}^{-1}$ .

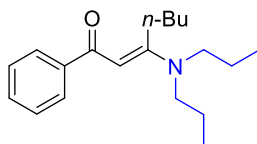

**(E)-3-dipropylamino-1-phenylhept-2-en-1-one (3z).** Prepared according to general procedure and purified by flash column chromatography to afford the product as a yellow oil. (80.36 mg, 70% yield). Eluant: ethyl acetate/petroleum ether (1:10,  $R_f = 0.30$ ).  $^1\text{H}$  NMR (400 MHz, Chloroform- $d$ )  $\delta$  7.84 – 7.80 (m, 2H), 7.39 – 7.34 (m, 3H), 5.65 (s, 1H), 3.23 (t,  $J = 7.8$  Hz, 4H), 3.13 – 3.02 (m, 2H), 1.71 – 1.60 (m, 4H), 1.58 – 1.47 (m, 4H), 0.98 – 0.91 (m, 9H).  $^{13}\text{C}$  NMR (101 MHz,  $\text{CDCl}_3$ )  $\delta$  187.0, 166.9, 143.5, 130.0, 128.0, 127.2, 91.2, 52.1, 31.1, 28.8, 23.2, 20.8, 14.0, 11.4. HRMS (ESI)  $m/z$ :  $[\text{M} + \text{H}]^+$  Calcd for  $\text{C}_{19}\text{H}_{30}\text{NO}$  288.2322; Found 288.2332. IR: 2958, 2361, 1621, 1520, 1458, 1205, 1088, 765, 701, 666  $\text{cm}^{-1}$ .

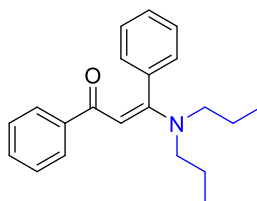

**(E)-3-dipropylamino-1,3-diphenylprop-2-en-1-one (3aa).** Prepared according to general procedure and purified by flash column chromatography to afford the product as a yellow oil. (88.41 mg, 72% yield). Eluant: ethyl acetate/petroleum ether (1:10,  $R_f = 0.30$ ).  $^1\text{H}$  NMR (400 MHz,  $\text{DMSO}-d_6$ )  $\delta$  7.74 (d,  $J = 6.5$  Hz, 2H), 7.44 – 7.36 (m, 6H), 7.16 – 7.11 (m, 2H), 5.93 (s, 1H), 3.51 – 2.73 (m, 4H), 1.86 – 1.26 (m, 4H), 1.09 – 0.52 (m, 6H).  $^{13}\text{C}$  NMR (101 MHz,  $\text{DMSO}-d_6$ )  $\delta$  184.6, 162.9, 141.9, 137.2, 130.5,

128.1, 128.1, 128.0, 127.8, 127.0, 92.5, 51.2, 19.1, 11.2. HRMS (ESI)  $m/z$ :  $[M + Na]^+$  Calcd for  $C_{21}H_{25}NNaO$  330.1828; Found 330.1819. IR: 3411, 2962, 2360, 1630, 1514, 1208, 1051, 1024, 1004,  $764\text{ cm}^{-1}$ .

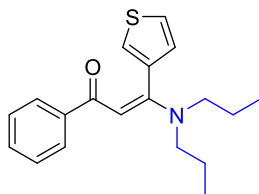

**(E)-3-dipropylamino-1-phenyl-3-(thiophen-3-yl)prop-2-en-1-one (3ab).** Prepared according to general procedure and purified by flash column chromatography to afford the product as a yellow oil. (95.15 mg, 76% yield). Eluant: ethyl acetate/petroleum ether (1:10,  $R_f = 0.30$ ).  $^1H$  NMR (400 MHz,  $DMSO-d_6$ )  $\delta$  7.76 – 7.69 (m, 2H), 7.54 (dd,  $J = 4.9, 2.9$  Hz, 1H), 7.43 – 7.36 (m, 3H), 7.31 (dd,  $J = 2.9, 1.3$  Hz, 1H), 6.91 (dd,  $J = 4.9, 1.3$  Hz, 1H), 5.91 (s, 1H), 3.27 – 3.02 (m, 4H), 1.67 – 1.50 (m, 4H), 0.79 (t,  $J = 7.2$  Hz, 6H).  $^{13}C$  NMR (101 MHz,  $DMSO-d_6$ )  $\delta$  184.8, 158.0, 141.9, 136.6, 130.4, 128.2, 128.1, 127.0, 125.6, 123.7, 93.3, 51.5, 20.3, 11.2. HRMS (ESI)  $m/z$ :  $[M + Na]^+$  Calcd for  $C_{19}H_{23}NNaOS$  336.1393; Found 336.1382. IR: 3380, 2964, 2360, 1624, 1508, 1433, 1206, 1049, 765,  $702\text{ cm}^{-1}$ .

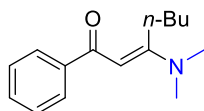

**(E)-3-dimethylamino-1-phenylhept-2-en-1-one (3ac).** Prepared according to general procedure and purified by flash column chromatography to afford the product as a yellow oil. (42.51 mg, 46% yield). Eluant: ethyl acetate/petroleum ether (1:10,  $R_f = 0.30$ ).  $^1H$  NMR (400 MHz,  $DMSO-d_6$ )  $\delta$  7.85 – 7.79 (m, 2H), 7.44 – 7.36 (m, 3H), 5.61 (s, 1H), 3.14 – 3.01 (m, 8H), 1.49 – 1.39 (m, 4H), 0.92 (t,  $J = 6.8$  Hz, 3H).  $^{13}C$  NMR (101 MHz,  $DMSO-d_6$ )  $\delta$  185.0, 167.2, 142.8, 130.1, 128.0, 127.0, 90.4, 29.7, 28.0, 22.5, 13.8, 13.7. HRMS (ESI)  $m/z$ :  $[M + H]^+$  Calcd for  $C_{15}H_{22}NO$  232.1696; Found 232.1688. IR: 2954, 2929, 2361, 1621, 1525, 1431, 1225, 762, 700,  $656\text{ cm}^{-1}$ .

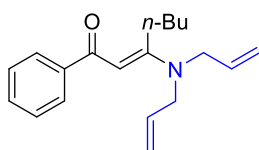

**(E)-3-diallylamino-1-phenylhept-2-en-1-one (3ad).** Prepared according to general procedure and purified by flash column chromatography to afford the product as a yellow oil. (35.09 mg, 31% yield). Eluant: ethyl acetate/petroleum ether (1:15,  $R_f = 0.30$ ).  $^1\text{H}$  NMR (400 MHz,  $\text{DMSO-}d_6$ )  $\delta$  7.77 (d,  $J = 7.1$  Hz, 2H), 7.45 – 7.36 (m, 3H), 5.91 – 5.82 (m, 2H), 5.74 (s, 1H), 5.21 (d,  $J = 10.3$  Hz, 2H), 5.15 (d,  $J = 17.2$  Hz, 2H), 4.03 – 3.93 (m, 4H), 3.08 – 2.95 (m, 2H), 1.53 – 1.38 (m, 4H), 0.92 (t,  $J = 7.0$  Hz, 3H).  $^{13}\text{C}$  NMR (101 MHz,  $\text{DMSO-}d_6$ )  $\delta$  185.3, 166.5, 142.6, 133.6, 130.2, 128.1, 126.9, 116.4, 91.0, 51.9, 30.7, 28.1, 22.6, 13.8. HRMS (ESI)  $m/z$ :  $[\text{M} + \text{Na}]^+$  Calcd for  $\text{C}_{19}\text{H}_{25}\text{NNaO}$  306.1828; Found 306.1834. IR: 3380, 2964, 2360, 1624, 1508, 1433, 1206, 1049, 765, 702  $\text{cm}^{-1}$ .

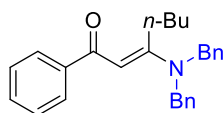

**(E)-3-dibenzylamino-1-phenylhept-2-en-1-one (3ae).** Prepared according to general procedure and purified by flash column chromatography to afford the product as a yellow oil. (45.56 mg, 30% yield). Eluant: ethyl acetate/petroleum ether (1:10,  $R_f = 0.30$ ).  $^1\text{H}$  NMR (400 MHz,  $\text{CDCl}_3$ )  $\delta$  7.67 (d,  $J = 8.0$  Hz, 2H), 7.43 – 7.29 (m, 9H), 7.21 (d,  $J = 7.4$  Hz, 4H), 5.91 (s, 1H), 4.63 (s, 4H), 3.33 – 3.21 (m, 2H), 1.78 – 1.69 (m, 2H), 1.61 – 1.49 (m, 2H), 0.99 (t,  $J = 7.3$  Hz, 3H).  $^{13}\text{C}$  NMR (101 MHz,  $\text{CDCl}_3$ )  $\delta$  188.1, 167.4, 142.8, 136.4, 130.4, 129.0, 128.0, 127.7, 127.3, 126.5, 93.2, 53.1, 31.4, 29.1, 23.3, 14.0. HRMS (ESI)  $m/z$ :  $[\text{M} + \text{Na}]^+$  Calcd for  $\text{C}_{27}\text{H}_{29}\text{NNaO}$  406.2141; Found 406.2130. IR: 3446, 2956, 2360, 1623, 1518, 1458, 1196, 1093, 920, 766, 703, 669  $\text{cm}^{-1}$ .

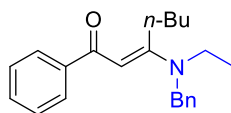

**(E)-3-(benzyl(ethyl)amino)-1-phenylhept-2-en-1-one (3af).** Prepared according to general procedure and purified by flash column chromatography to afford the product as a yellow oil. (47.51 mg, 37% yield). Eluant: acetone/dichloromethane/petroleum ether (1:80:200,  $R_f = 0.35$ ).  $^1\text{H}$  NMR (400 MHz,  $\text{DMSO-}d_6$ )  $\delta$  7.82 – 7.51 (m, 2H), 7.41 – 7.32 (m, 5H), 7.28 – 7.21 (m, 3H), 5.71 (s, 1H), 4.63 (s, 2H), 3.46 (q,  $J = 7.2$  Hz, 2H), 3.15 – 2.98 (m, 2H), 1.60 – 1.37 (m, 4H), 1.17 (t,  $J = 7.0$  Hz, 3H), 0.91 (t,  $J$

= 7.0 Hz, 3H).  $^{13}\text{C}$  NMR (101 MHz,  $\text{DMSO-}d_6$ )  $\delta$  185.2, 166.1, 142.7, 137.5, 130.1, 128.7, 128.0, 127.1, 126.9, 126.2, 91.1, 65.0, 52.2, 45.0, 30.7, 28.2, 22.6, 13.8. HRMS (ESI)  $m/z$ :  $[\text{M} + \text{Na}]^+$  Calcd for  $\text{C}_{22}\text{H}_{27}\text{NNaO}$  344.1985; Found 344.1992. IR: 2956, 2360, 1597, 1521, 1450, 1355, 1211, 1089, 765, 695  $\text{cm}^{-1}$

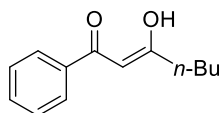

**(Z)-3-hydroxy-1-phenylhept-2-en-1-one (4a).**<sup>[15]</sup> Prepared according to procedure and purified by flash column chromatography to afford the product as a brown oil. (74.25 mg, 91% yield). Eluant: ethyl acetate/petroleum ether (1:100,  $R_f = 0.35$ ).  $^1\text{H}$  NMR (400 MHz,  $\text{CDCl}_3$ )  $\delta$  7.88 (d,  $J = 7.1$  Hz, 2H), 7.53 – 7.40 (m, 3H), 6.17 (s, 1H), 2.42 (t,  $J = 7.6$  Hz, 2H), 1.70 – 1.62 (m, 2H), 1.44 – 1.35 (m, 2H), 0.94 (t,  $J = 7.3$  Hz, 3H).  $^{13}\text{C}$  NMR (101 MHz,  $\text{CDCl}_3$ )  $\delta$  197.1, 183.5, 135.1, 132.2, 128.6, 127.0, 96.1, 39.0, 28.0, 22.4, 13.9.

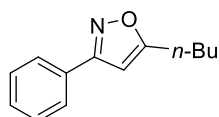

**5-butyl-3-phenylisoxazole (4b).**<sup>[16]</sup> Prepared according to procedure and purified by flash column chromatography to afford the product as a white oil. (61.10 mg, 76% yield). Eluant: ethyl acetate/petroleum ether (1:50,  $R_f = 0.35$ ).  $^1\text{H}$  NMR (400 MHz,  $\text{CDCl}_3$ )  $\delta$  7.76 (d,  $J = 8.0$  Hz, 2H), 7.47 – 7.38 (m, 3H), 6.37 (s, 1H), 2.71 (t,  $J = 7.6$  Hz, 2H), 1.73 – 1.66 (m, 2H), 1.47 – 1.38 (m, 2H), 0.96 (t,  $J = 7.4$  Hz, 3H).  $^{13}\text{C}$  NMR (101 MHz,  $\text{CDCl}_3$ )  $\delta$  169.6, 164.9, 130.0, 129.0, 127.8, 125.8, 99.2, 30.5, 25.9, 22.4, 13.9.

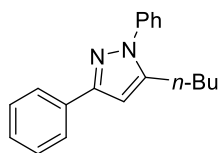

**5-butyl-1,3-diphenyl-1H-pyrazole (4c).**<sup>[14]</sup> Prepared according to procedure and purified by flash column chromatography to afford the product as a white oil. (89.42 mg, 81% yield). Eluant: ethyl acetate/petroleum ether (1:50,  $R_f = 0.35$ ).  $^1\text{H}$  NMR (400 MHz,  $\text{CDCl}_3$ )  $\delta$  7.34 – 7.21 (m, 10H), 6.35 (s, 1H), 2.76 (t,  $J = 7.6$  Hz, 2H), 1.79 – 1.71 (m, 2H), 1.53 – 1.43 (m, 2H), 0.99 (t,  $J = 7.3$  Hz, 3H).  $^{13}\text{C}$  NMR (101 MHz,

$\text{CDCl}_3$ )  $\delta$  154.3, 143.5, 140.2, 130.9, 128.9, 128.7, 128.4, 128.0, 127.1, 125.2, 106.8, 31.9, 28.1, 22.7, 14.1.

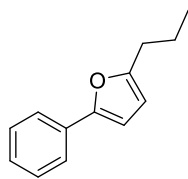

**2-phenyl-5-propylfuran (5).**<sup>[11]</sup> Eluant: ethyl acetate/petroleum ether (1:00,  $R_f$  = 0.35).  $^1\text{H}$  NMR (400 MHz,  $\text{CDCl}_3$ )  $\delta$  7.58 – 7.53 (m, 2H), 7.29 – 7.25 (m, 2H), 7.16 – 7.10 (m, 1H), 6.47 (d,  $J$  = 3.2 Hz, 1H), 6.00 – 5.97 (m, 1H), 2.62 – 2.55 (m, 2H), 1.64 (q,  $J$  = 7.4 Hz, 2H), 0.92 (t,  $J$  = 7.4 Hz, 3H).  $^{13}\text{C}$  NMR (101 MHz,  $\text{CDCl}_3$ )  $\delta$  156.4, 152.3, 131.4, 128.7, 126.8, 123.5, 107.1, 105.8, 30.3, 21.6, 13.9.

## 5. References

- [1] D. Zhai and S. Ma, *Org. Chem. Front.*, 2019, **6**, 3101.
- [2] K. N. Tu, S. Kim and S. A. Blum, *Org. Lett.*, 2019, **21**, 1283.
- [3] E. L. Perera , D. J. Wink, Y. Luo, Y. Xia and D. Lee, *J. Org. Chem.*, 2024, **89**, 4496.
- [4] X. Liu, X. Li, L. Liu, et al., *ACS Catal.*, 2023, **13**, 5819.
- [5] K. N. Tu, J. J. Hirner and S. A. Blum, *Org. Lett.*, 2016, **18**, 480.
- [6] X. Luo and P. Wang, *Org. Lett.*, 2021, **23**, 4960.
- [7] K. Zhang, Y. Yao, W. Sun, et al., *Chem. Commun.*, 2021, **57**, 13020.
- [8] J. Miao, B. Huang, H. Liu and M. Cai, *RSC Adv.*, 2017, **7**, 42570.
- [9] B. Liang, M. Huang, Z. You, et al., *J. Org. Chem.*, 2005, **70**, 6097.
- [10] I. R. Baxendale, S. C. Schou, J. Sedelmeier, S. V. Ley, *Chem. Eur. J.*, 2010, **16**, 89.
- [11] X. Hu, B. Zhou, H. Jin, Y. Liu and L. Zhang, *Chem. Commun.*, 2020, **56**, 7297.
- [12] R. K. Shiroodi, M. Soltani and V. Gevorgyan, *J. Am. Chem. Soc.*, 2014, **136**, 9882.
- [13] L. Zygalski, C. Middel, K. Harms and U. Koert, *Org. Lett.*, 2018, **20**, 5071.
- [14] M. Zhao, L. Wang, Y. Zhou, et al., *Adv. Synth. Catal.*, 2024, **366**, 4634.
- [15] C. Tarigopula, G. K. Thota, R. Balamurugan, *Eur. J. Org. Chem.*, 2016, **2016**, 5855.
- [16] O. Debleds, E. Gayon, E. Ostaszuk, E. Vrancken, J.-M. Campagne, *Chem. Eur. J.*, 2010, **16**, 12207.

## 6. NMR spectra

$^1\text{H}$  NMR spectrum of compound **1h** (400 MHz,  $\text{CDCl}_3$ )

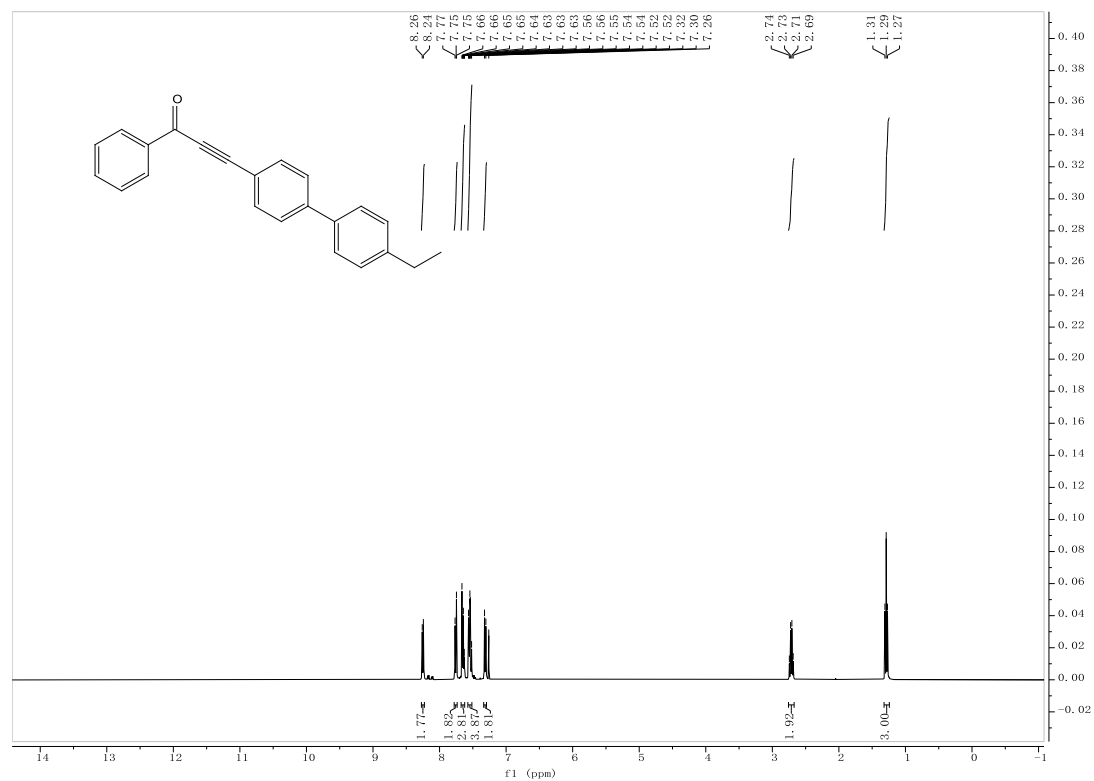

$^{13}\text{C}$  NMR spectrum of compound **1h** (101 MHz,  $\text{CDCl}_3$ )

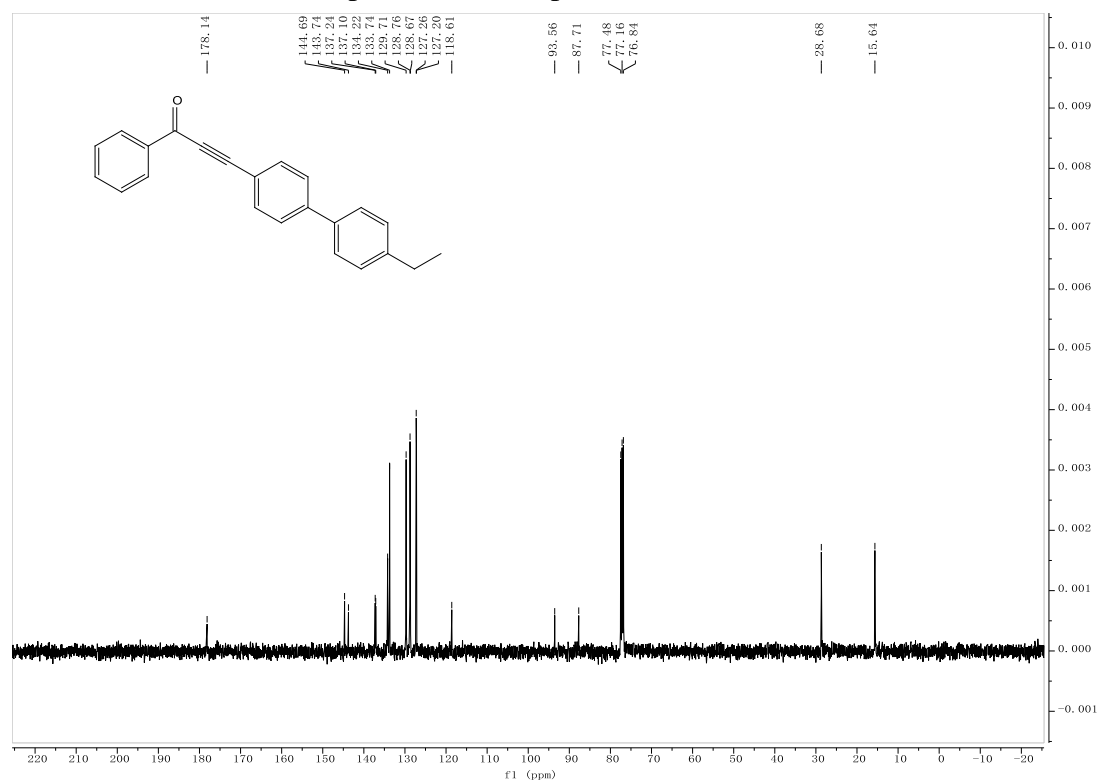

<sup>1</sup>H NMR spectrum of compound **1j** (400 MHz, CDCl<sub>3</sub>)

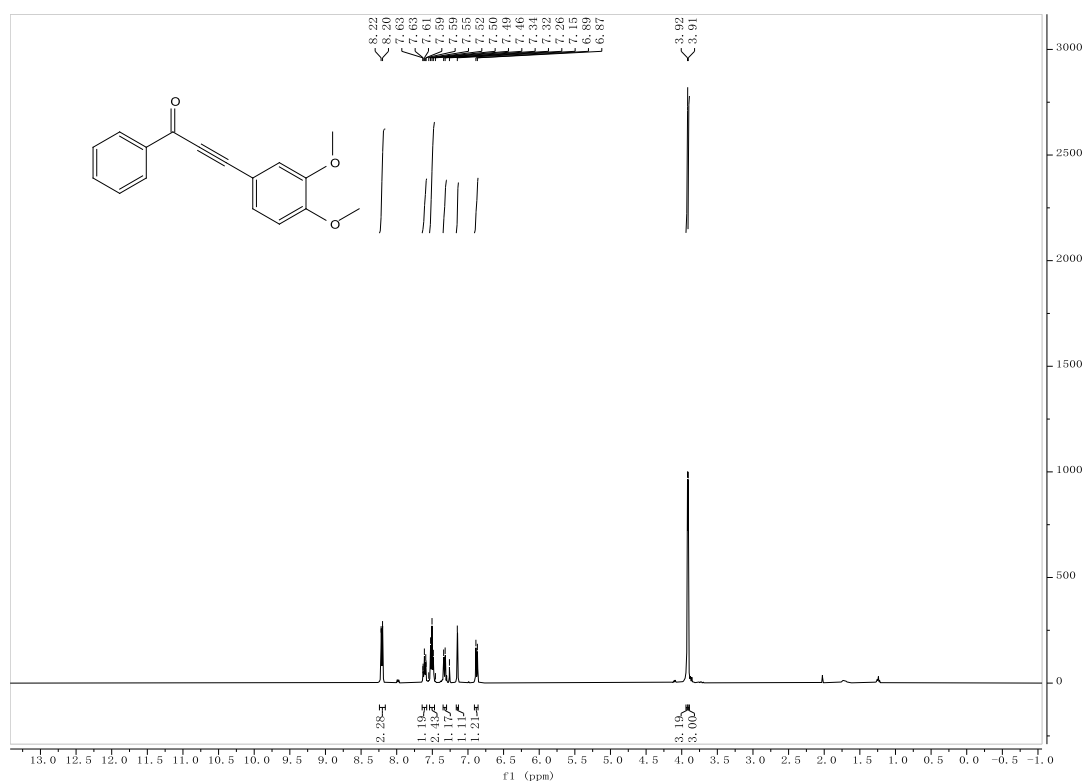

<sup>13</sup>C NMR spectrum of compound **1j** (101 MHz, CDCl<sub>3</sub>)

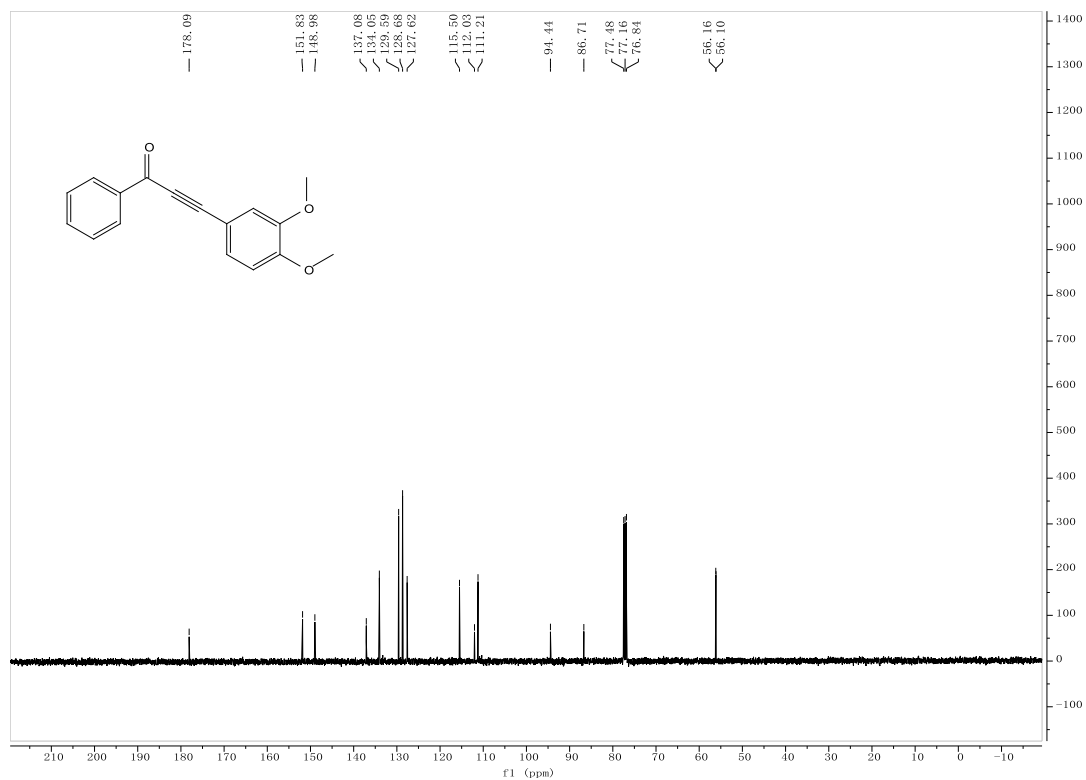

<sup>1</sup>H NMR spectrum of compound **1x** (400 MHz, CDCl<sub>3</sub>)

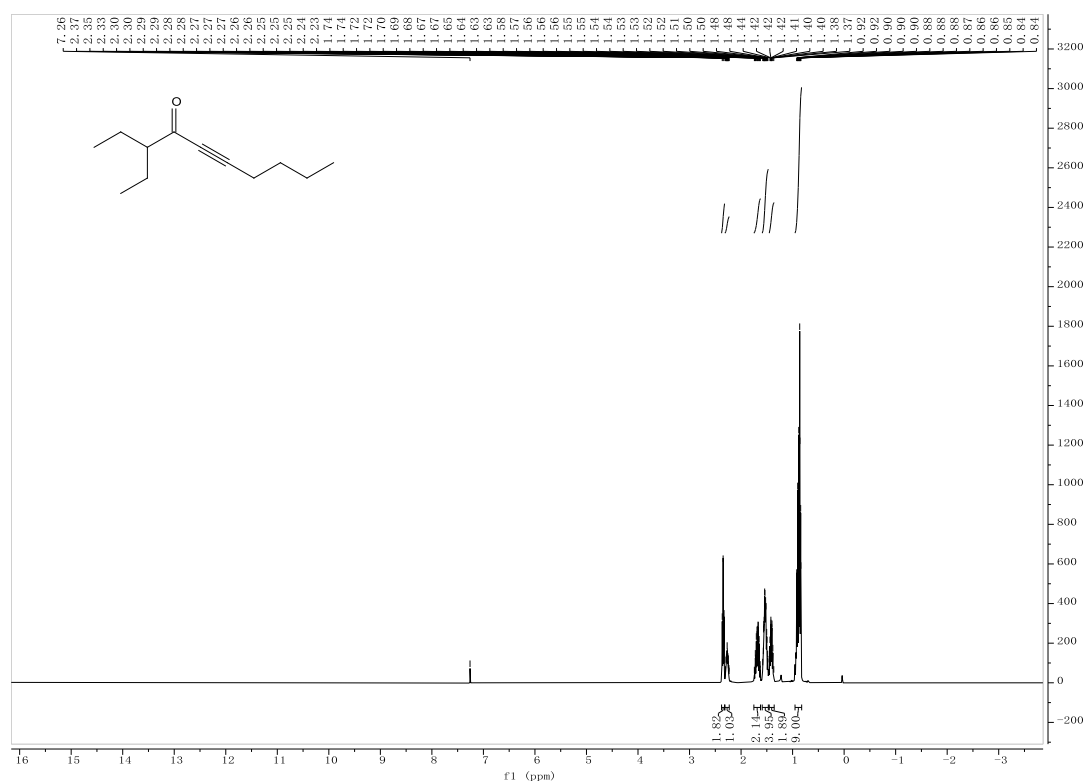

$^1\text{H}$  NMR spectrum of compound **3a** (400 MHz,  $\text{CDCl}_3$ )

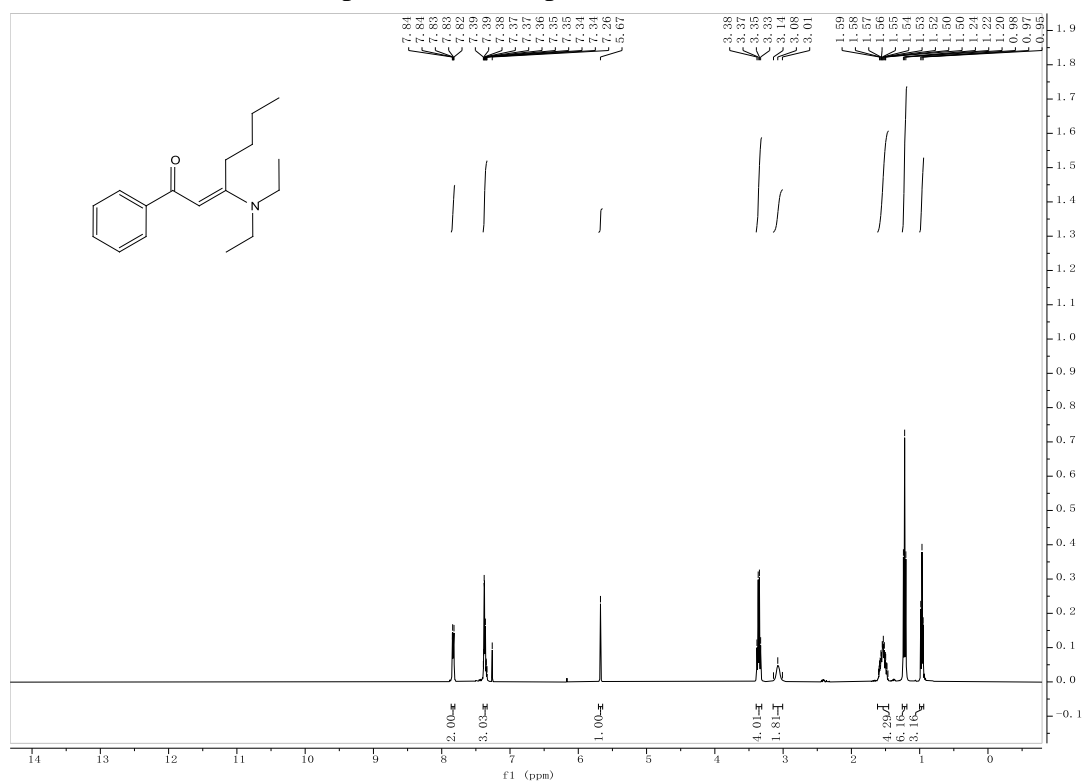

$^{13}\text{C}$  NMR spectrum of compound **3a** (101 MHz,  $\text{CDCl}_3$ )

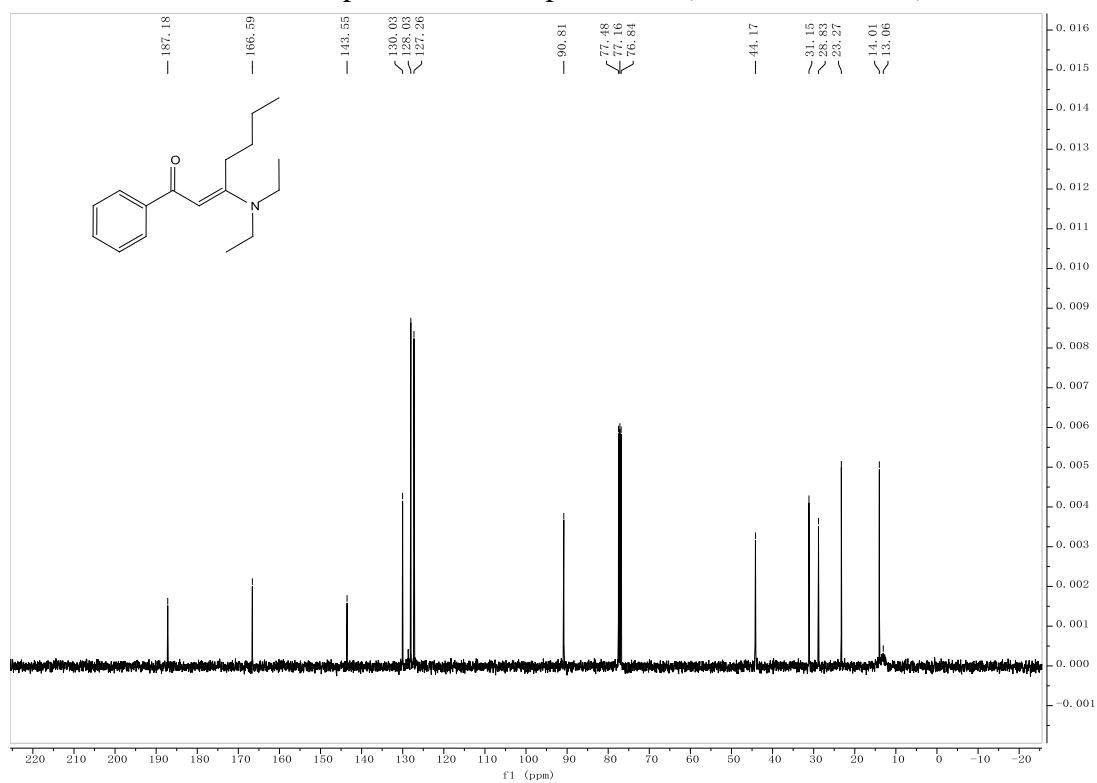

<sup>1</sup>H NMR spectrum of compound **3b** (400 MHz, CDCl<sub>3</sub>)

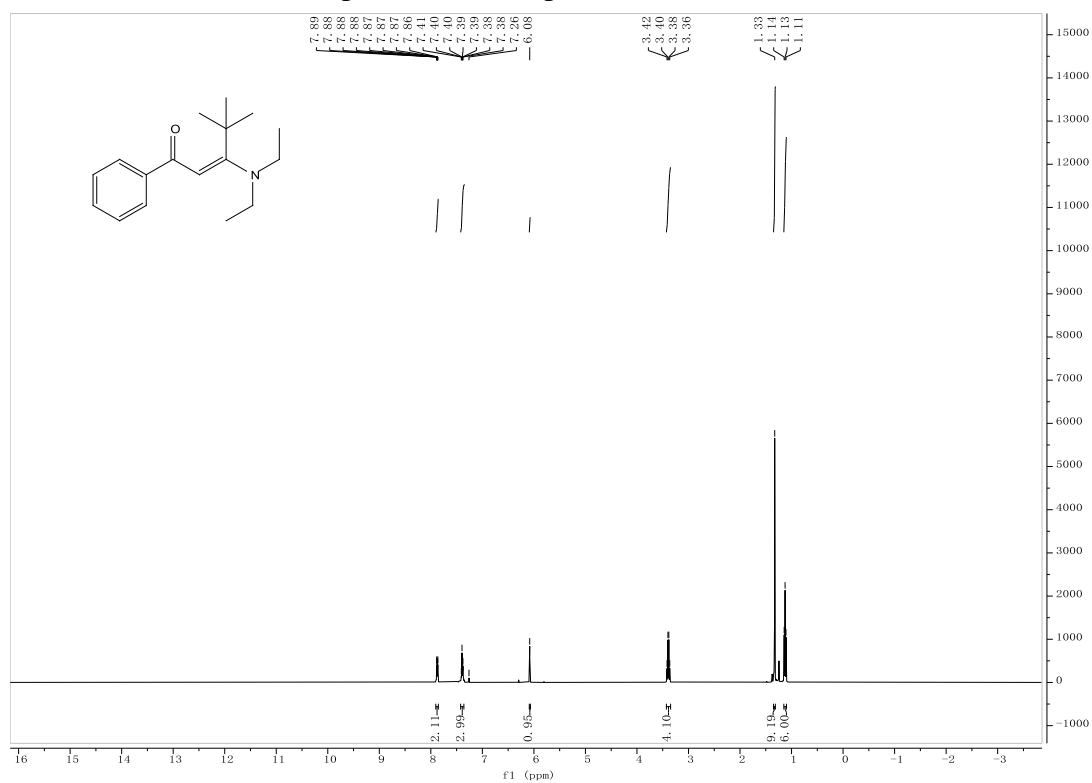

<sup>13</sup>C NMR spectrum of compound **3b** (101 MHz, CDCl<sub>3</sub>)

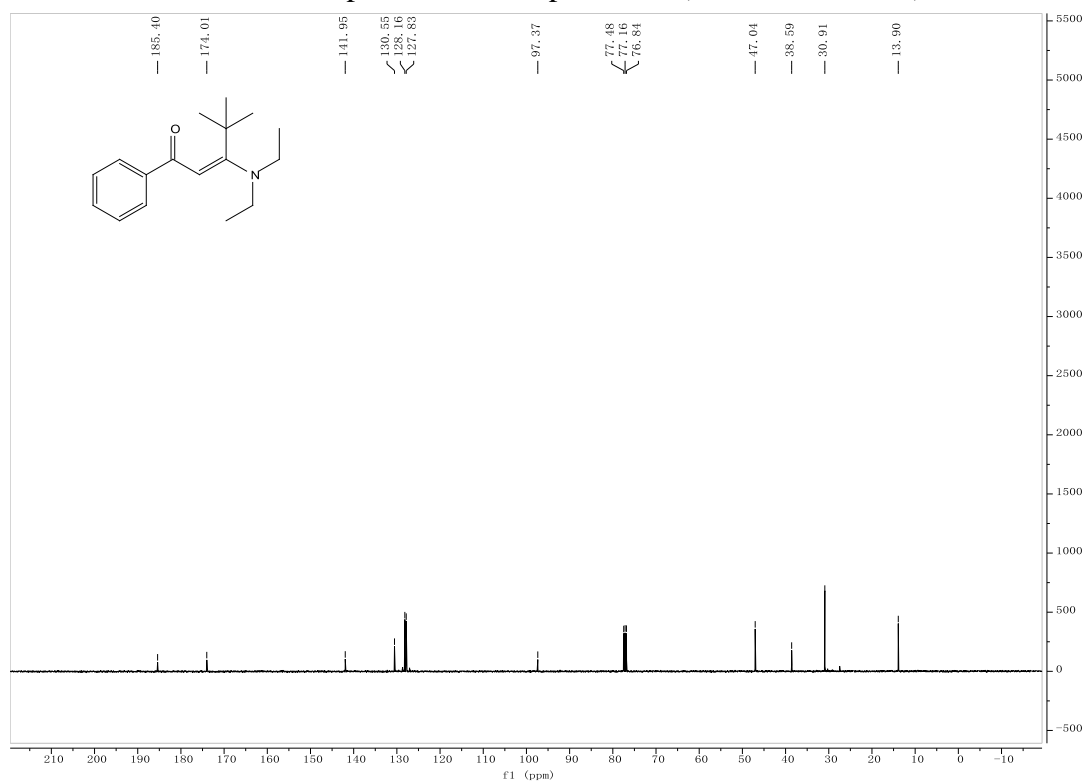

$^1\text{H}$  NMR spectrum of compound **3c** (400 MHz,  $\text{CDCl}_3$ )

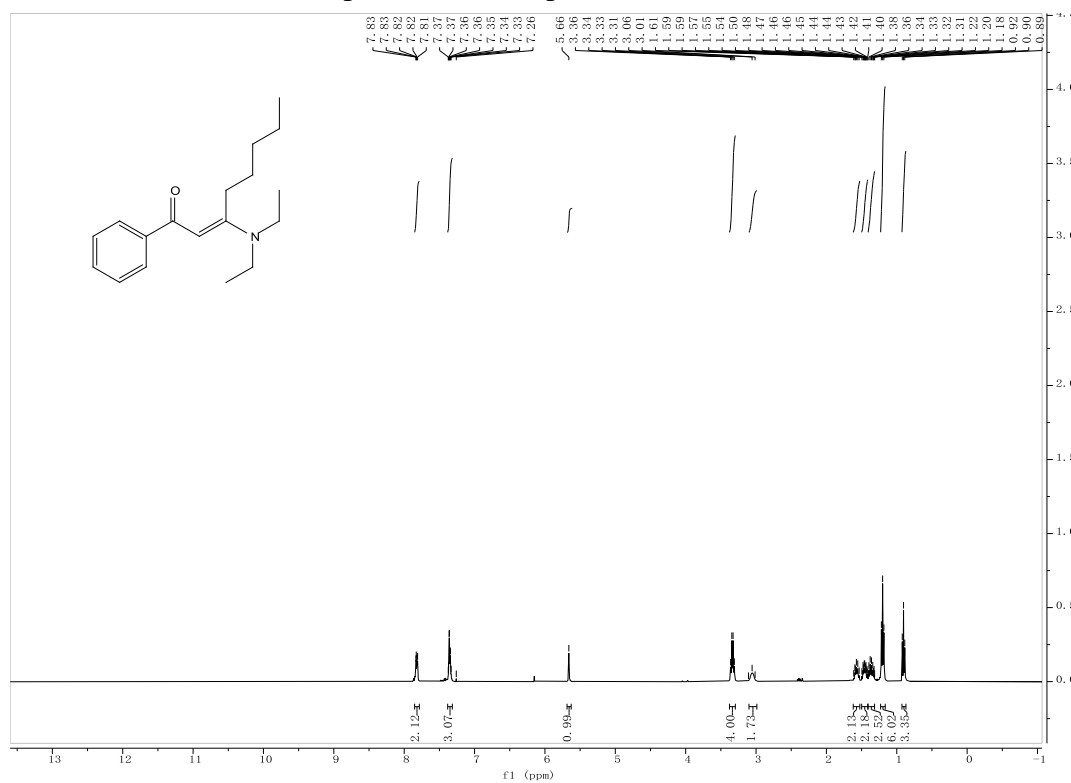

$^{13}\text{C}$  NMR spectrum of compound **3c** (101 MHz,  $\text{CDCl}_3$ )

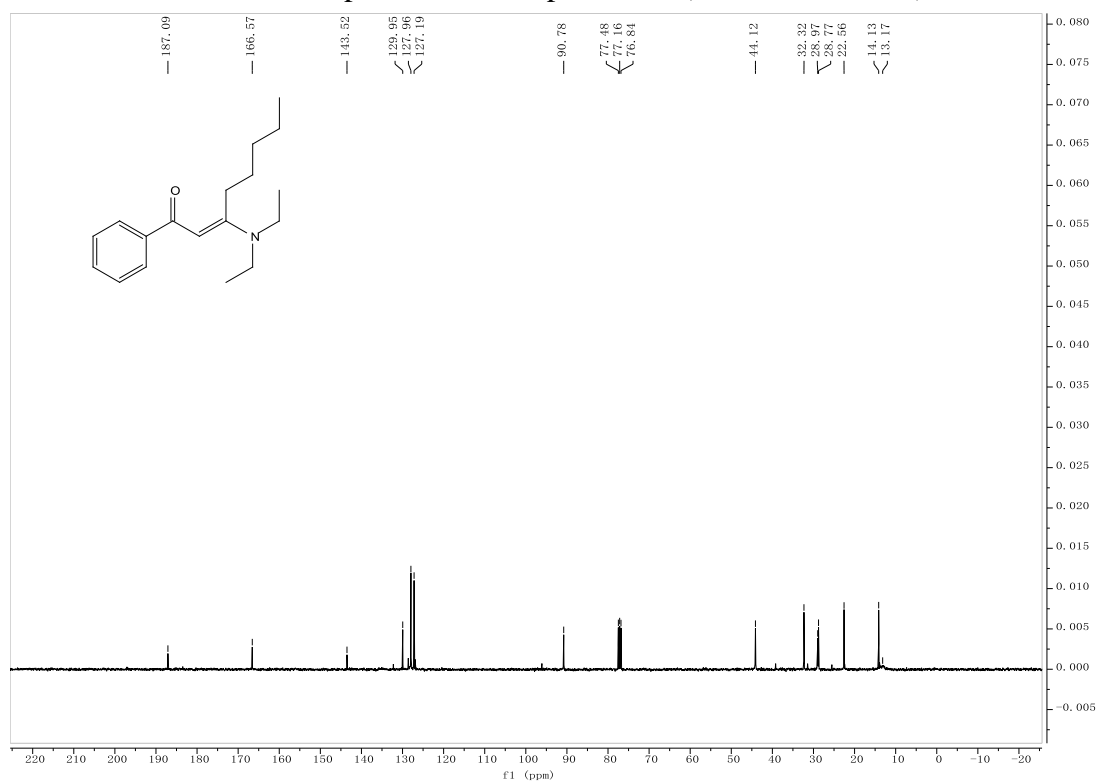

<sup>1</sup>H NMR spectrum of compound **3d** (400 MHz, CDCl<sub>3</sub>)

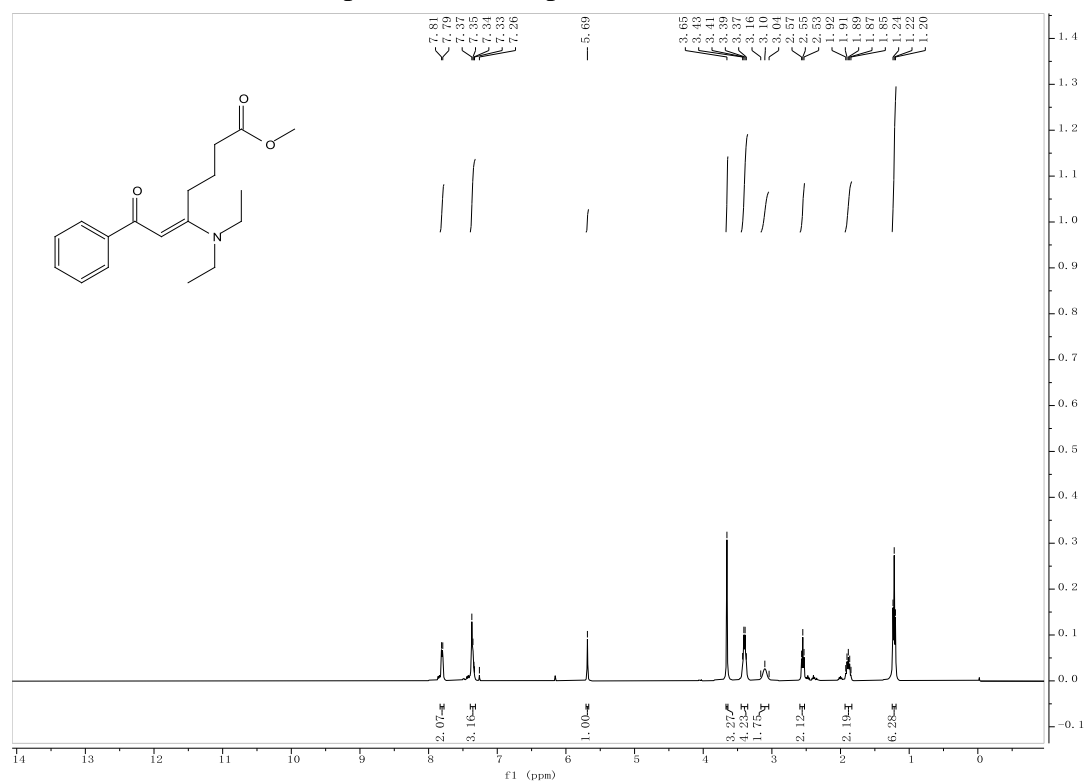

<sup>13</sup>C NMR spectrum of compound **3d** (101 MHz, CDCl<sub>3</sub>)

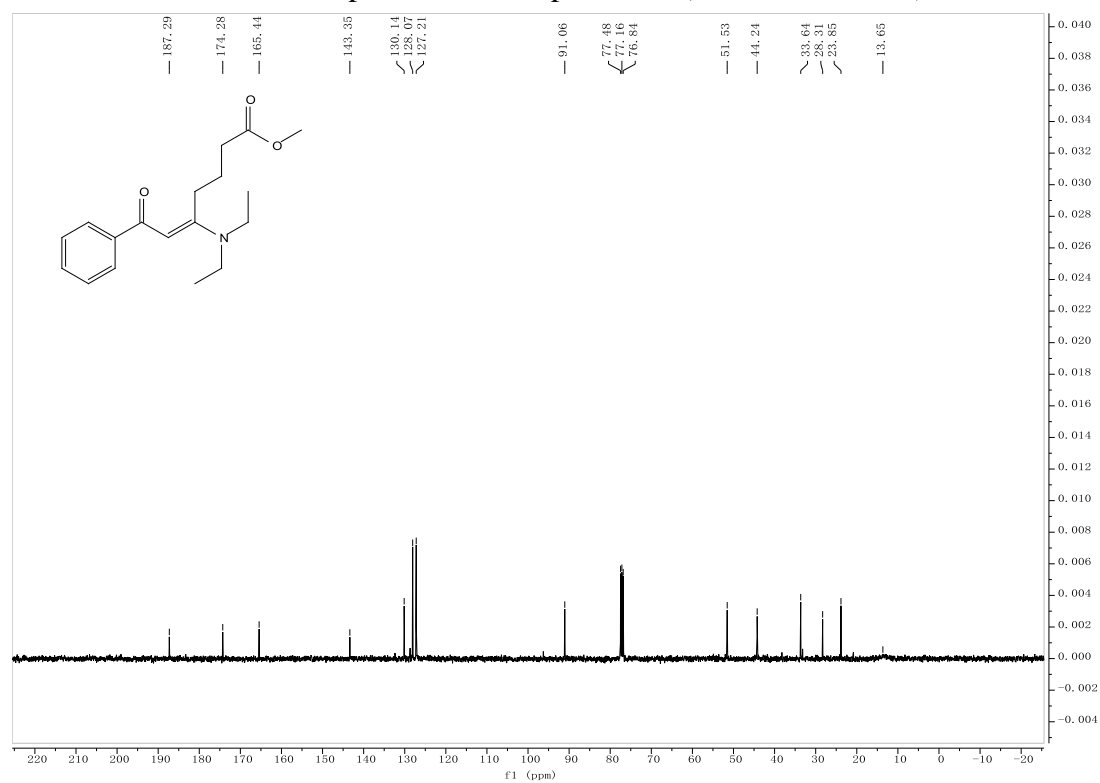

$^1\text{H}$  NMR spectrum of compound **3e** (400 MHz,  $\text{CDCl}_3$ )

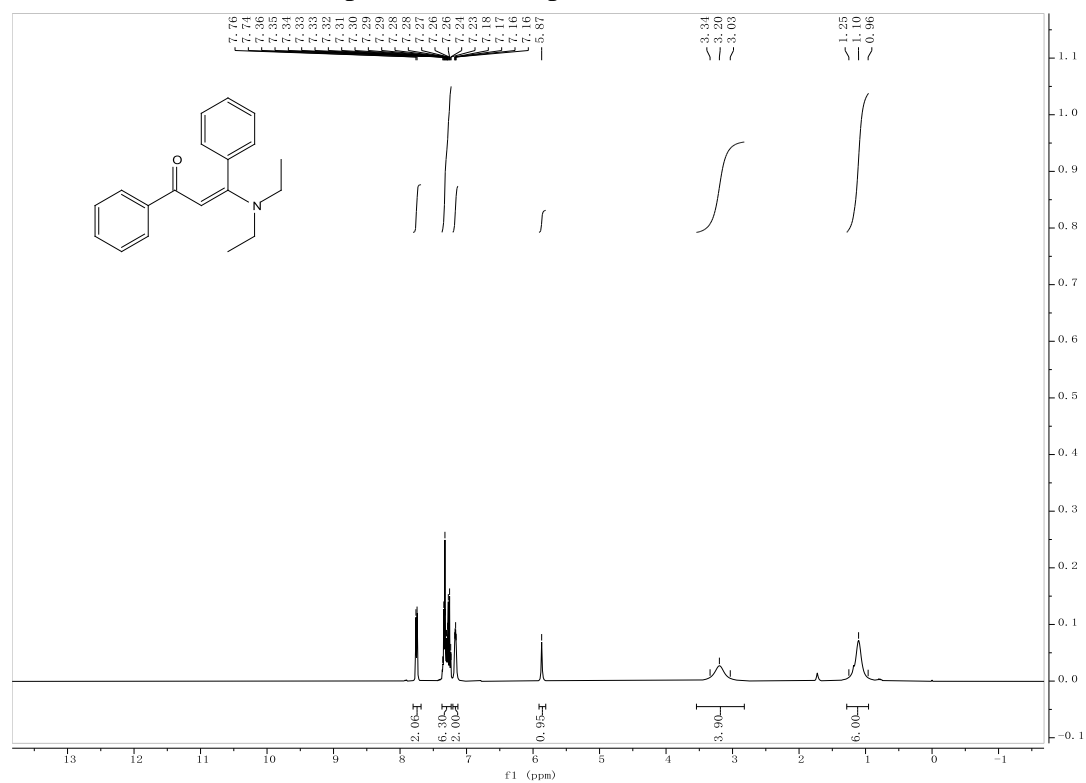

$^{13}\text{C}$  NMR spectrum of compound **3e** (101 MHz,  $\text{CDCl}_3$ )

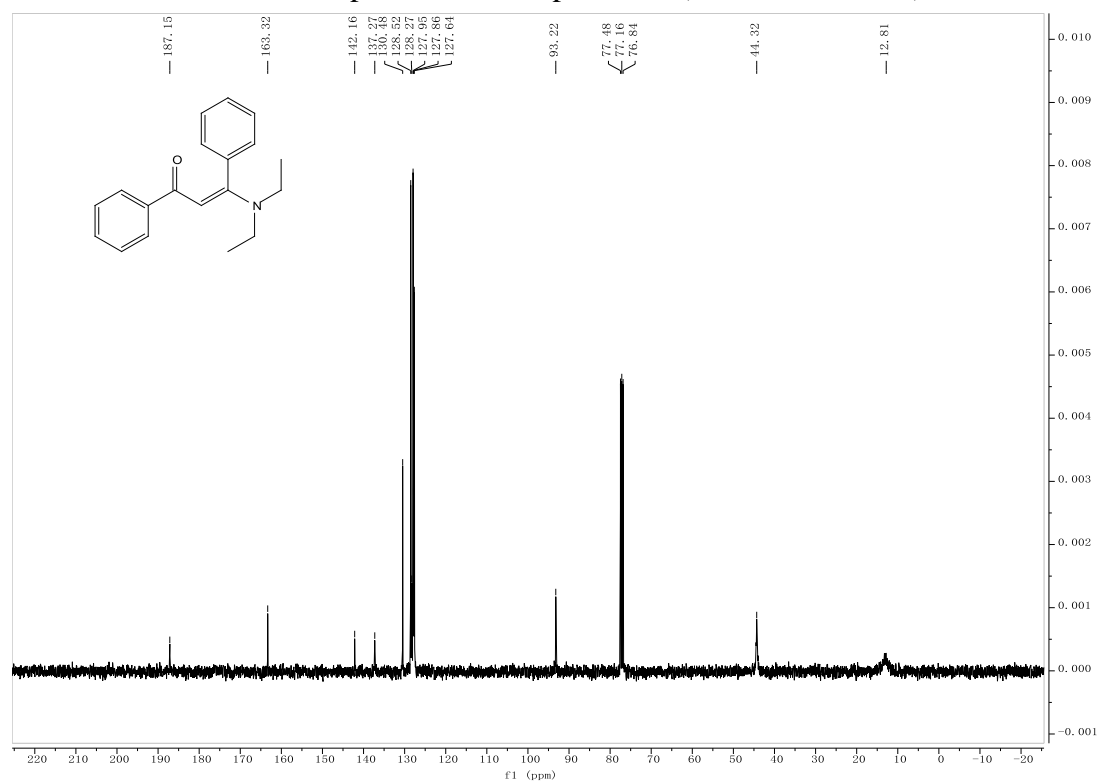

### <sup>1</sup>H NMR spectrum of compound **3f** (400 MHz, CDCl<sub>3</sub>)

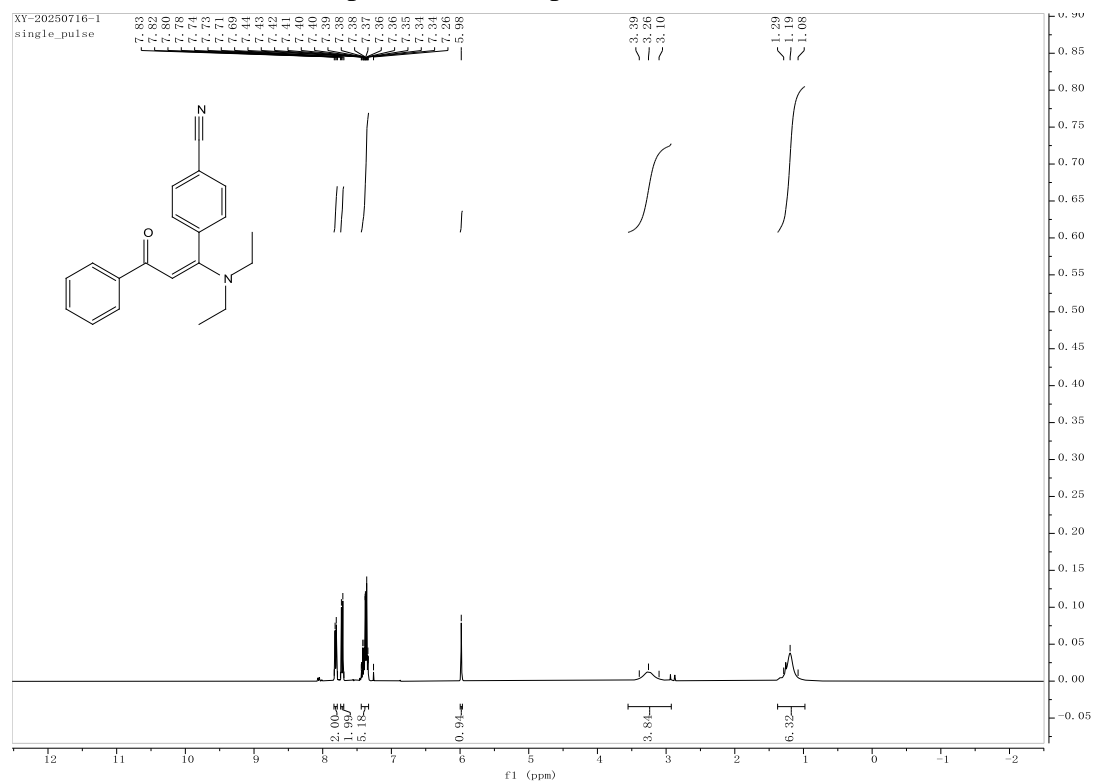

### <sup>13</sup>C NMR spectrum of compound **3f** (101 MHz, CDCl<sub>3</sub>)

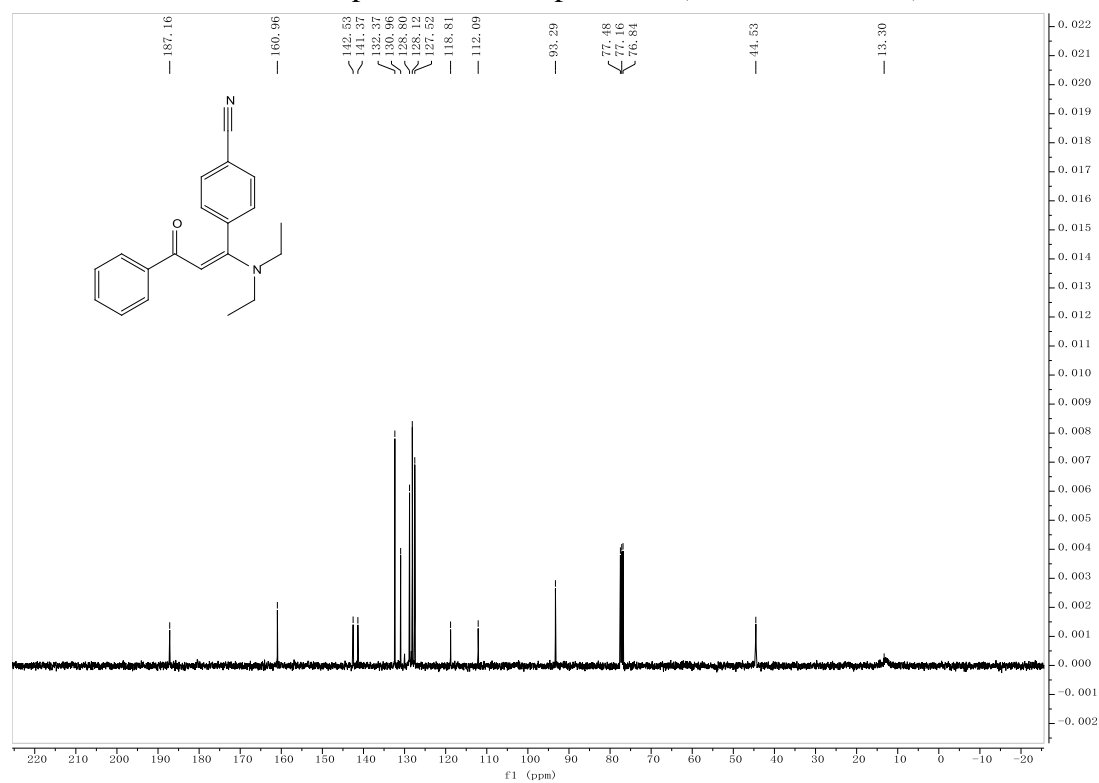

<sup>1</sup>H NMR spectrum of compound **3g** (400 MHz, CDCl<sub>3</sub>)

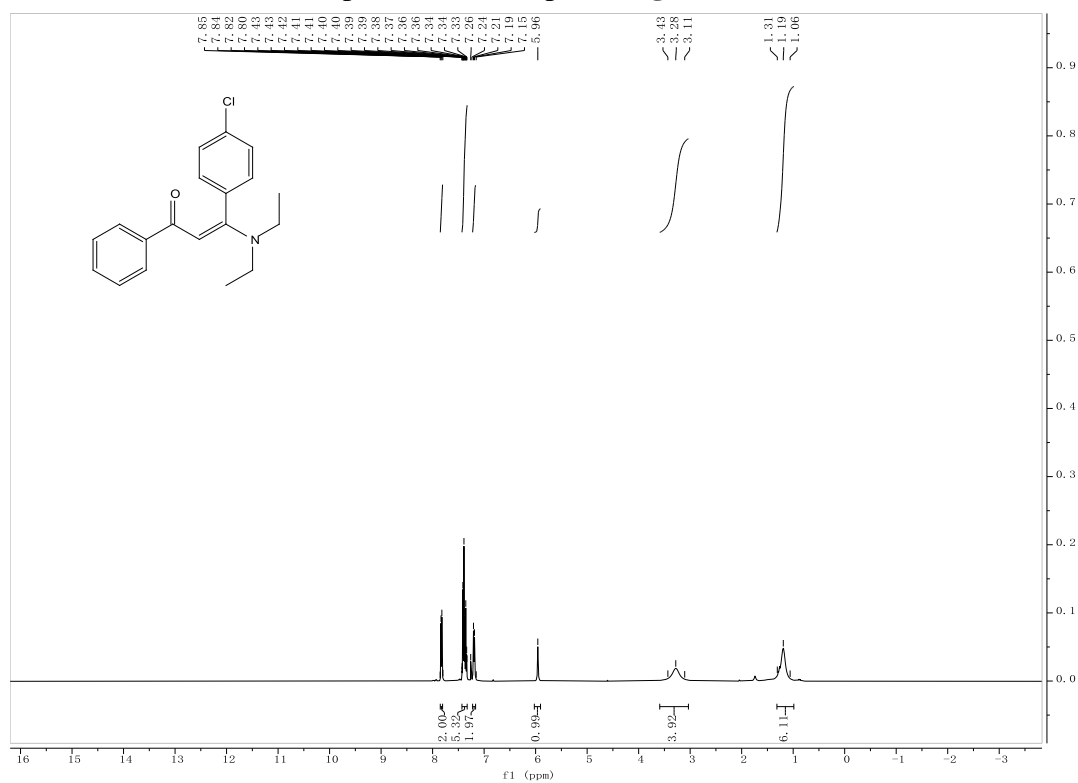

<sup>13</sup>C NMR spectrum of compound **3g** (101 MHz, CDCl<sub>3</sub>)

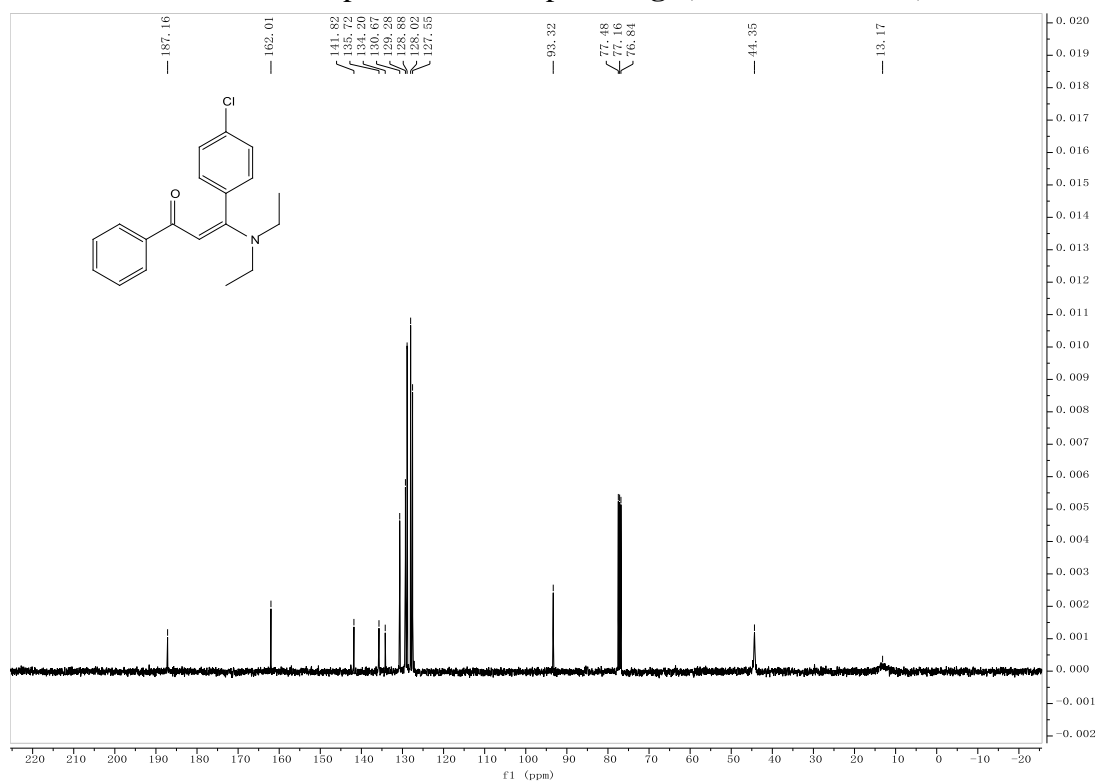

<sup>1</sup>H NMR spectrum of compound **3h** (400 MHz, CDCl<sub>3</sub>)

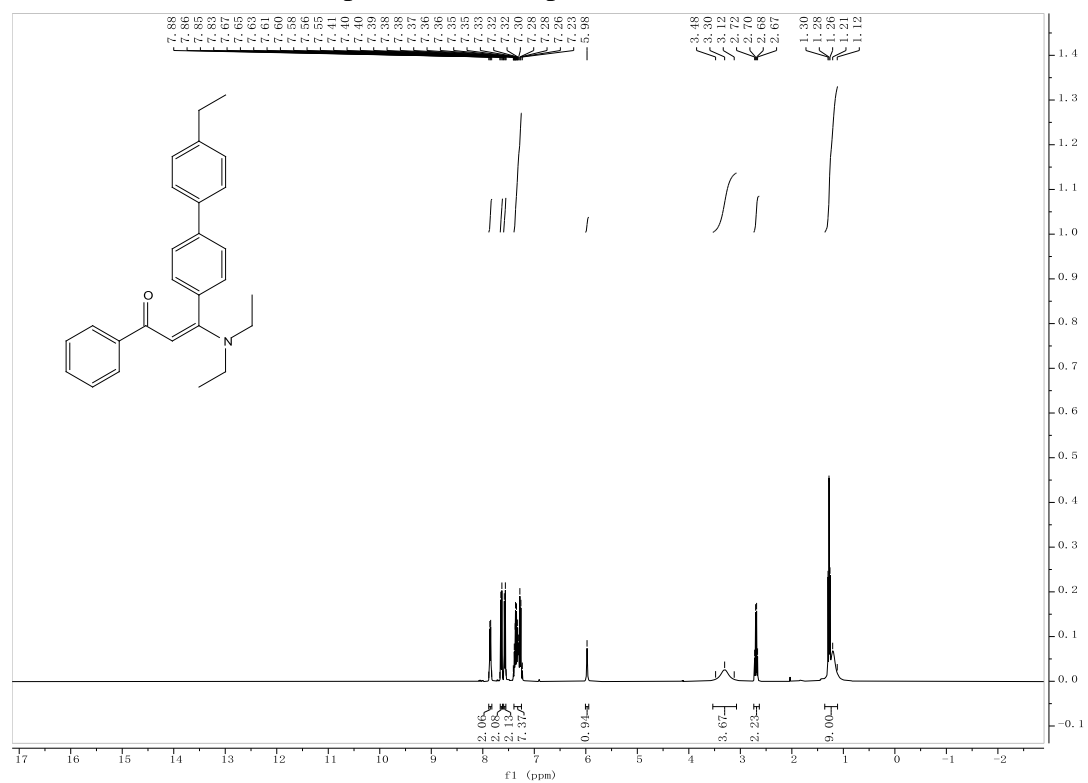

<sup>13</sup>C NMR spectrum of compound **3h** (101 MHz, CDCl<sub>3</sub>)

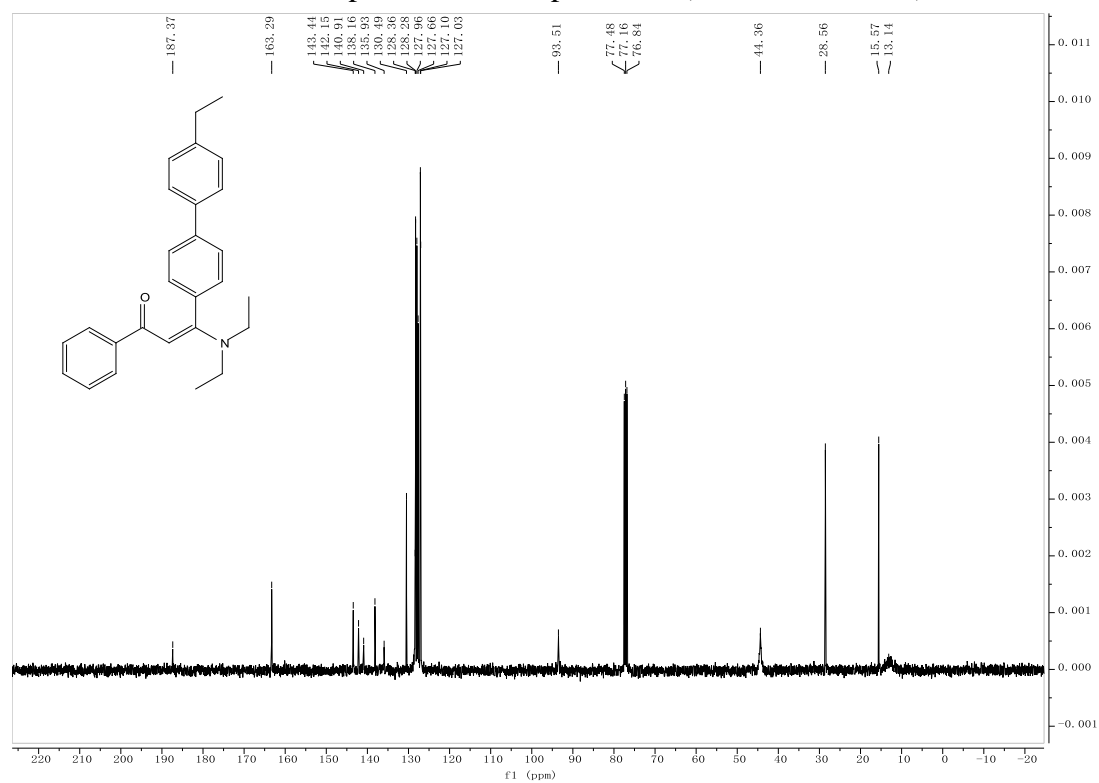

<sup>1</sup>H NMR spectrum of compound **3i** (400 MHz, CDCl<sub>3</sub>)

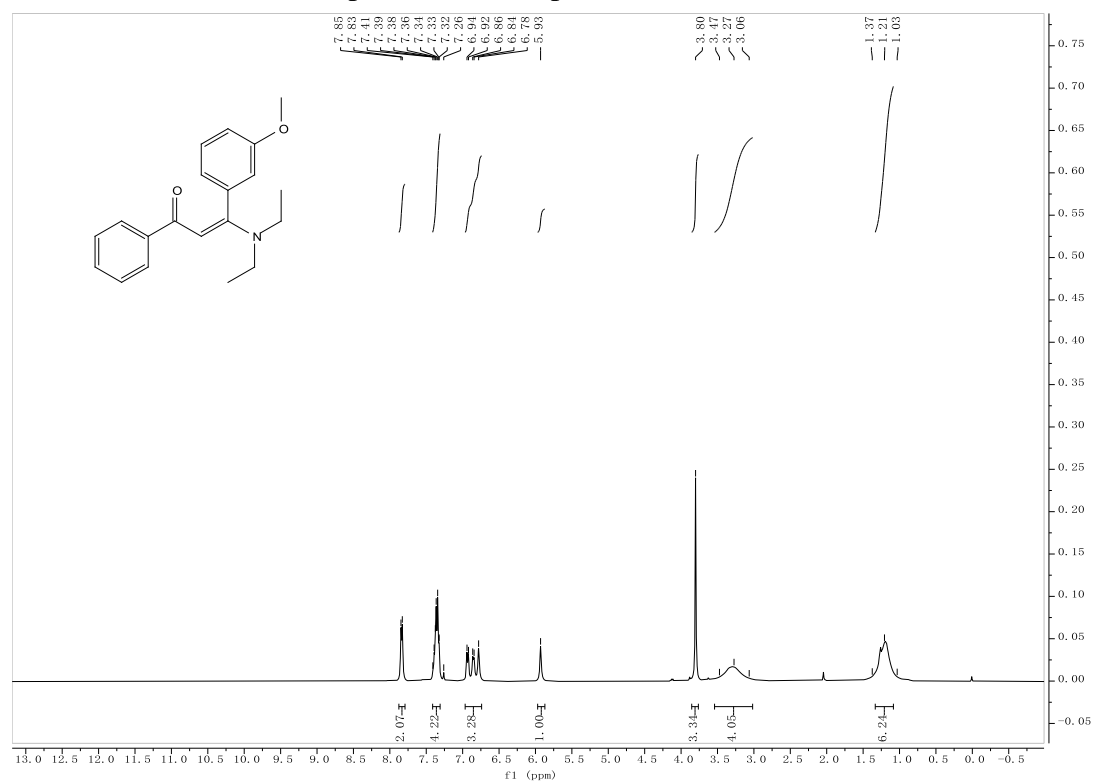

<sup>13</sup>C NMR spectrum of compound **3i** (101 MHz, CDCl<sub>3</sub>)

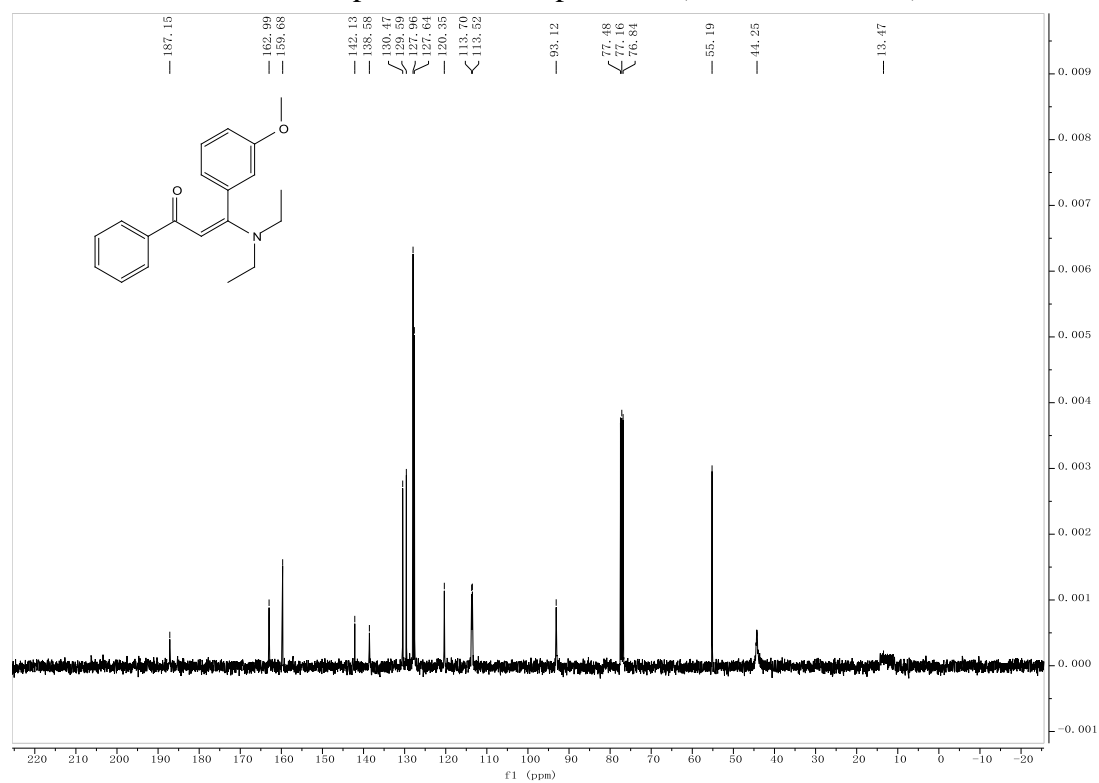

<sup>1</sup>H NMR spectrum of compound **3j** (400 MHz, Acetone-*d*<sub>6</sub>)

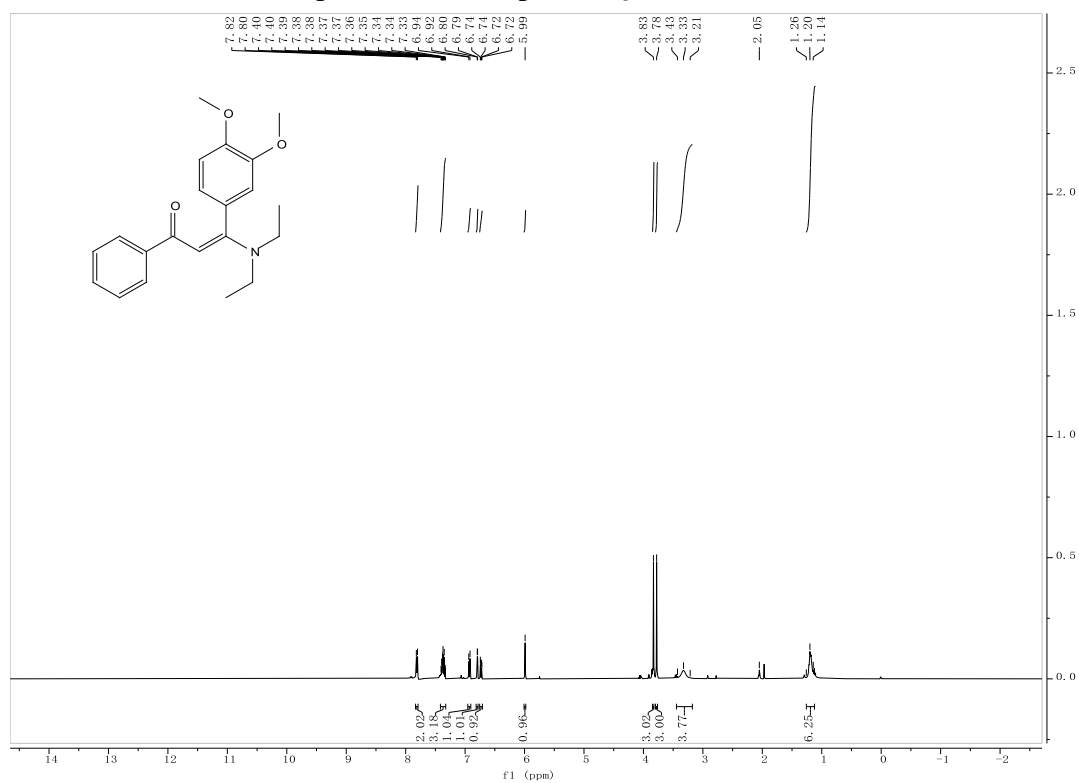

<sup>13</sup>C NMR spectrum of compound **3j** (101 MHz, Acetone-*d*<sub>6</sub>)

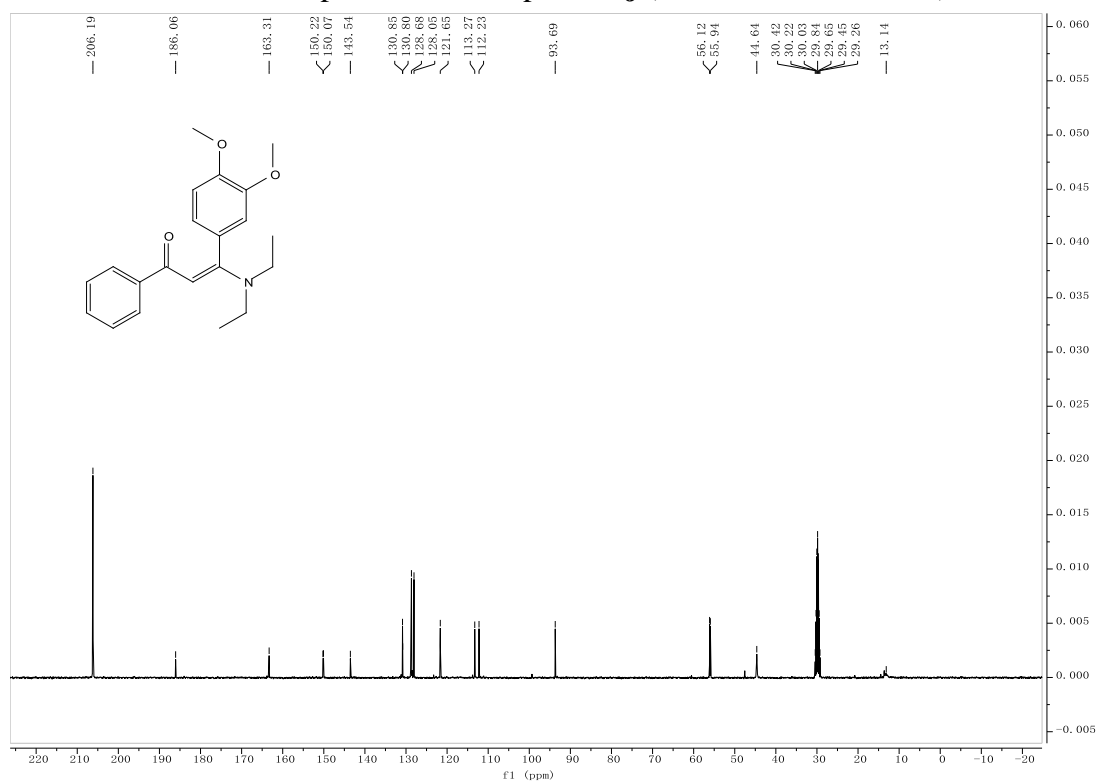

<sup>1</sup>H NMR spectrum of compound **3k** (400 MHz, CDCl<sub>3</sub>)

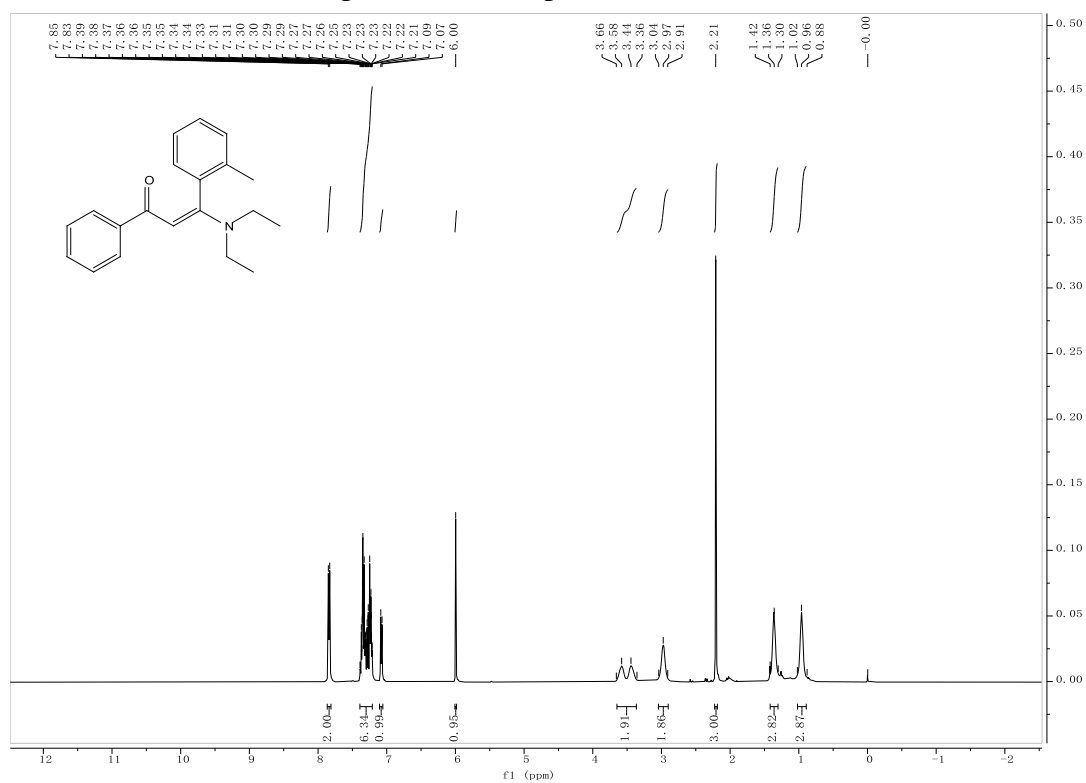

<sup>13</sup>C NMR spectrum of compound **3k** (101 MHz, CDCl<sub>3</sub>)

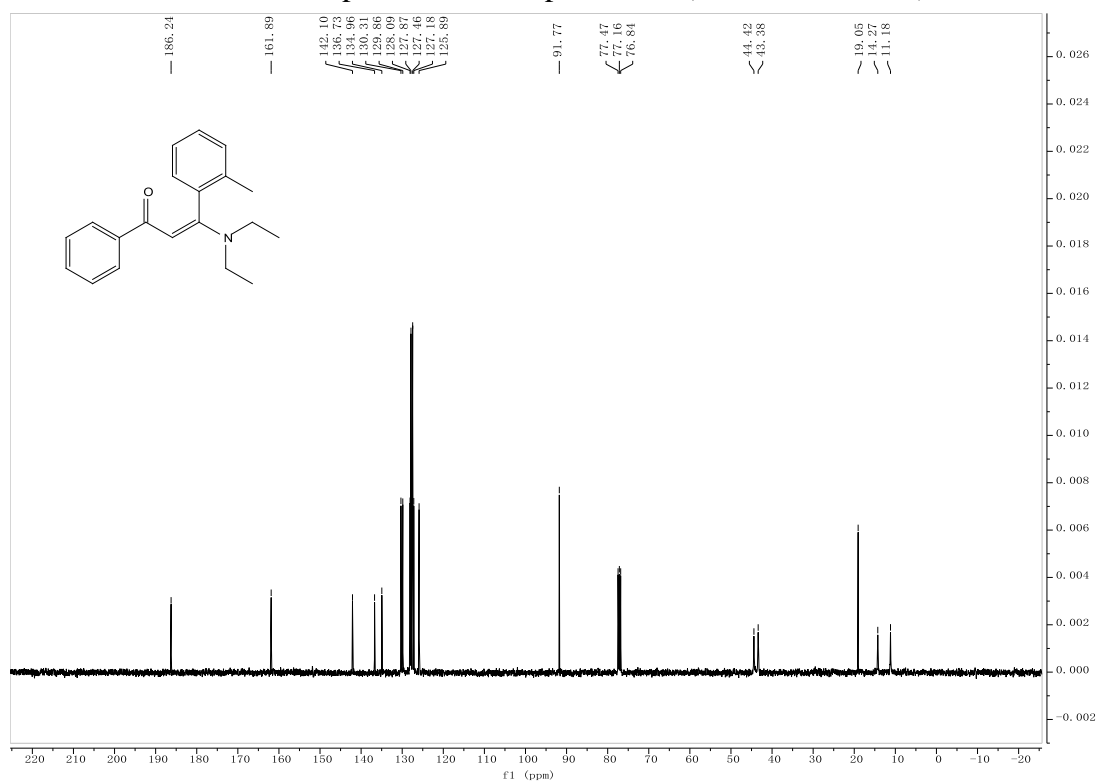

<sup>1</sup>H NMR spectrum of compound **31** (400 MHz, DMSO-*d*<sub>6</sub>)

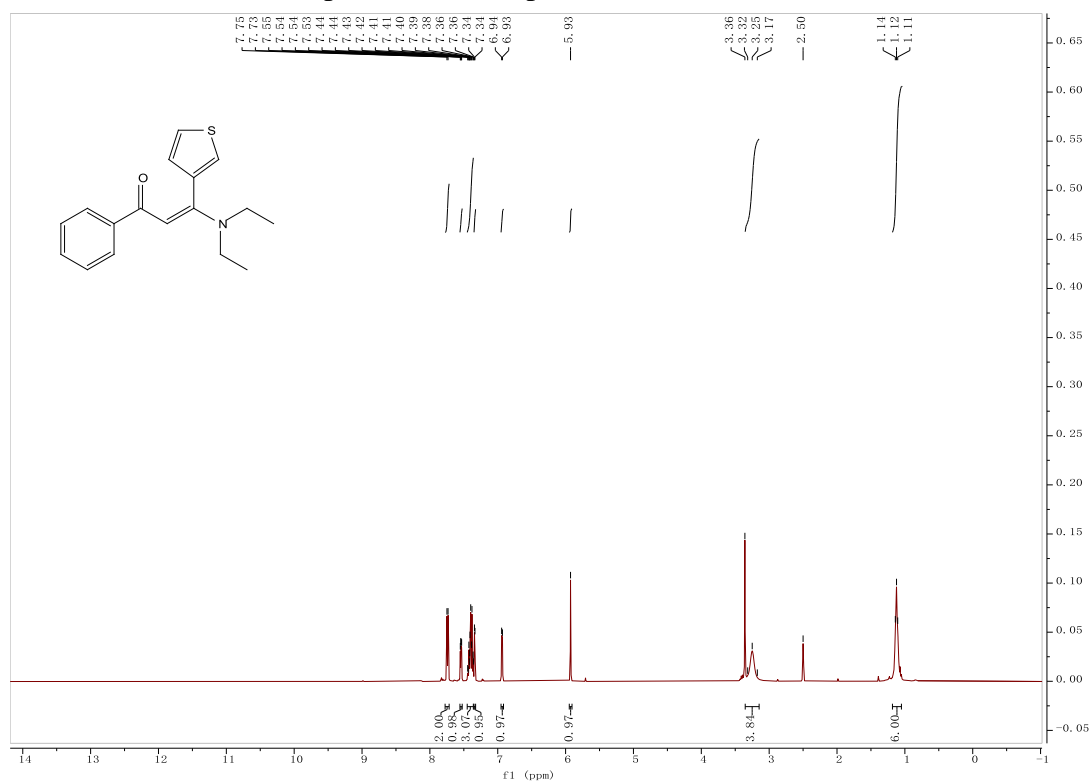

<sup>13</sup>C NMR spectrum of compound **31** (101 MHz, DMSO-*d*<sub>6</sub>)

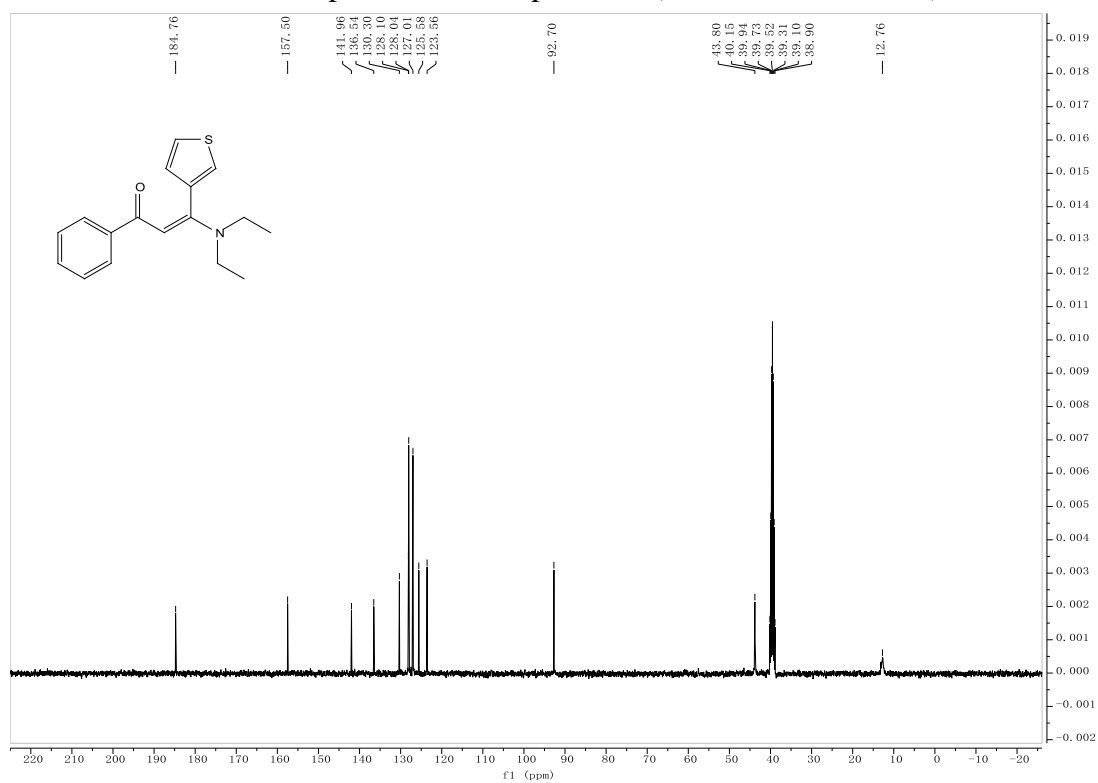

<sup>1</sup>H NMR spectrum of compound **3m** (400 MHz, DMSO-*d*<sub>6</sub>)

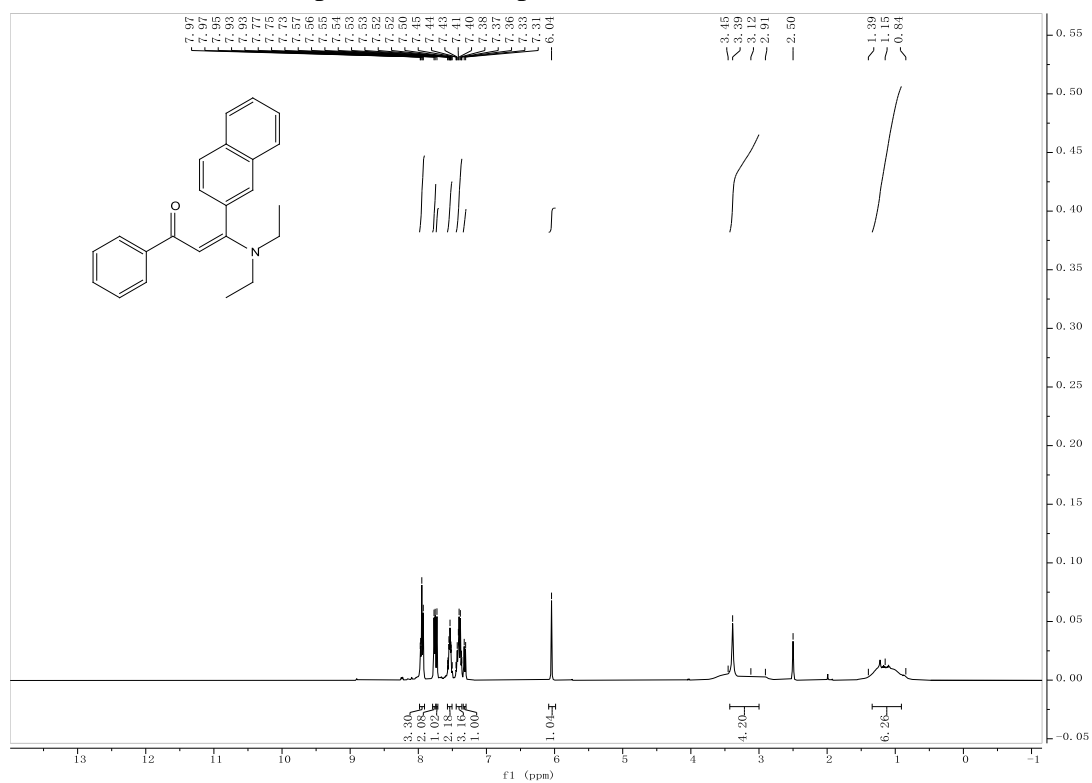

<sup>13</sup>C NMR spectrum of compound **3m** (101 MHz, DMSO-*d*<sub>6</sub>)

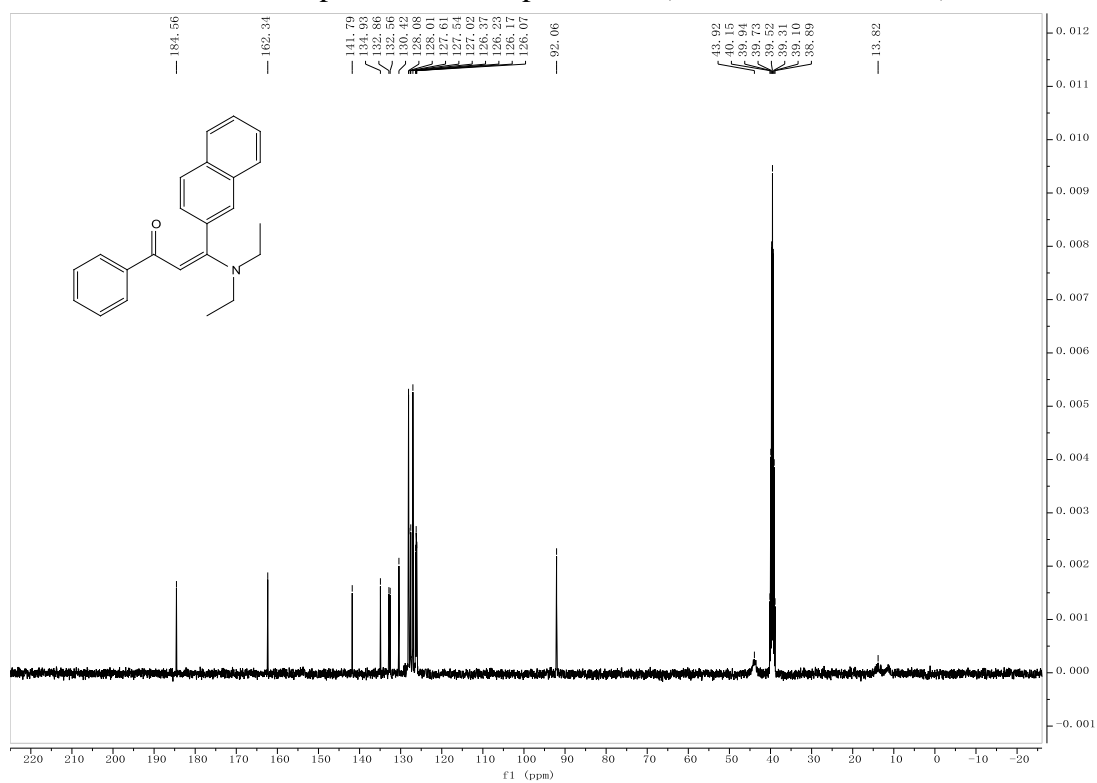

<sup>1</sup>H NMR spectrum of compound **3n** (400 MHz, DMSO-*d*<sub>6</sub>)

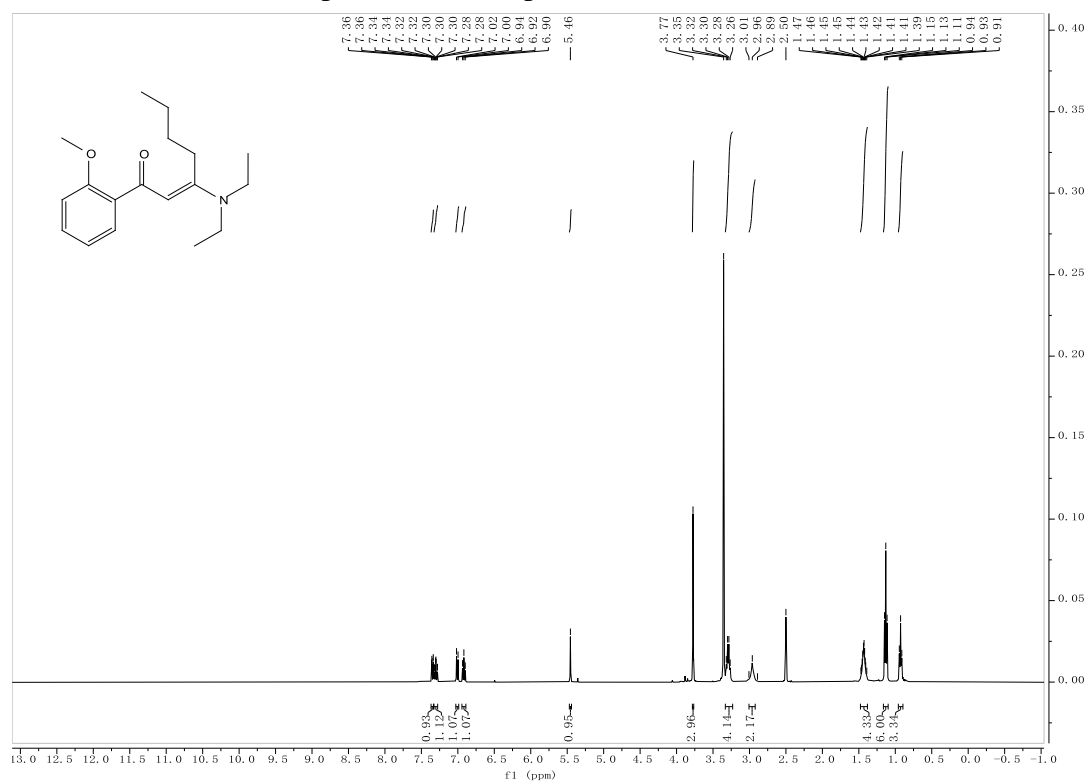

<sup>13</sup>C NMR spectrum of compound **3n** (101 MHz, DMSO-*d*<sub>6</sub>)

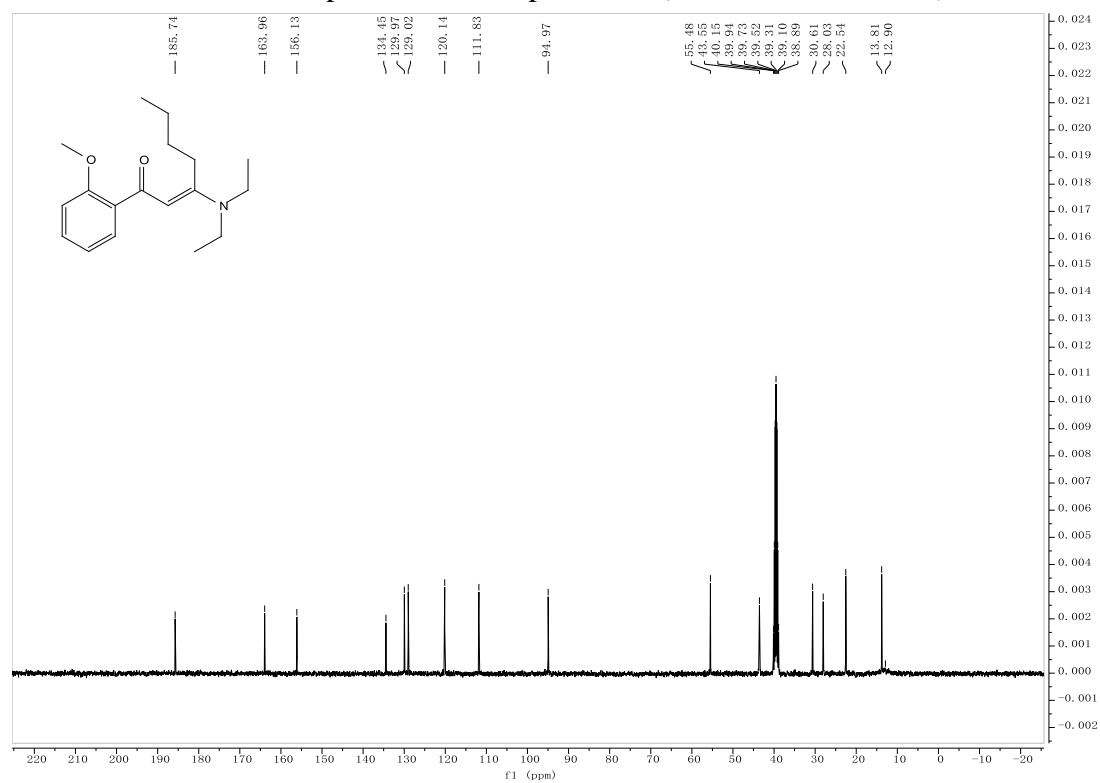

<sup>1</sup>H NMR spectrum of compound **3o** (400 MHz, DMSO-*d*<sub>6</sub>)

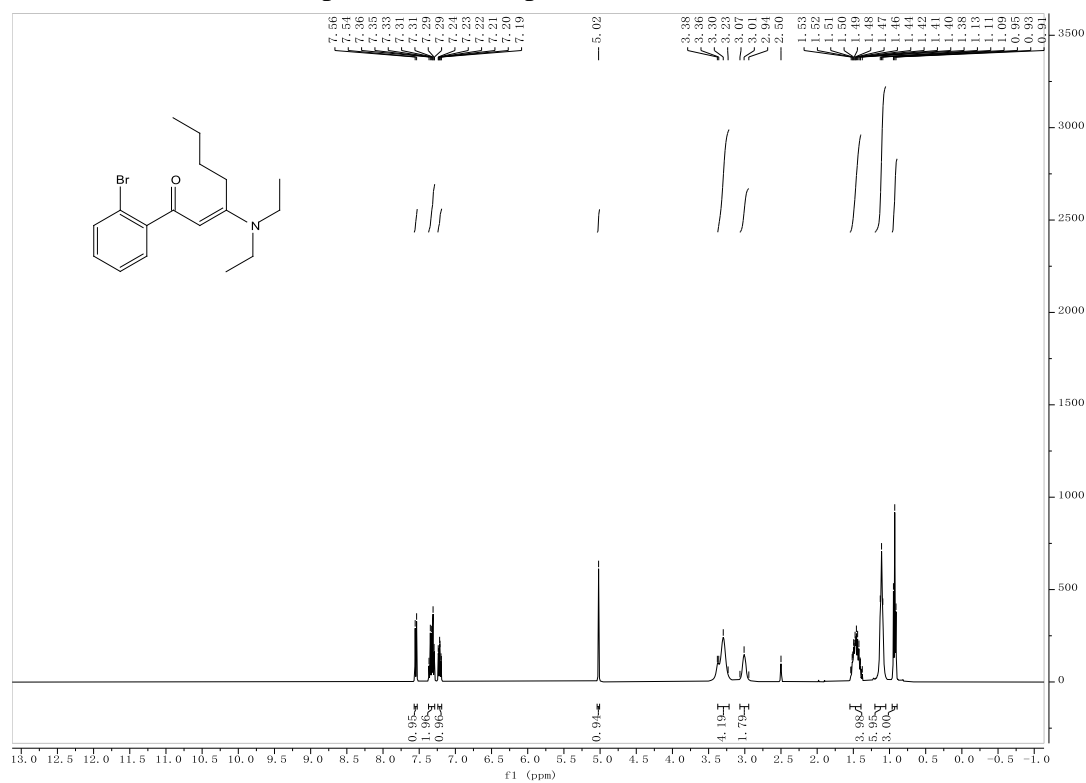

<sup>13</sup>C NMR spectrum of compound **3o** (101 MHz, DMSO-*d*<sub>6</sub>)

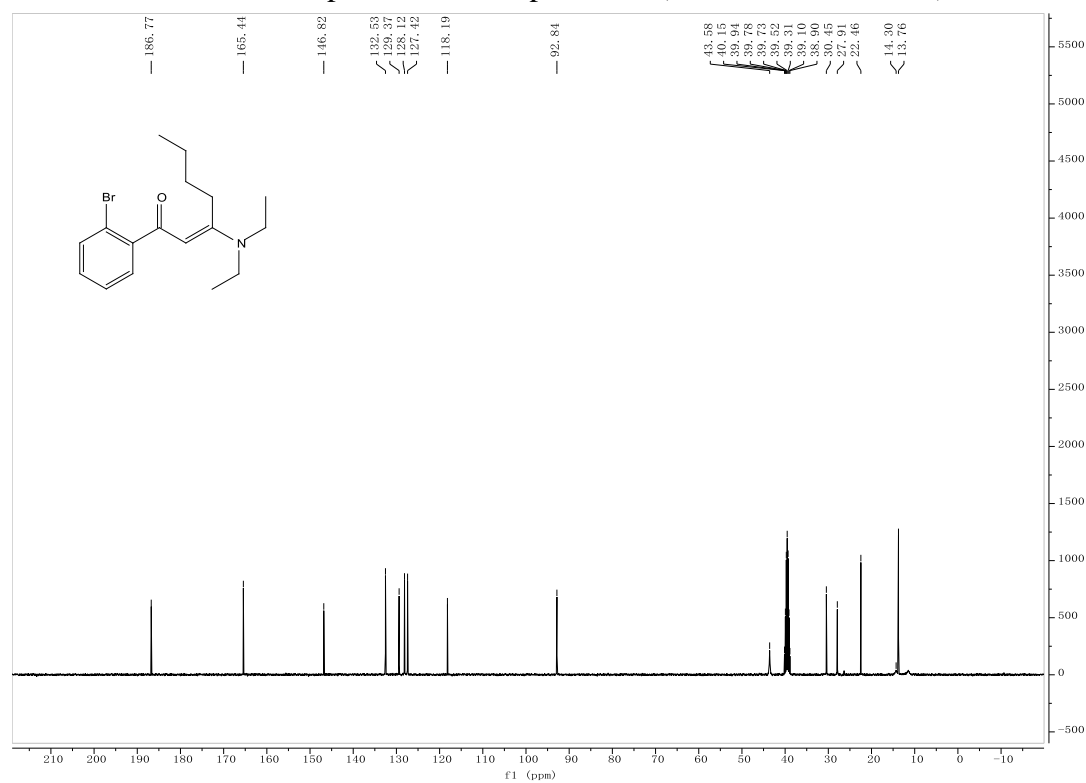

<sup>1</sup>H NMR spectrum of compound **3p** (400 MHz, DMSO-*d*<sub>6</sub>)

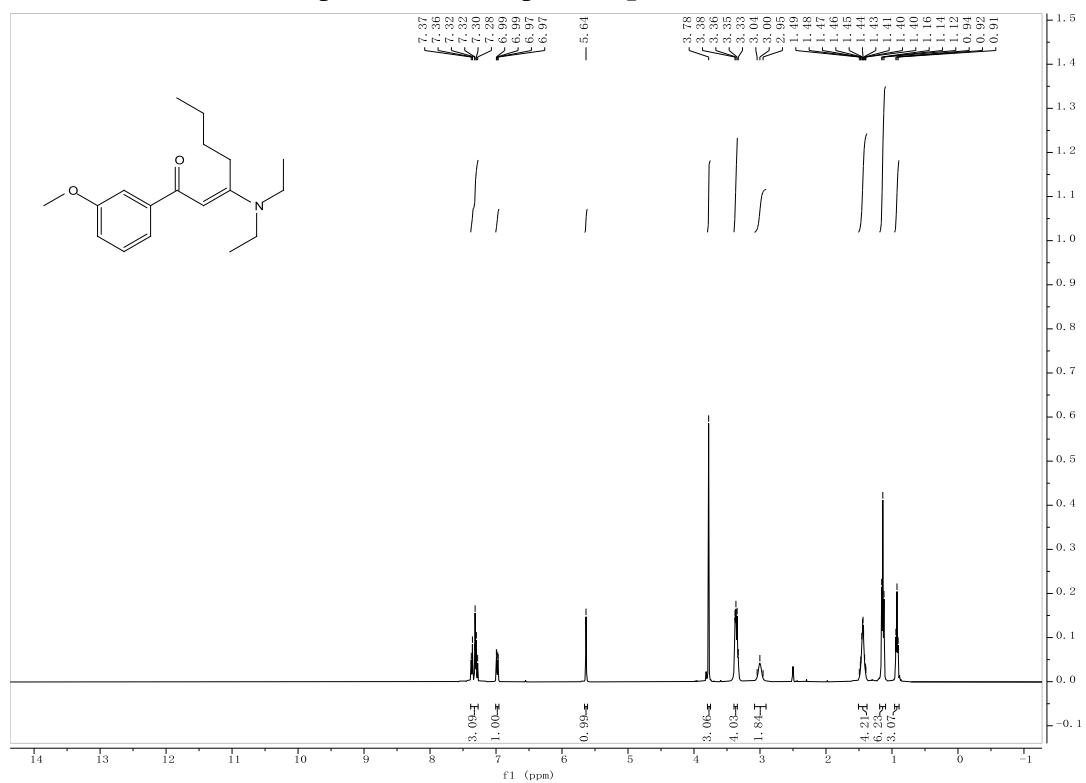

<sup>13</sup>C NMR spectrum of compound **3p** (101 MHz, DMSO-*d*<sub>6</sub>)

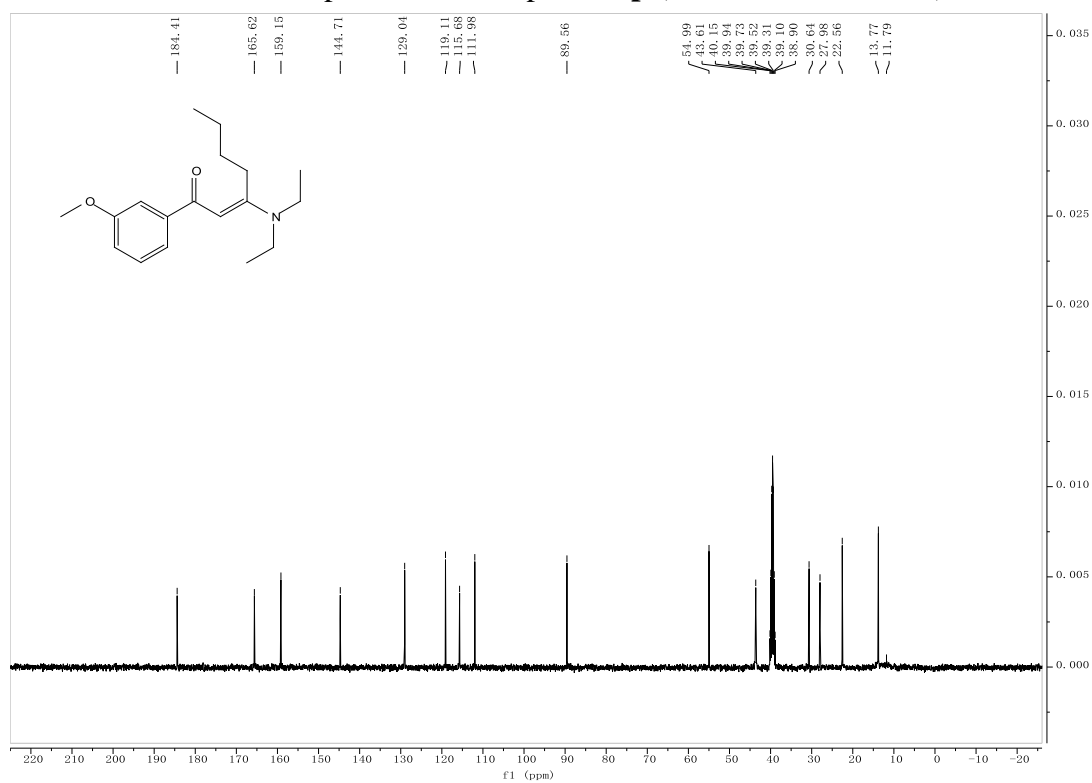

<sup>1</sup>H NMR spectrum of compound **3q** (400 MHz, DMSO-*d*<sub>6</sub>)

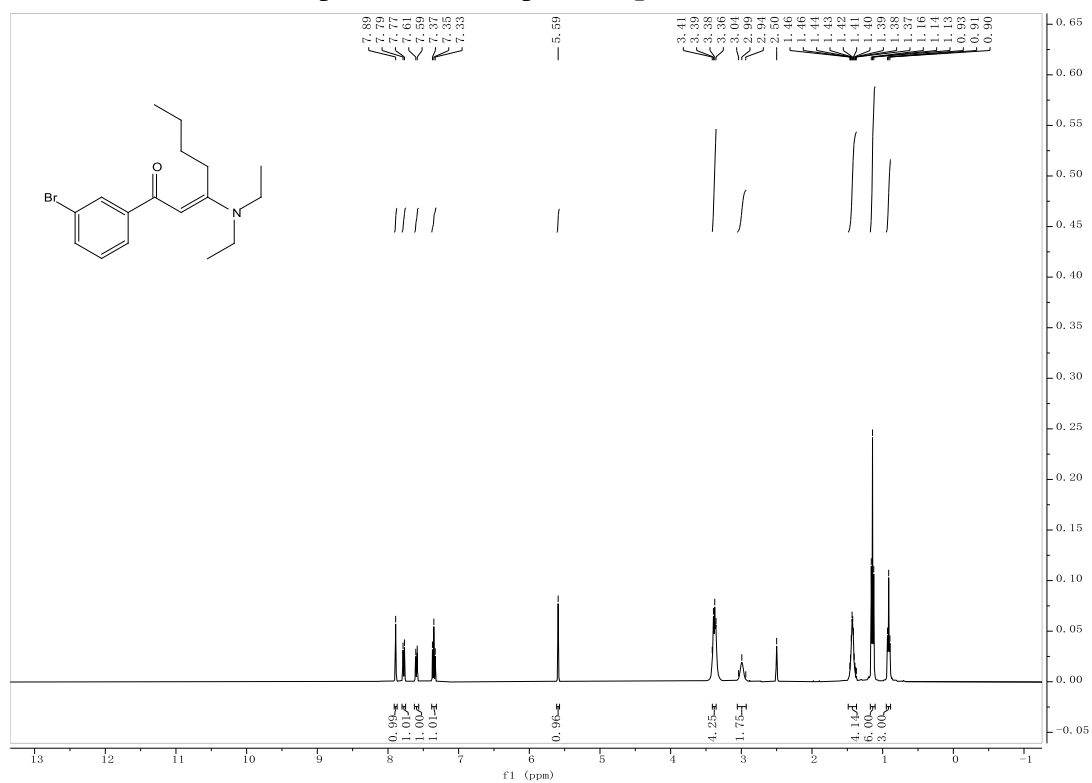

<sup>13</sup>C NMR spectrum of compound **3q** (101 MHz, DMSO-*d*<sub>6</sub>)

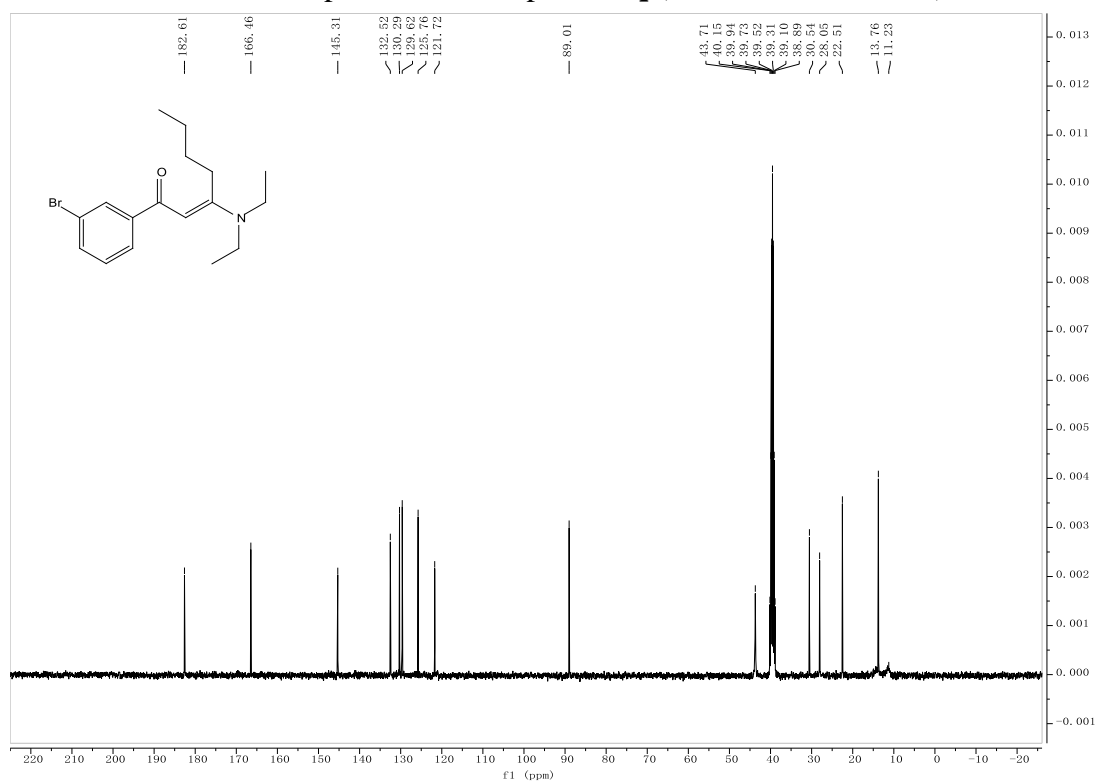

<sup>1</sup>H NMR spectrum of compound **3r** (400 MHz, DMSO-*d*<sub>6</sub>)

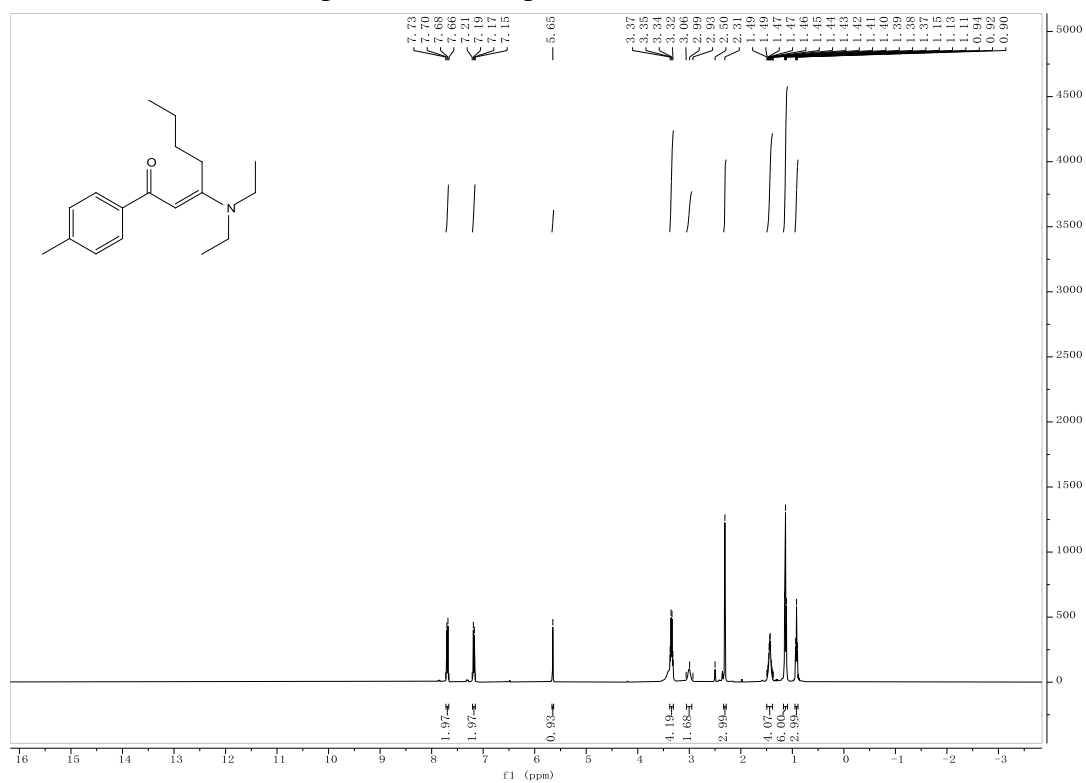

<sup>13</sup>C NMR spectrum of compound **3r** (101 MHz, DMSO-*d*<sub>6</sub>)

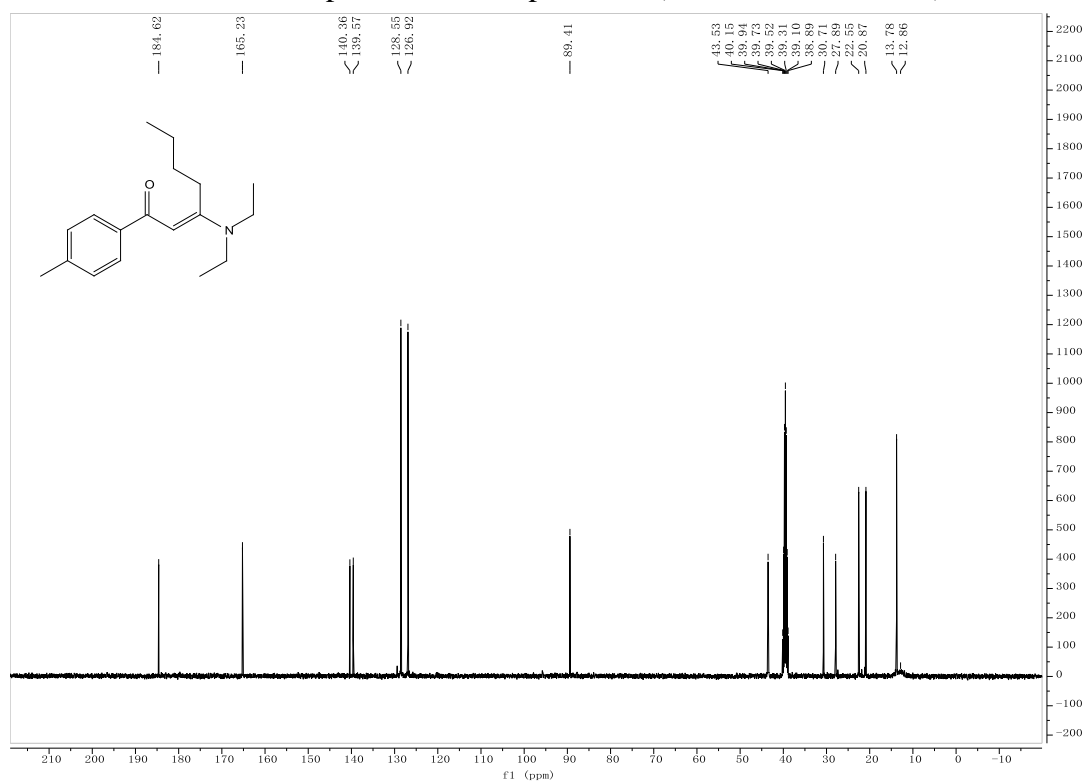



<sup>1</sup>H NMR spectrum of compound **3t** (400 MHz, CDCl<sub>3</sub>)

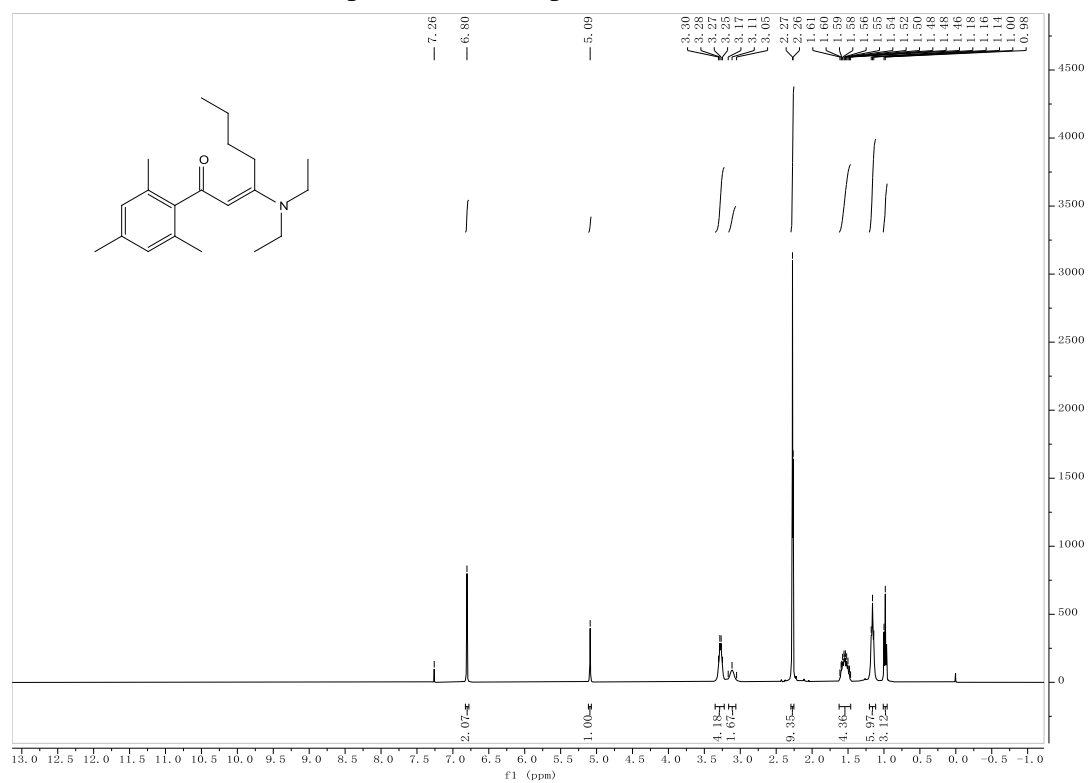

<sup>13</sup>C NMR spectrum of compound **3t** (101 MHz, CDCl<sub>3</sub>)

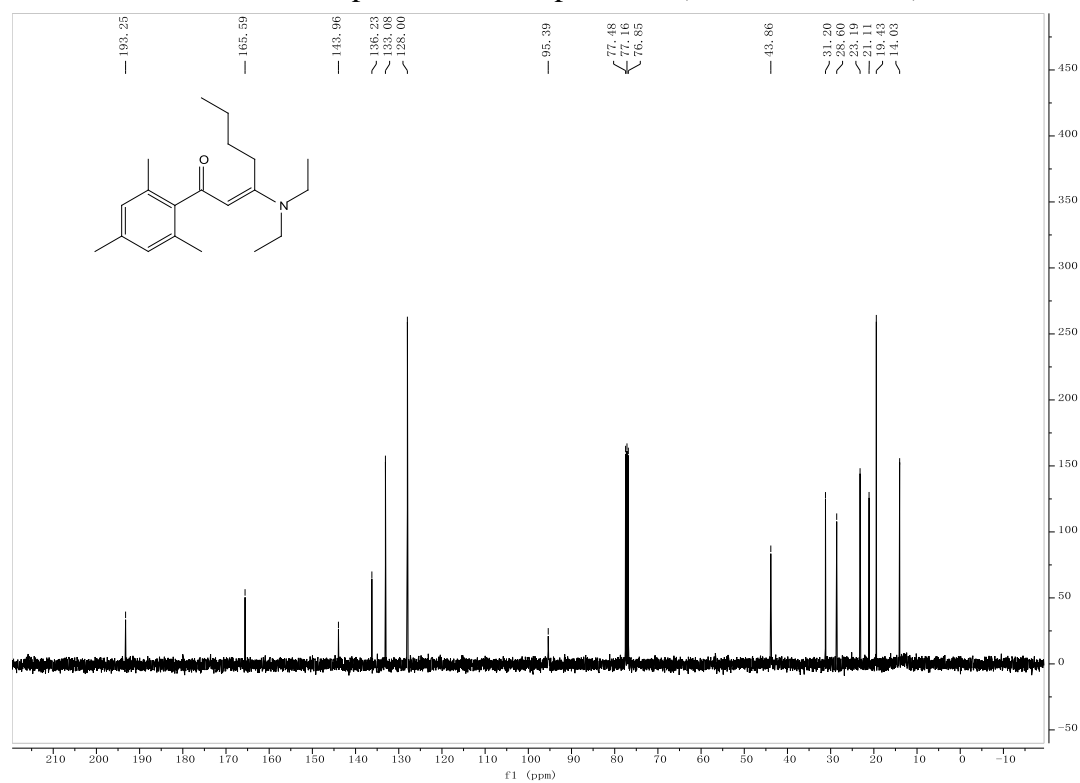

<sup>1</sup>H NMR spectrum of compound **3u** (400 MHz, CDCl<sub>3</sub>)

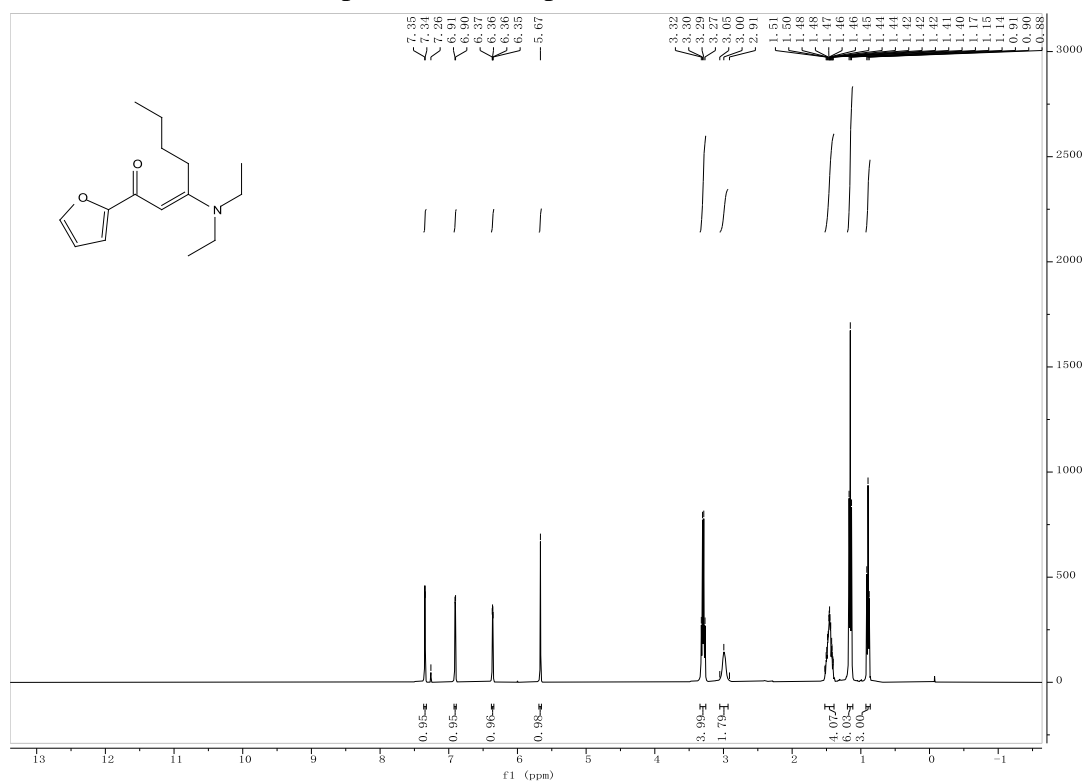

<sup>13</sup>C NMR spectrum of compound **3u** (101 MHz, CDCl<sub>3</sub>)

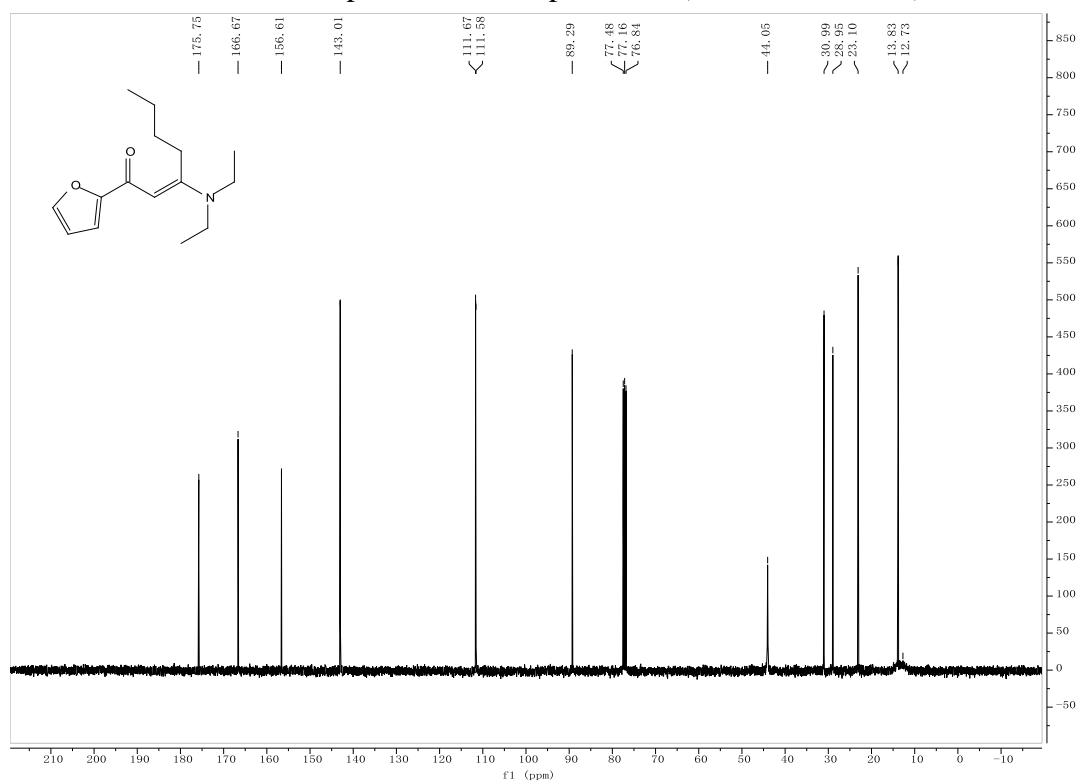



$^1\text{H}$  NMR spectrum of compound **3w** (400 MHz,  $\text{CDCl}_3$ )

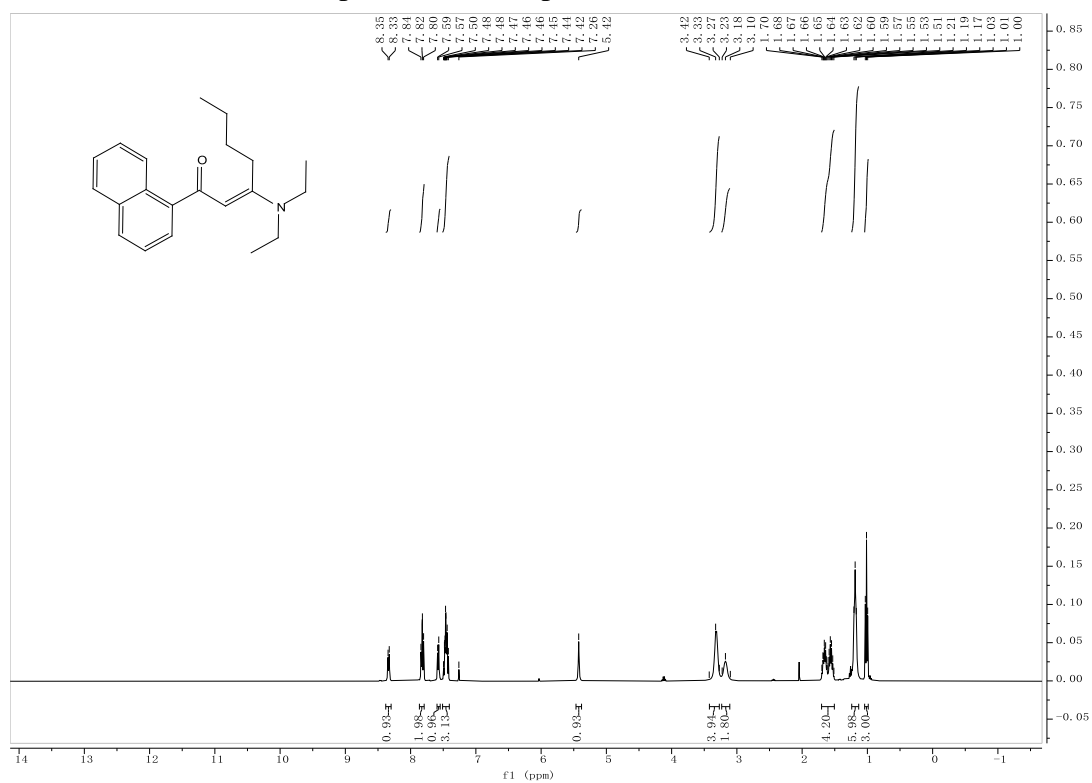

$^{13}\text{C}$  NMR spectrum of compound **3w** (101 MHz,  $\text{CDCl}_3$ )

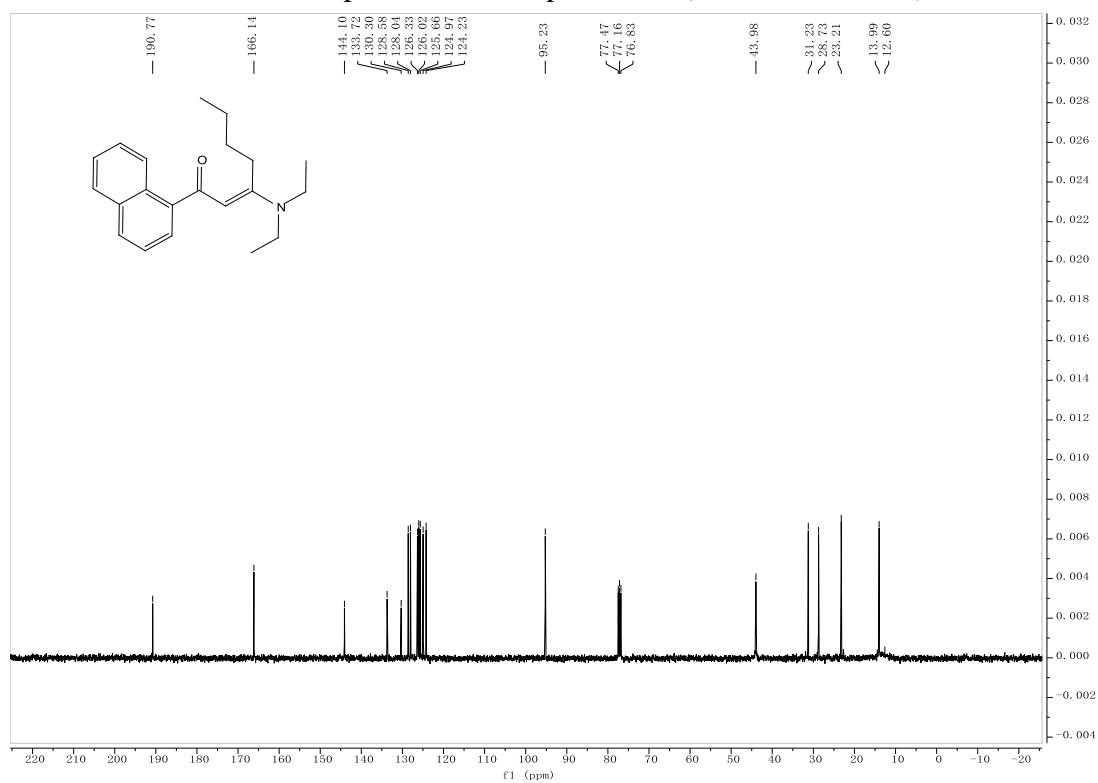

<sup>1</sup>H NMR spectrum of compound **3x** (400 MHz, CDCl<sub>3</sub>)

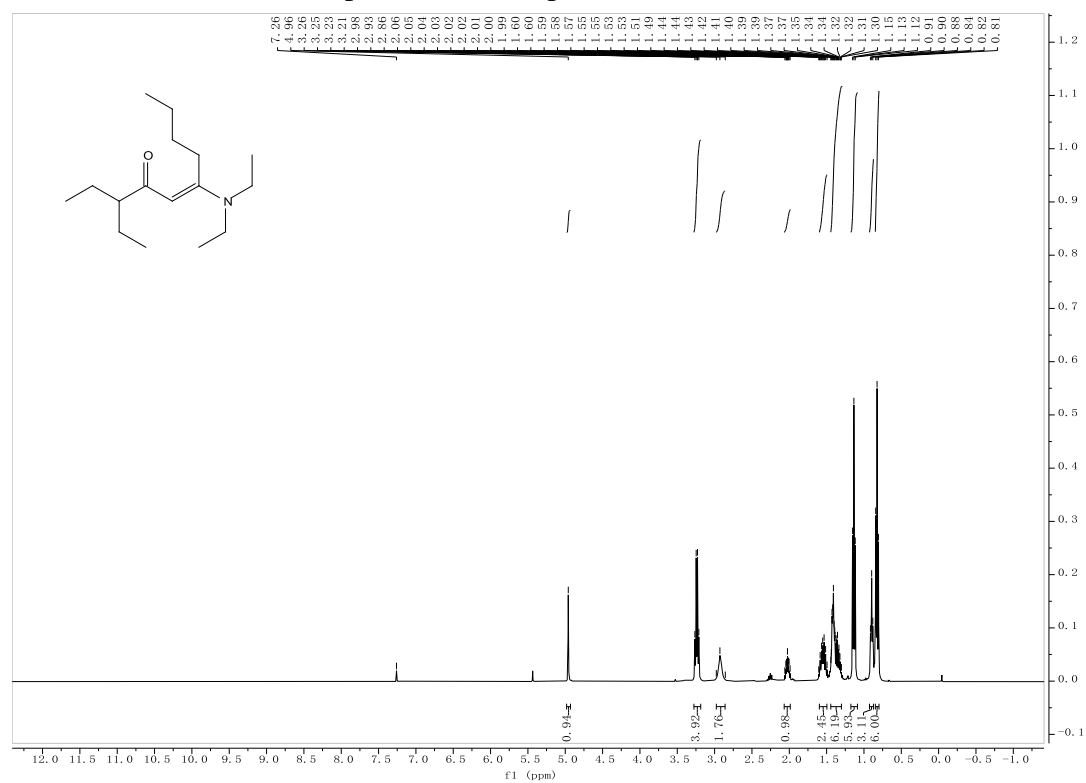

<sup>13</sup>C NMR spectrum of compound **3x** (101 MHz, CDCl<sub>3</sub>)

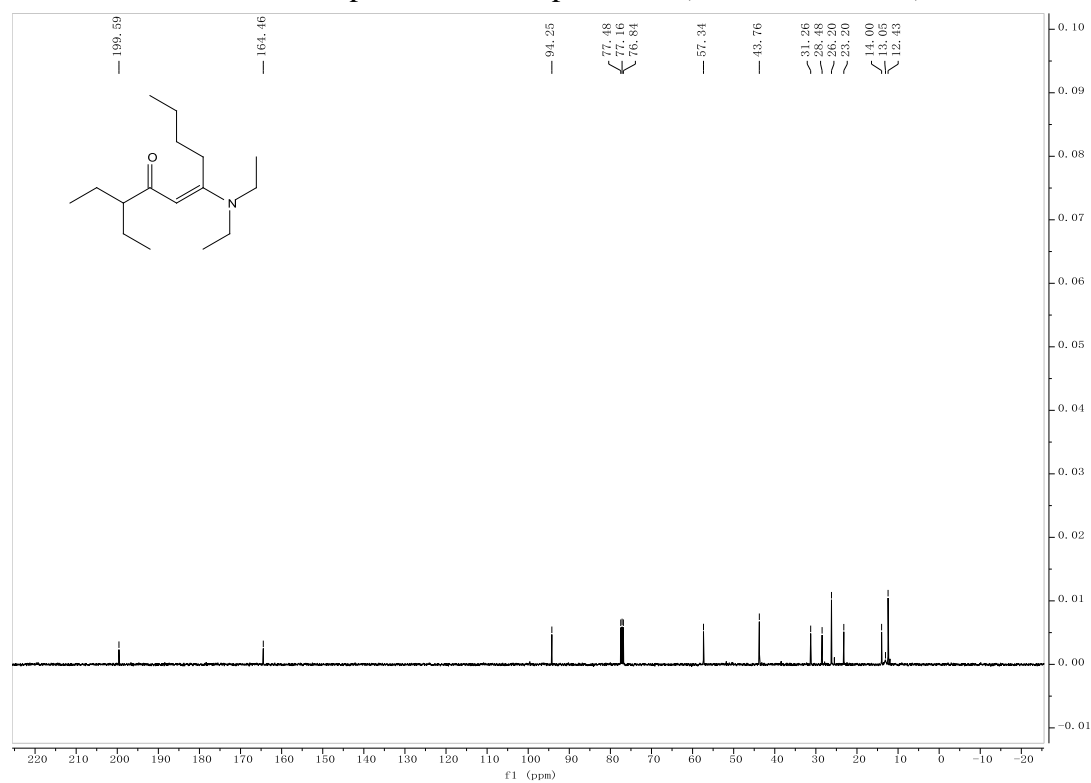

<sup>1</sup>H NMR spectrum of compound **3y** (400 MHz, CDCl<sub>3</sub>)

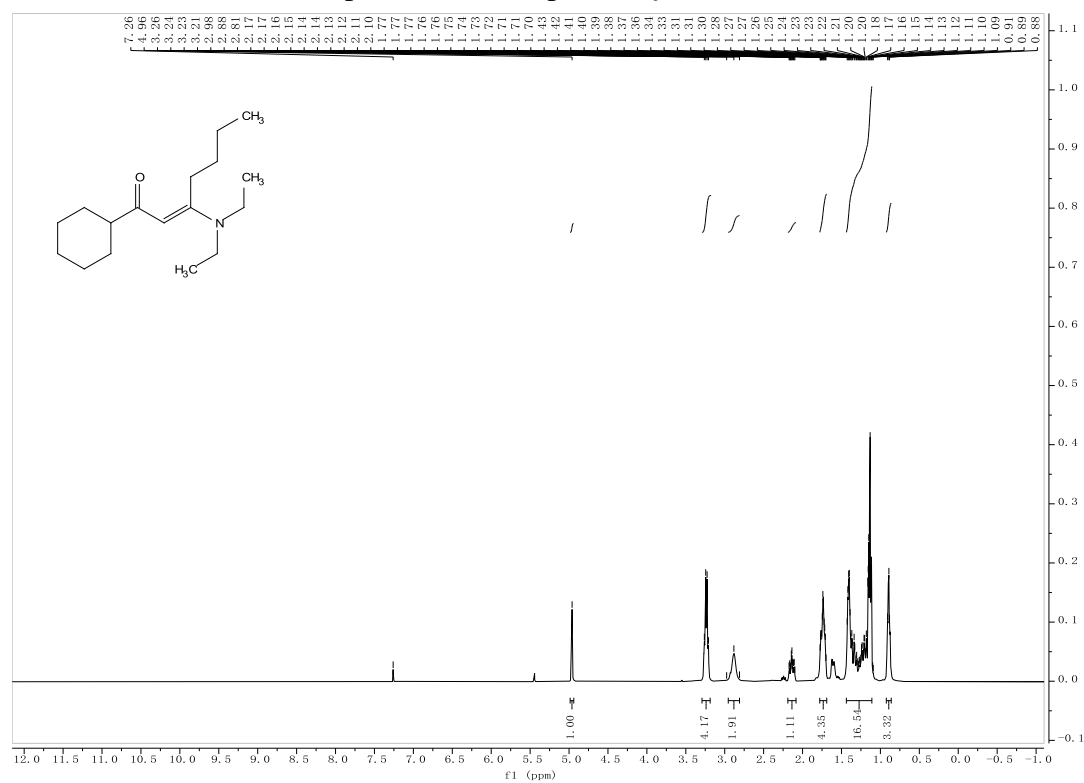

<sup>13</sup>C NMR spectrum of compound **3y** (101 MHz, CDCl<sub>3</sub>)

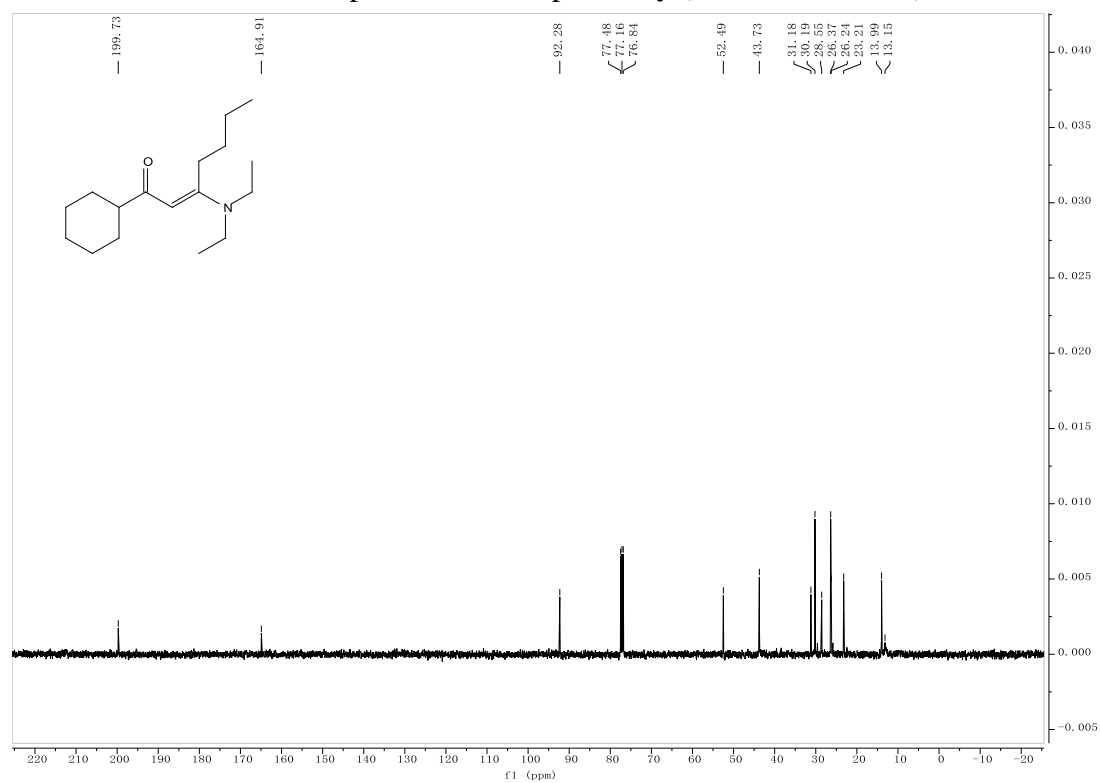

<sup>1</sup>H NMR spectrum of compound **3z** (400 MHz, CDCl<sub>3</sub>)

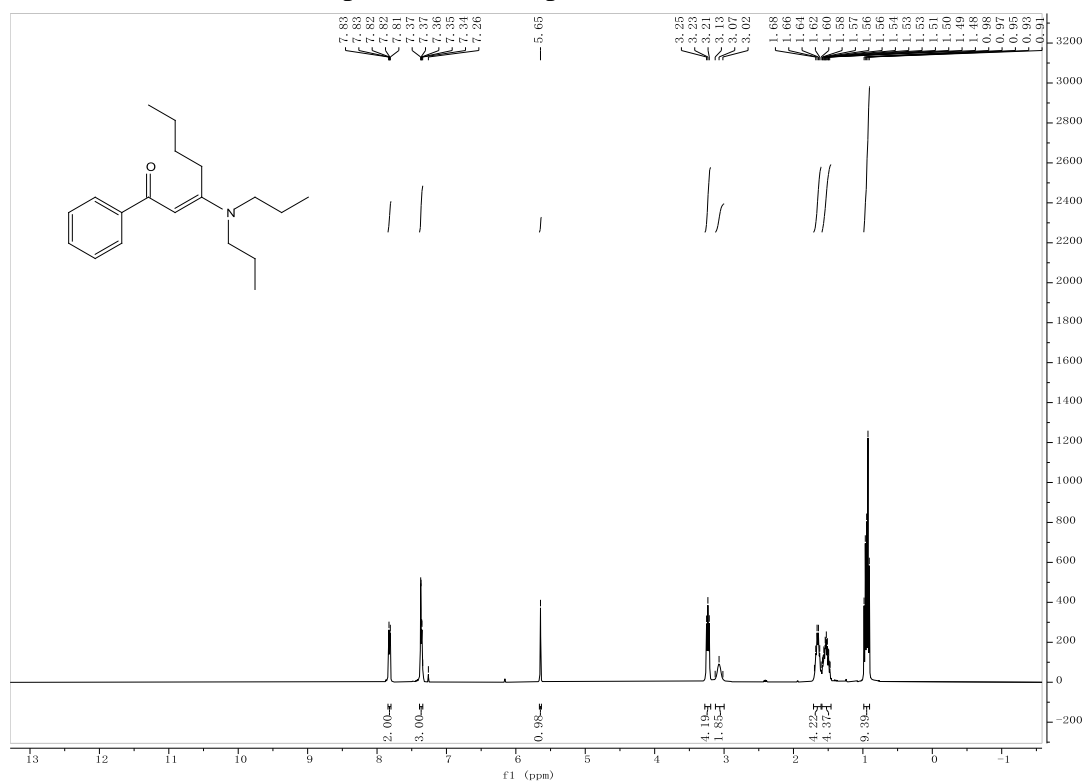

<sup>13</sup>C NMR spectrum of compound **3z** (101 MHz, CDCl<sub>3</sub>)

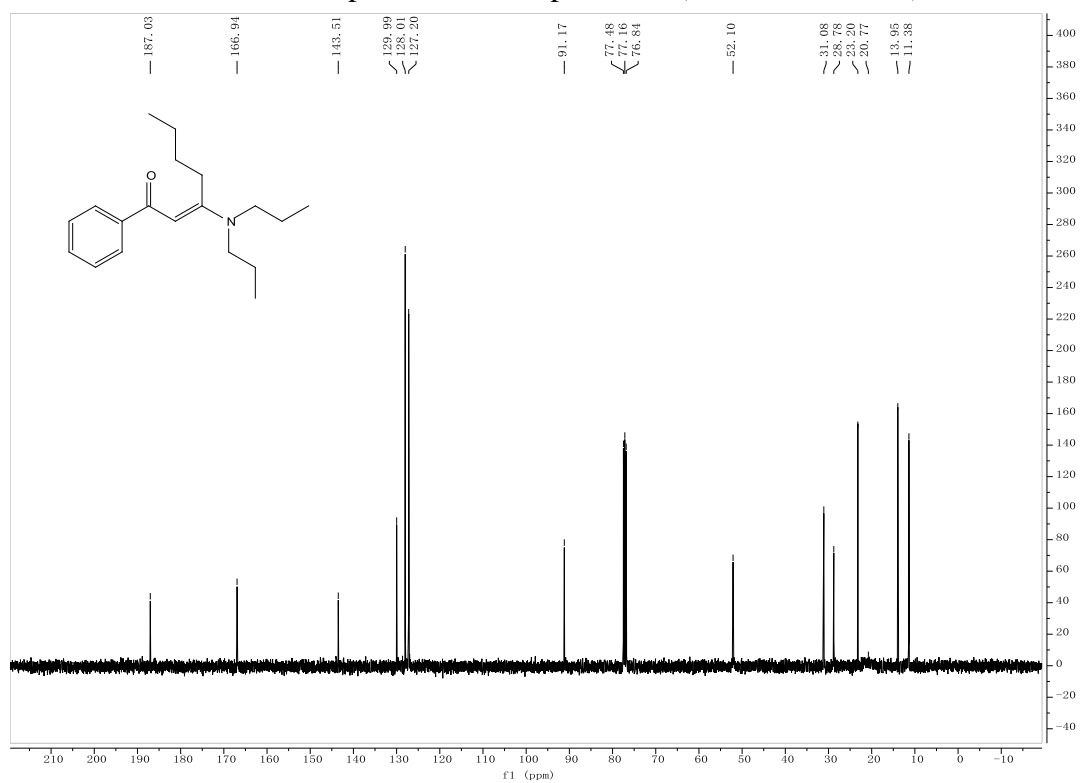

<sup>1</sup>H NMR spectrum of compound **3aa** (400 MHz, DMSO-*d*<sub>6</sub>)

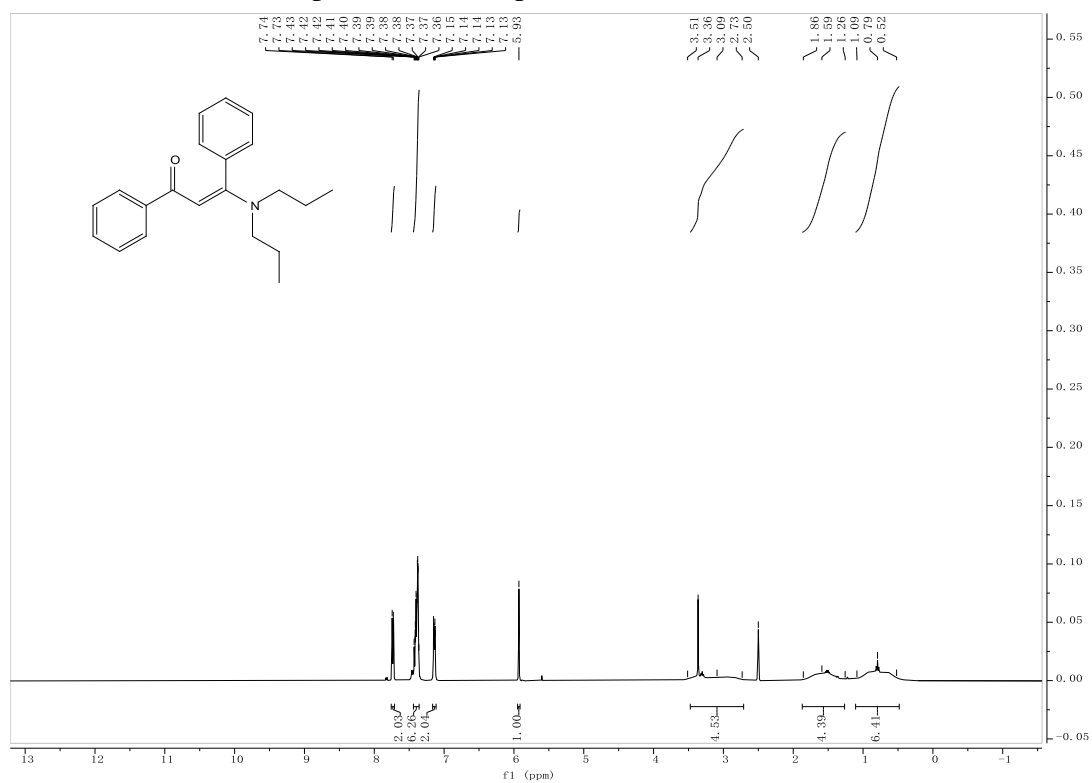

<sup>13</sup>C NMR spectrum of compound **3aa** (101 MHz, DMSO-*d*<sub>6</sub>)

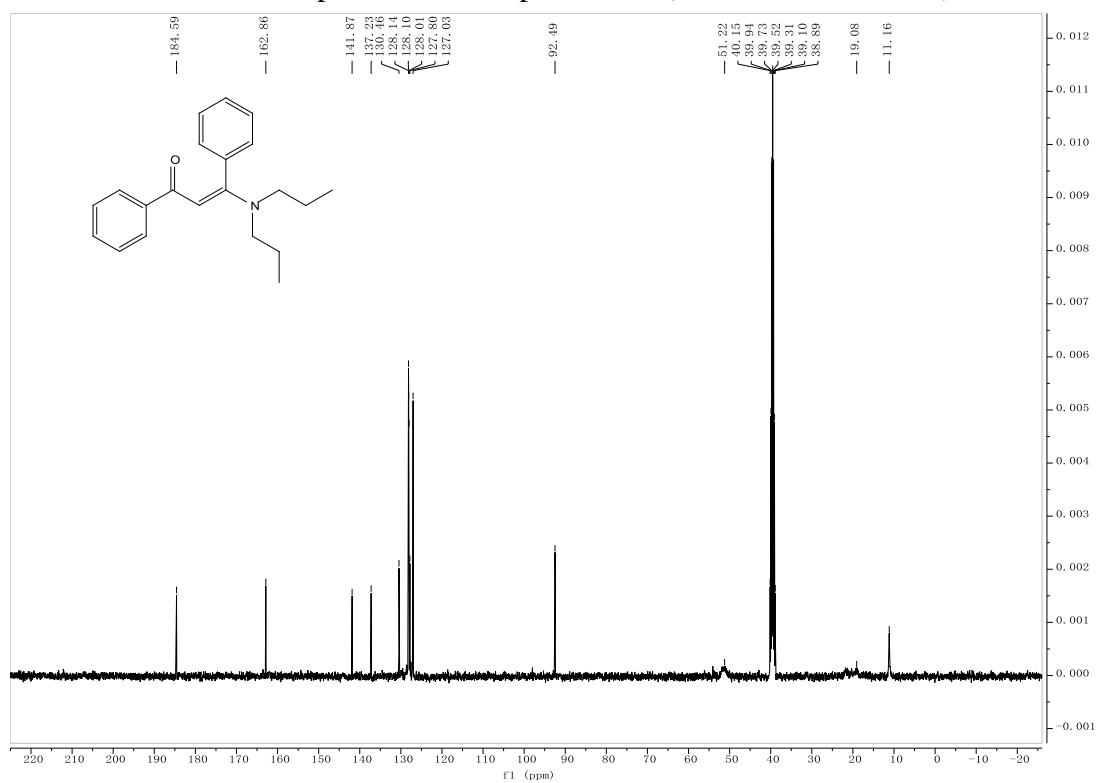

<sup>1</sup>H NMR spectrum of compound **3ab** (400 MHz, DMSO-*d*<sub>6</sub>)

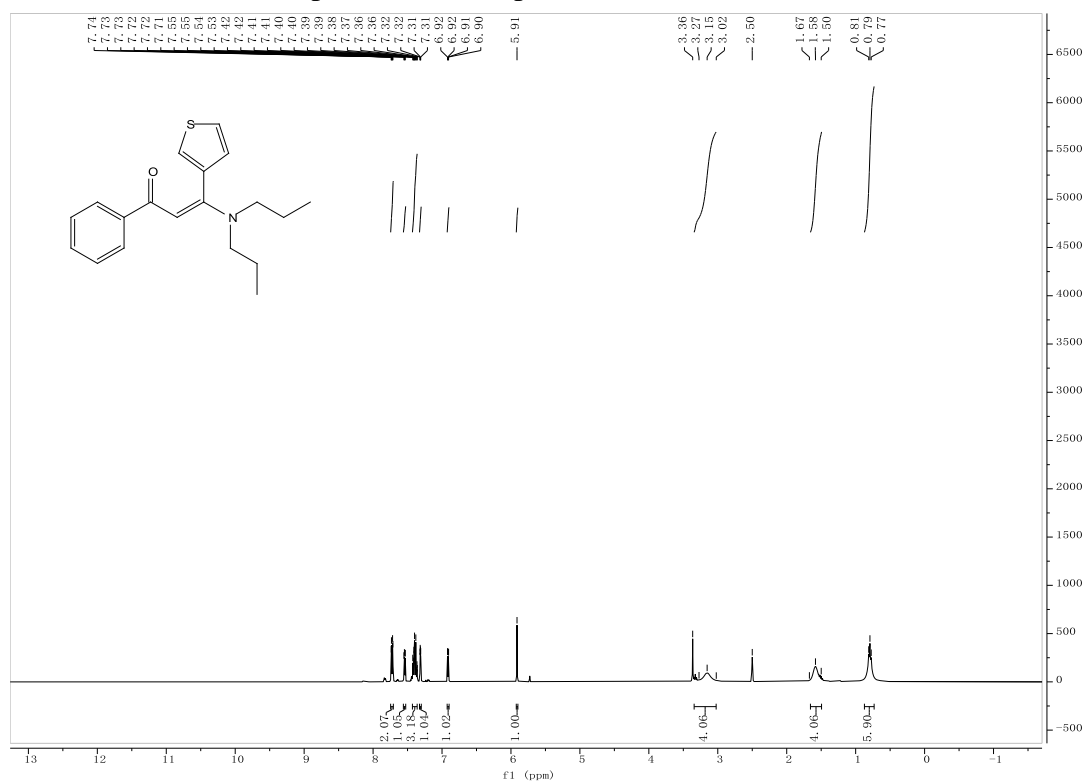

<sup>13</sup>C NMR spectrum of compound **3ab** (101 MHz, DMSO-*d*<sub>6</sub>)

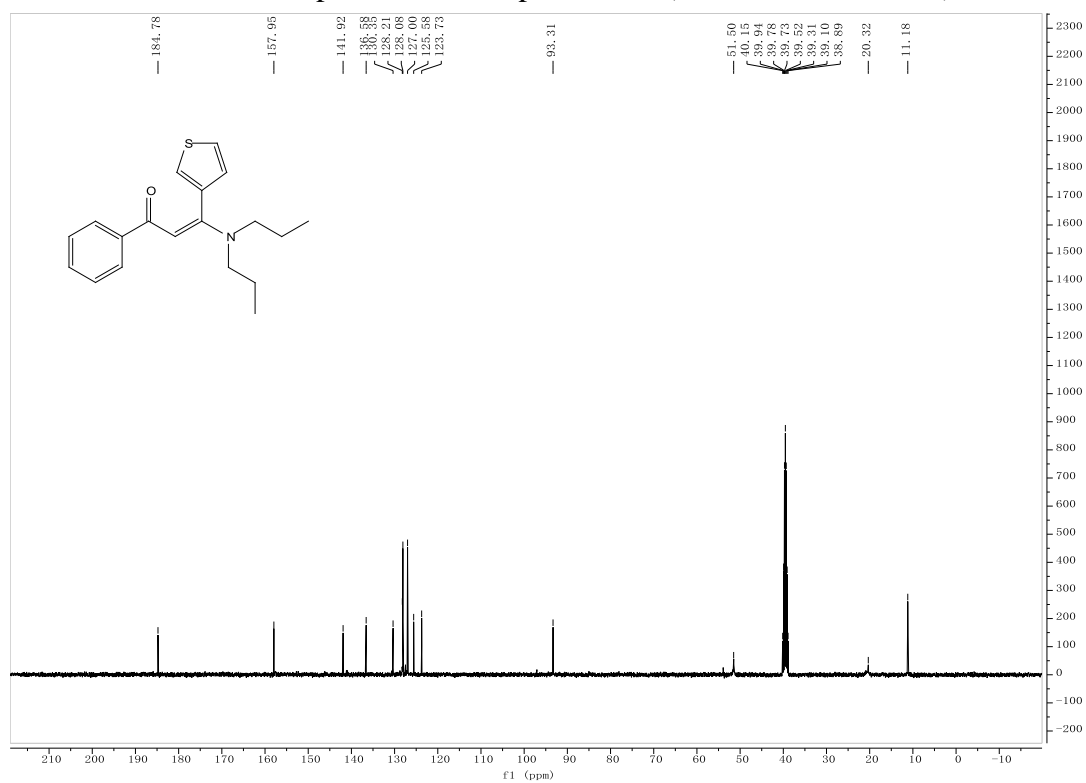

<sup>1</sup>H NMR spectrum of compound **3ac** (400 MHz, DMSO-*d*<sub>6</sub>)

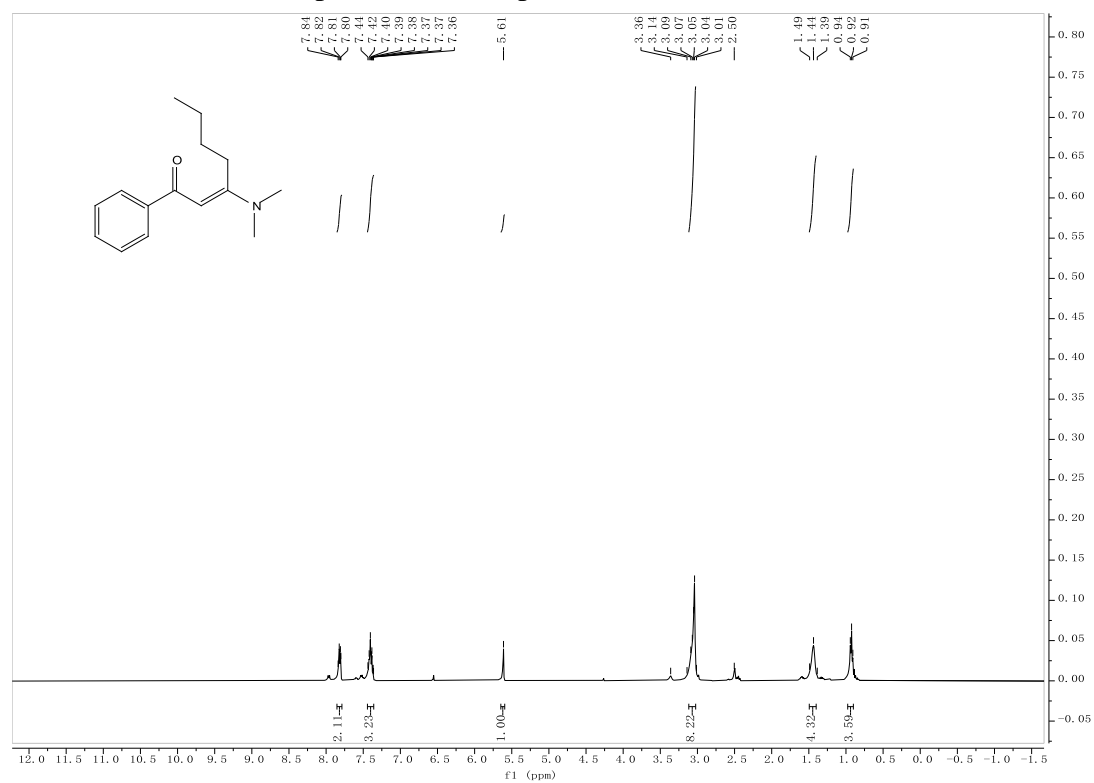

<sup>13</sup>C NMR spectrum of compound **3ac** (101 MHz, DMSO-*d*<sub>6</sub>)

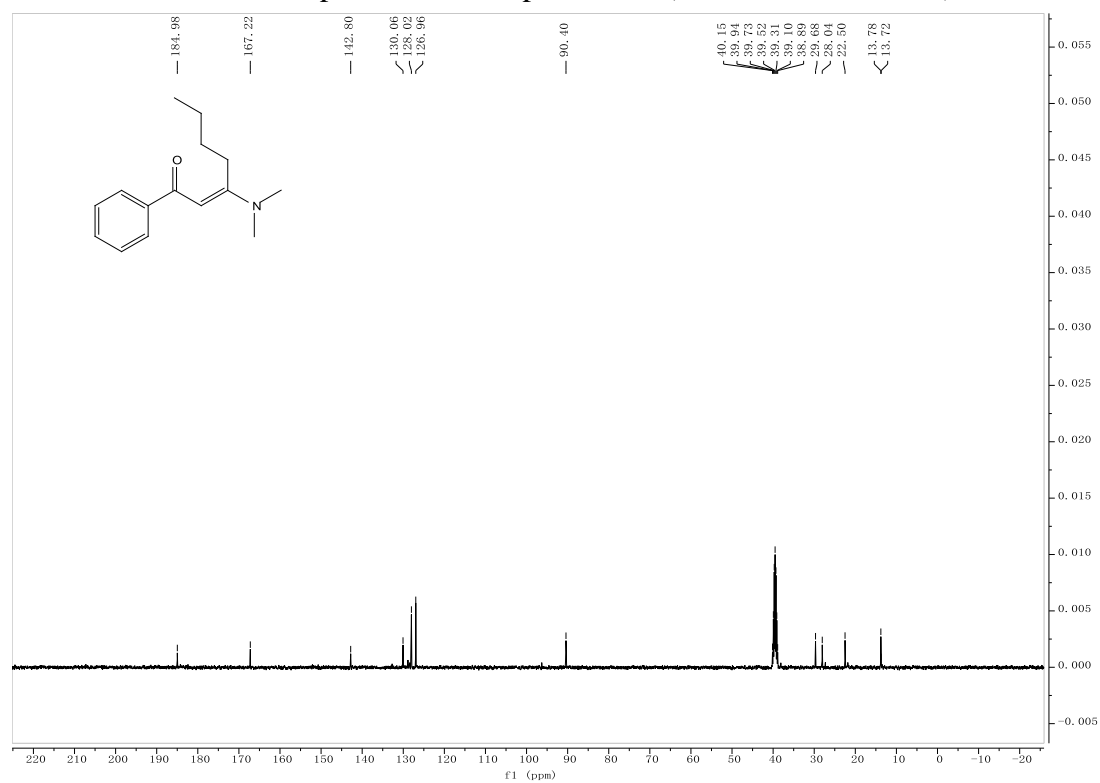

$^1\text{H}$  NMR spectrum of compound **3ad** (400 MHz,  $\text{DMSO-}d_6$ )

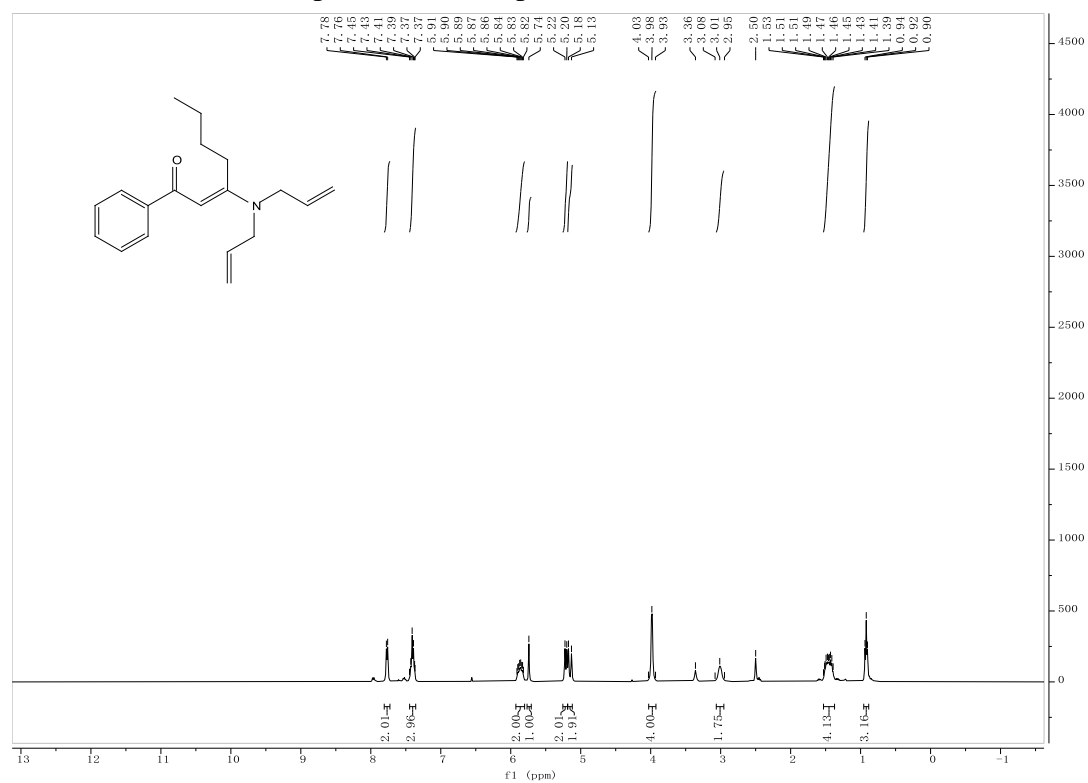

$^{13}\text{C}$  NMR spectrum of compound **3ad** (101 MHz,  $\text{DMSO-}d_6$ )

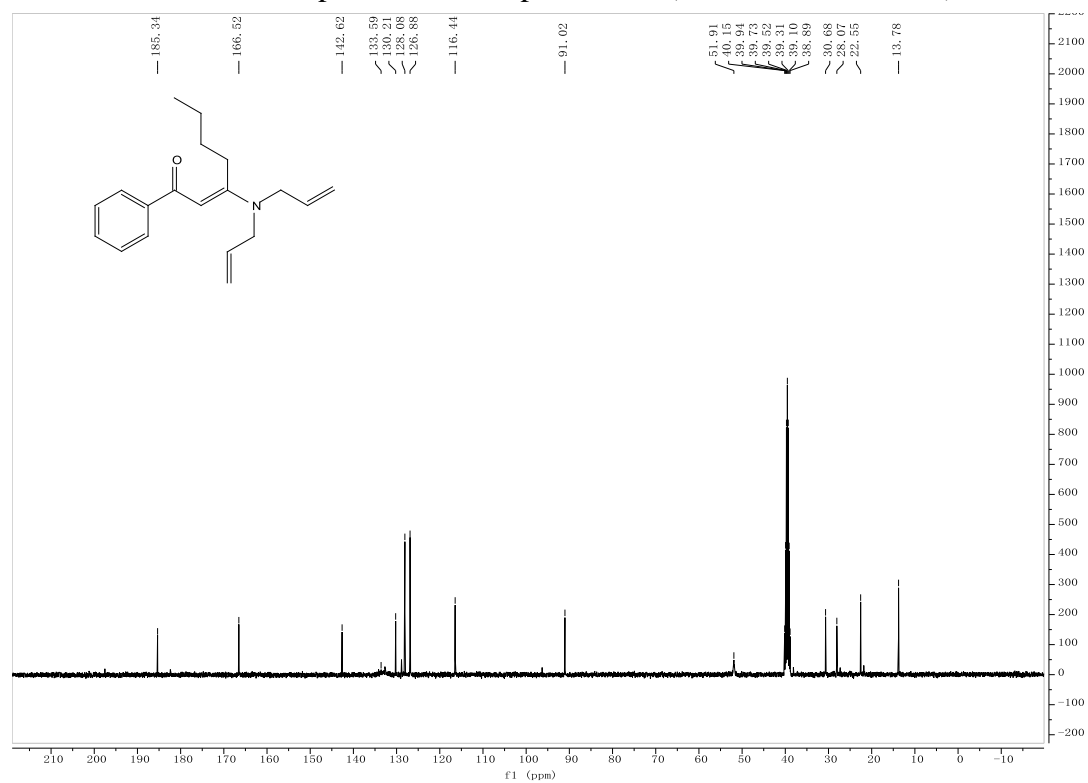

<sup>1</sup>H NMR spectrum of compound **3ae** (400 MHz, CDCl<sub>3</sub>)

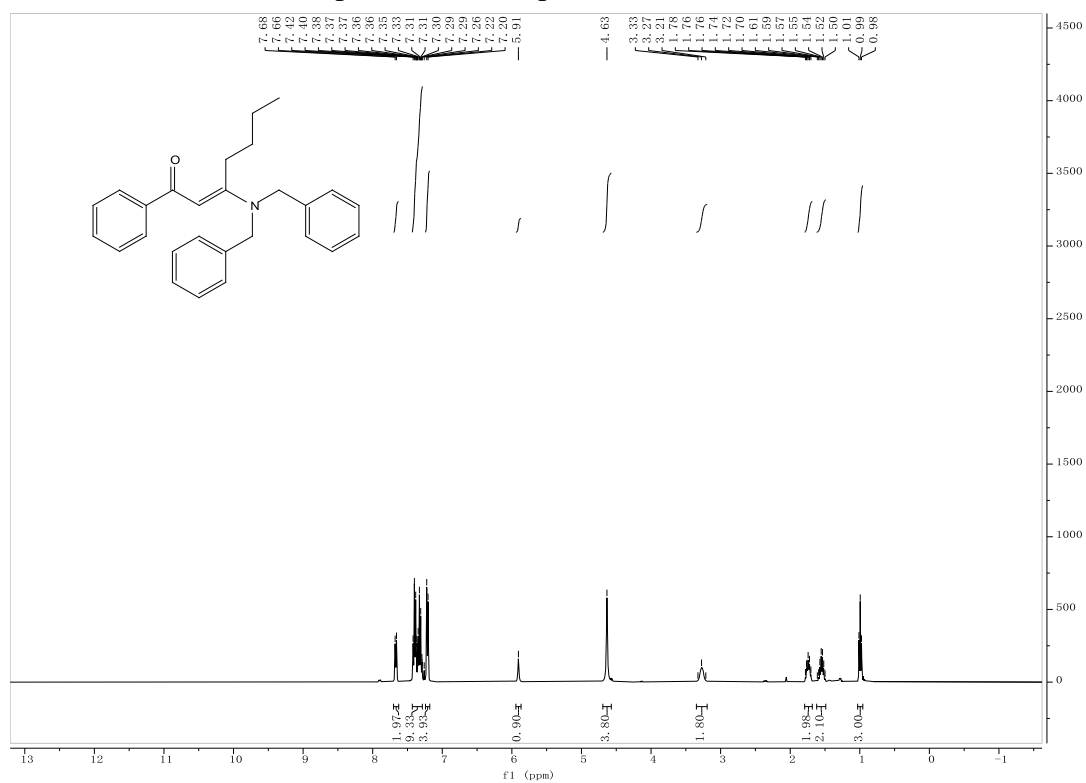

<sup>13</sup>C NMR spectrum of compound **3ae** (101 MHz, CDCl<sub>3</sub>)

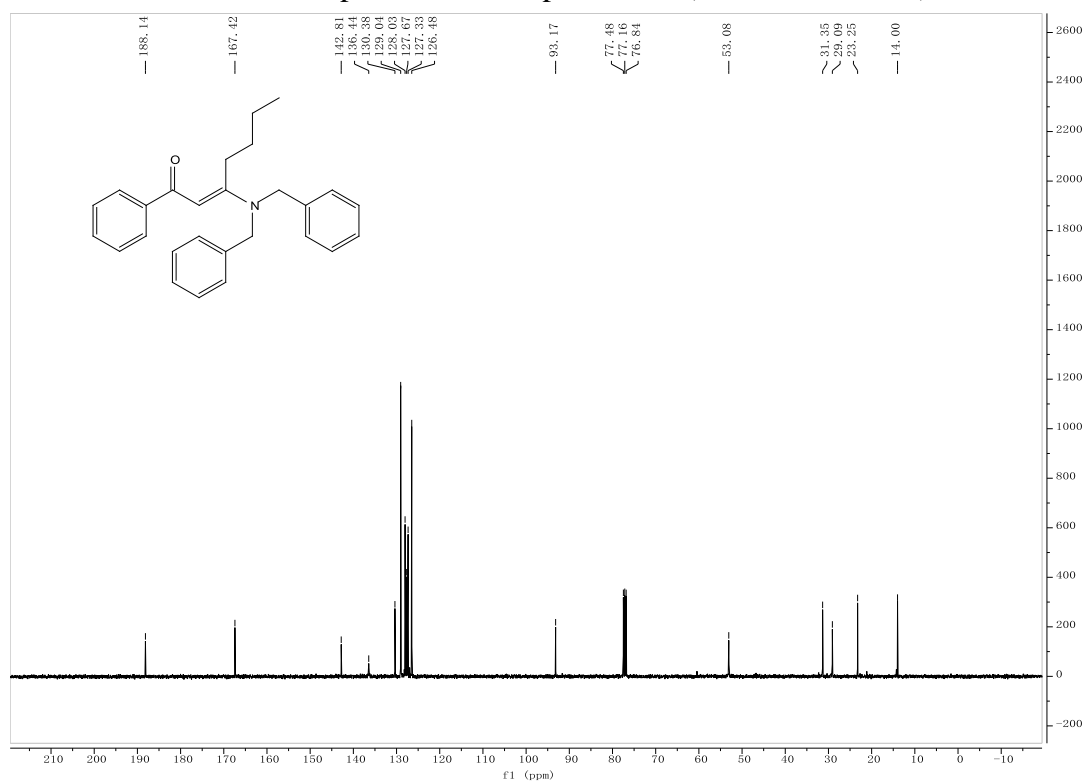

<sup>1</sup>H NMR spectrum of compound **3af** (400 MHz, DMSO-*d*<sub>6</sub>)

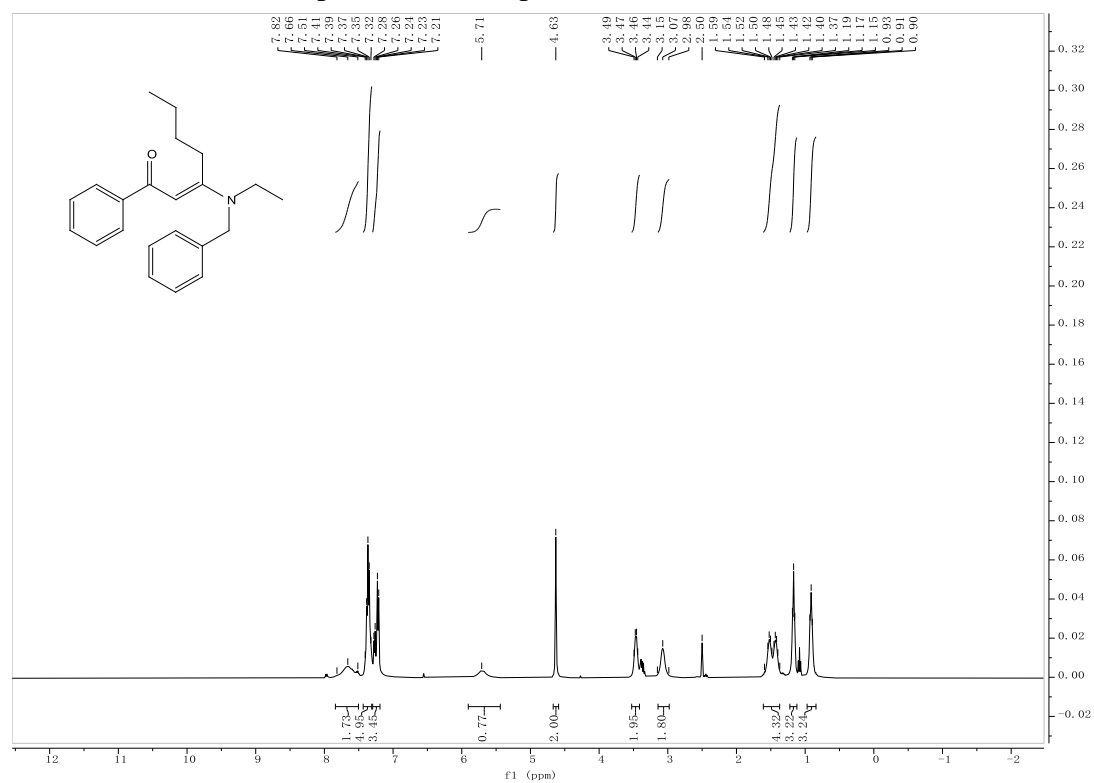

<sup>13</sup>C NMR spectrum of compound **3af** (101 MHz, DMSO-*d*<sub>6</sub>)

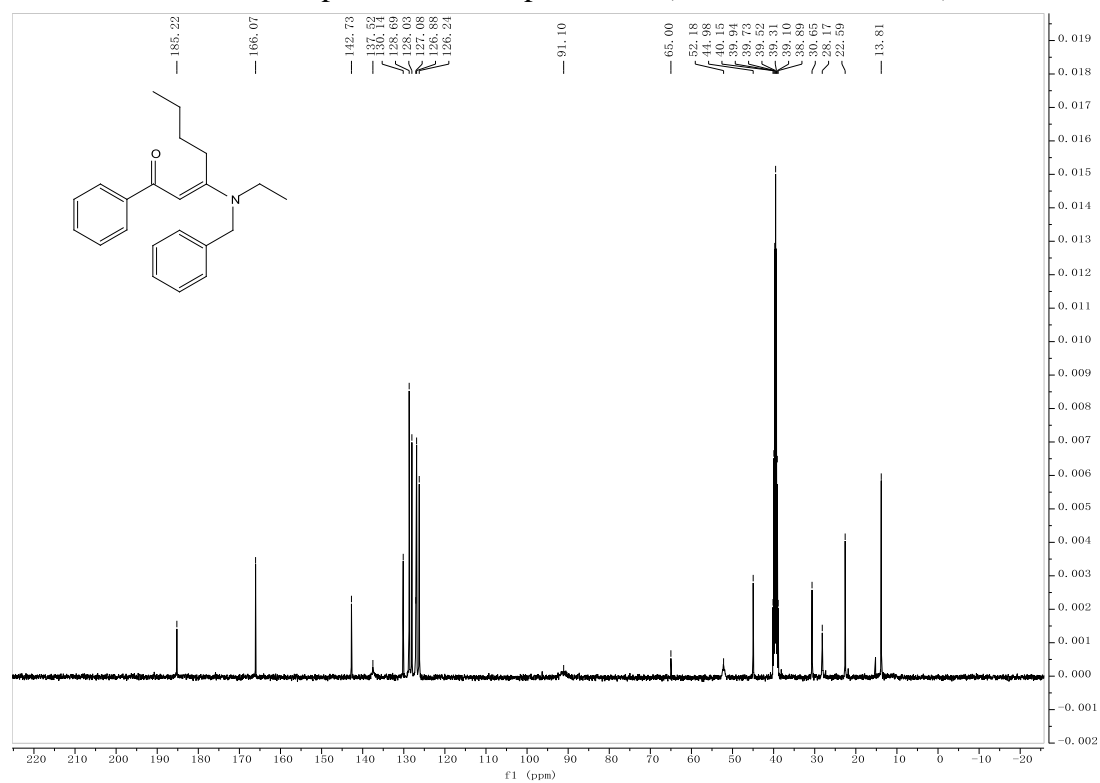

$^1\text{H}$  NMR spectrum of compound **4a** (400 MHz,  $\text{CDCl}_3$ )

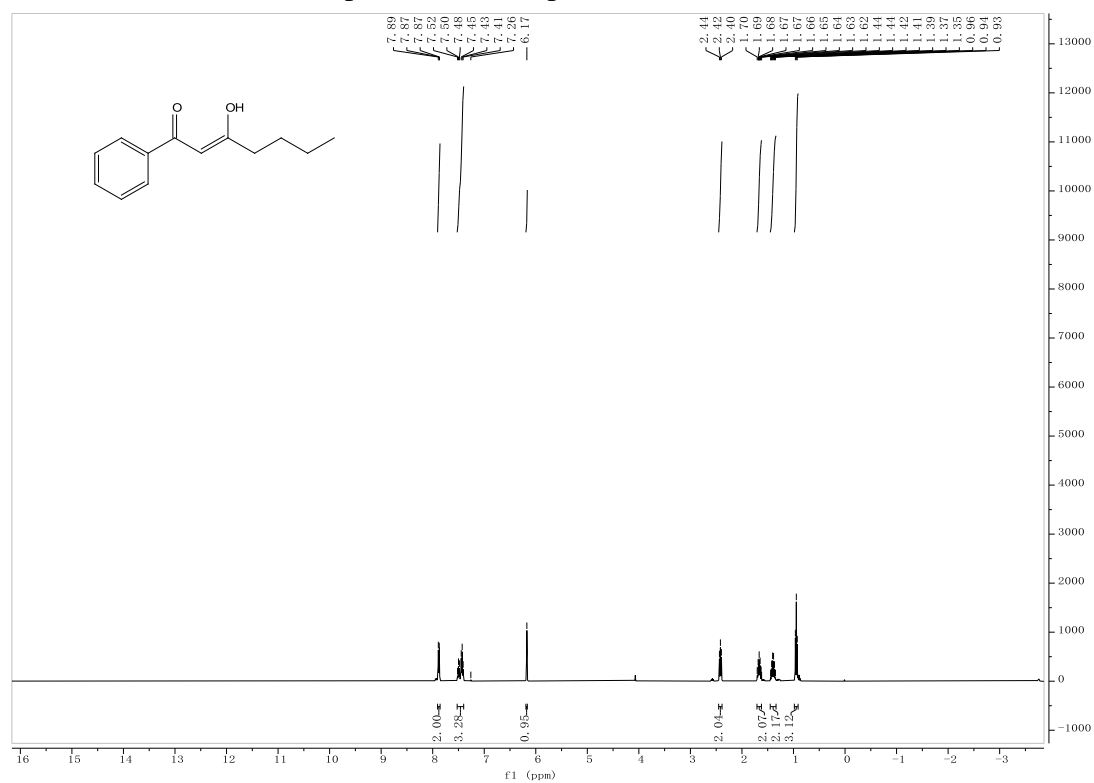

$^{13}\text{C}$  NMR spectrum of compound **4a** (101 MHz,  $\text{CDCl}_3$ )

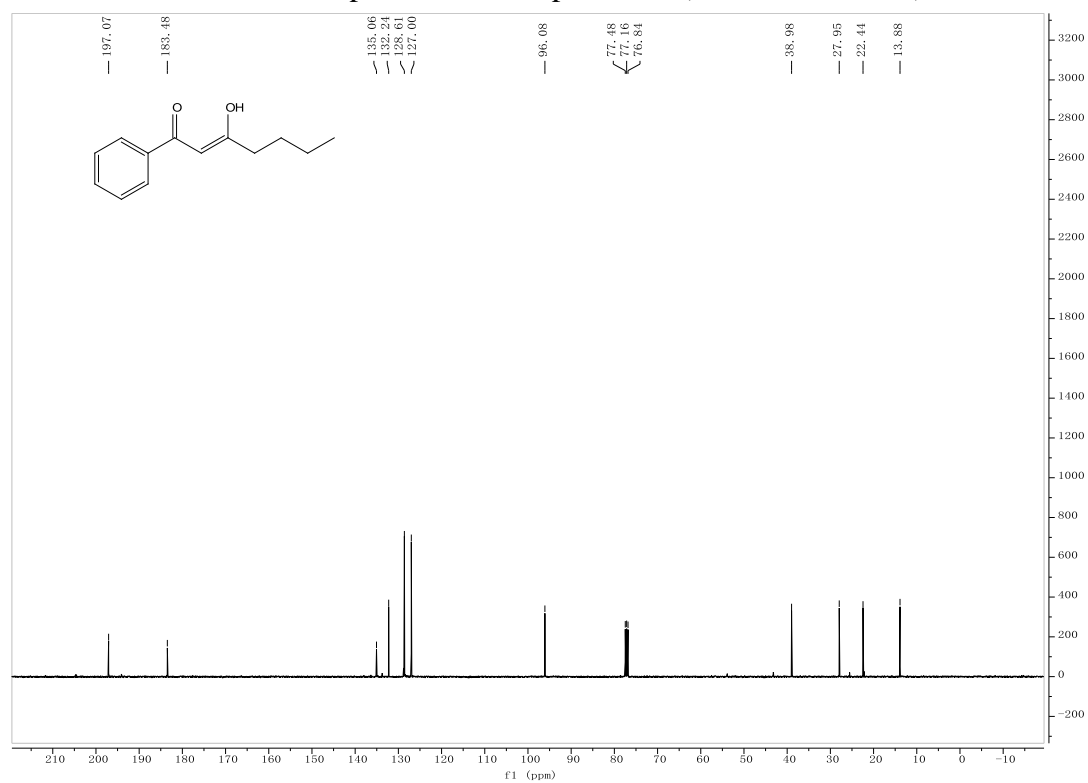

<sup>1</sup>H NMR spectrum of compound **4b** (400 MHz, CDCl<sub>3</sub>)

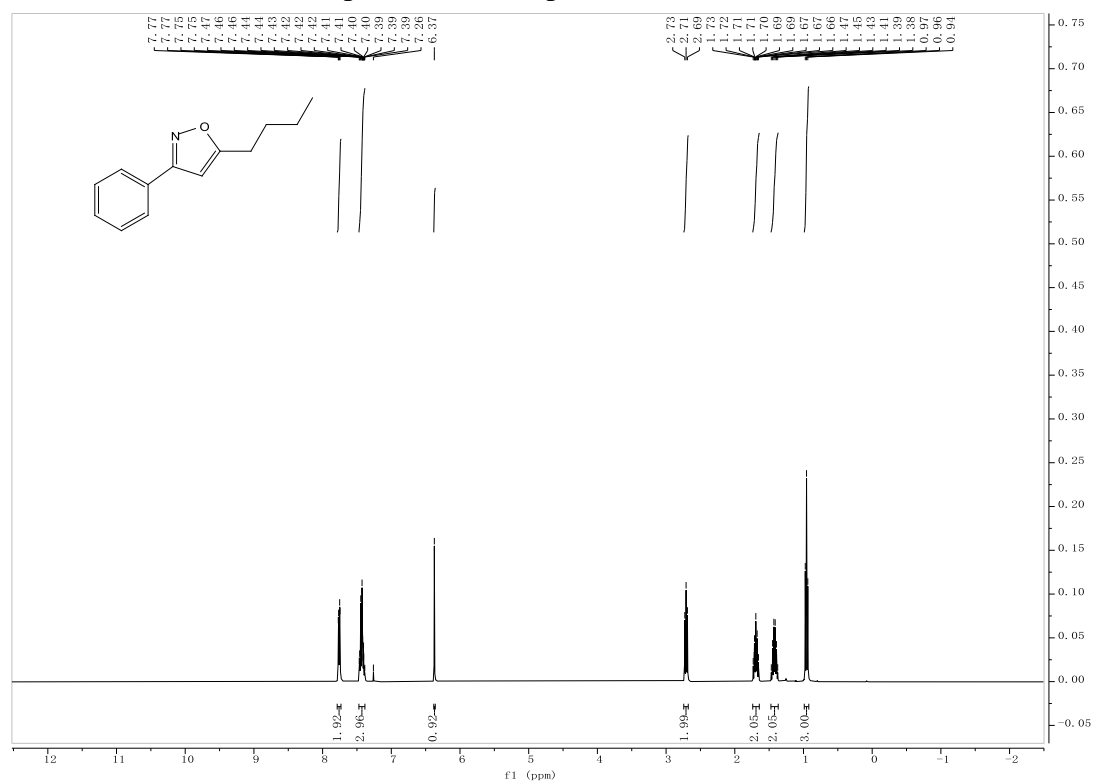

<sup>13</sup>C NMR spectrum of compound **4b** (101 MHz, CDCl<sub>3</sub>)

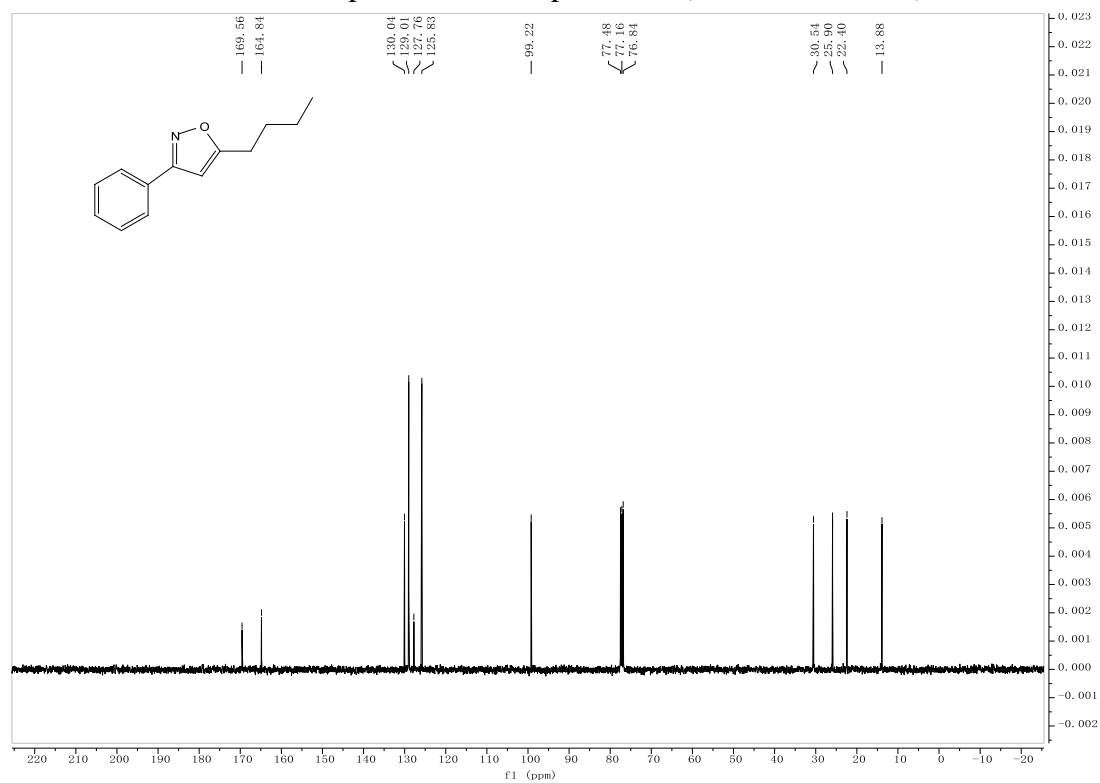

<sup>1</sup>H NMR spectrum of compound **4c** (400 MHz, CDCl<sub>3</sub>)

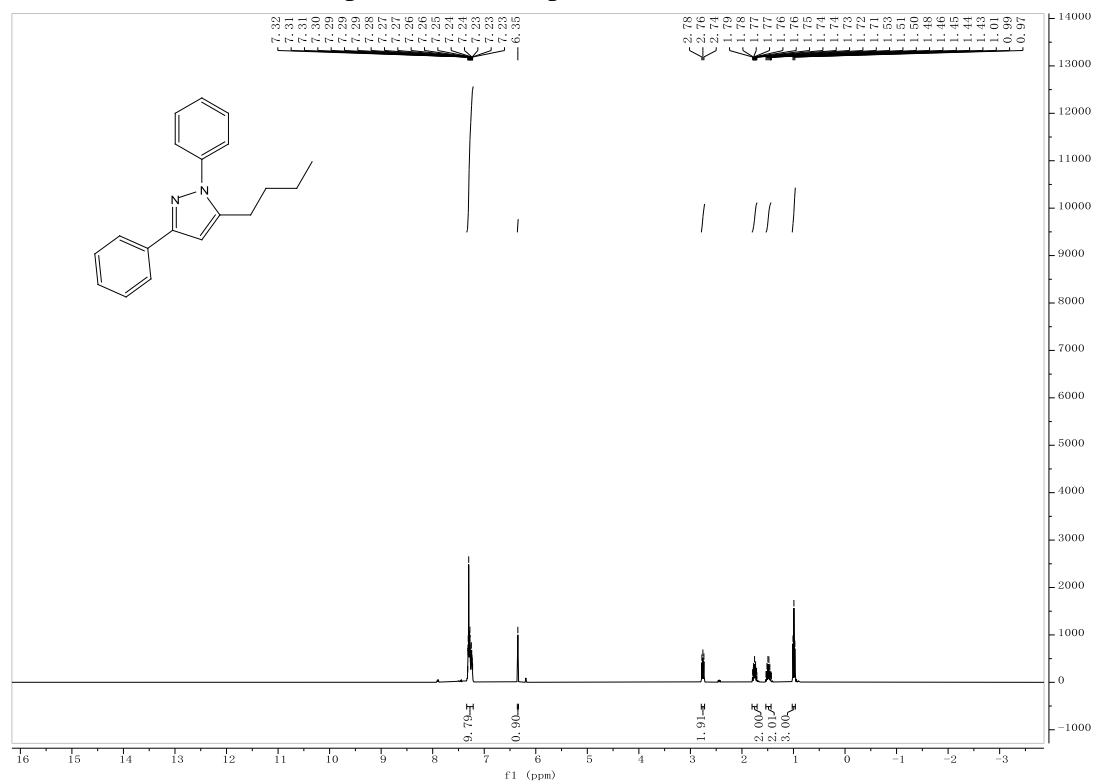

<sup>13</sup>C NMR spectrum of compound **4c** (101 MHz, CDCl<sub>3</sub>)

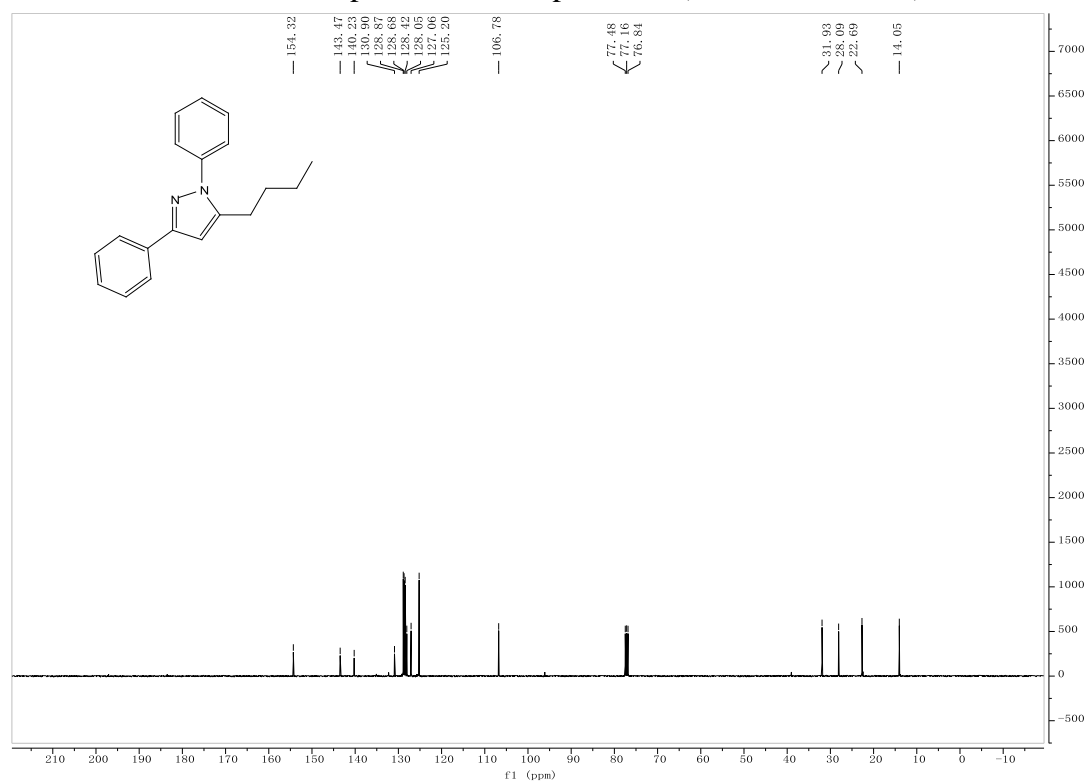

<sup>1</sup>H NMR spectrum of compound **5** (400 MHz, CDCl<sub>3</sub>)

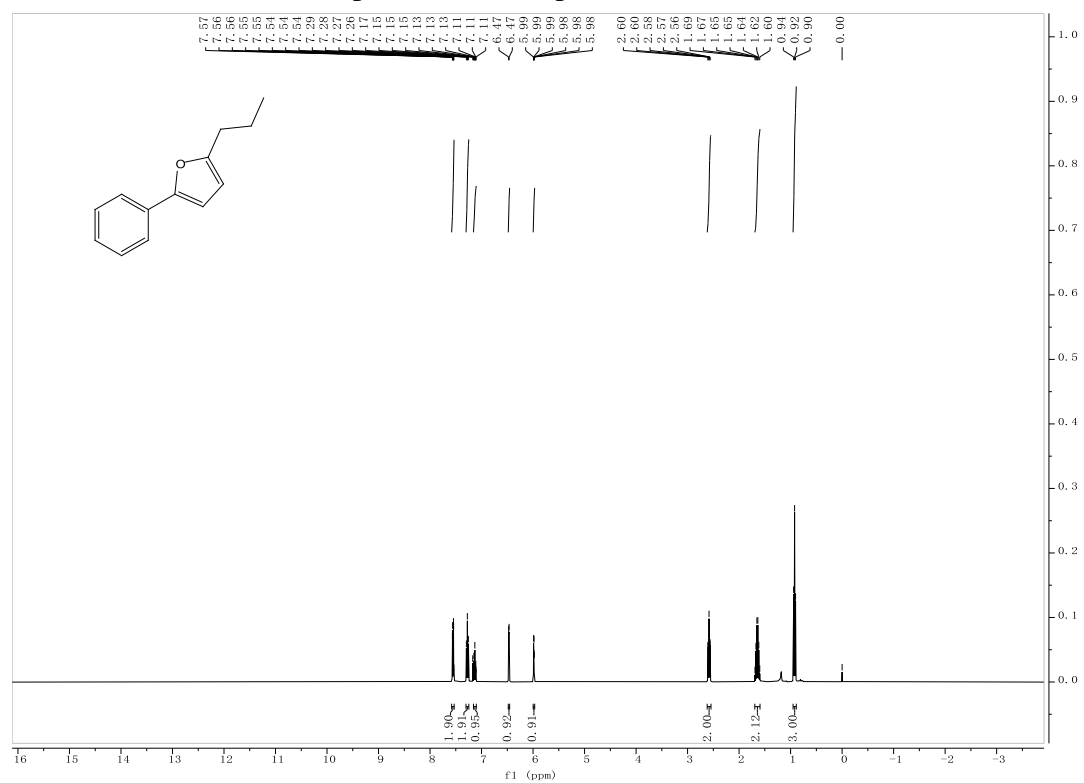

<sup>13</sup>C NMR spectrum of compound **5** (101 MHz, CDCl<sub>3</sub>)

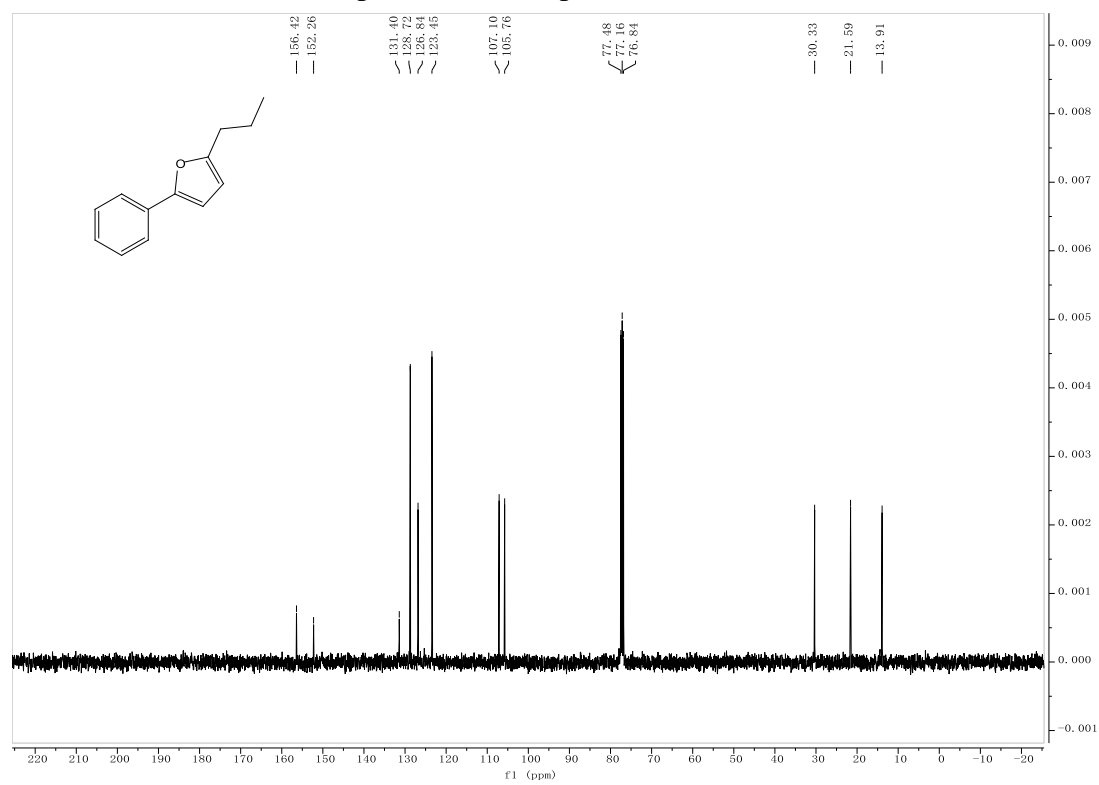

Supplement: d6ob00759g1.pdf [file d6ob00759g1.pdf]
